# Supplementary material
Source: publisher figshare collection journal article supplement (https://diabetesjournals.figshare.com/articles/dataset/_/16629145)
Supplement: Supplementary file 2 [file 2]

# Risks of and from SARS-COV-2 infection and COVID-19 in people with diabetes: a rapid evidence review

## Authors

Jamie Hartmann-Boyce (corresponding author), Nuffield Department of Primary Care Health Sciences, University of Oxford, UK. Jamie.hartmann-boyce@phc.ox.ac.uk; 01865 289 206. Radcliffe Primary Care Building, Radcliffe Observatory Quarter, Woodstock Road, Oxford, UK, OX2 6GG.

Karen Rees, Freelance Warwickshire, UK

Igho Onakpoya, Department of Continuing Education, University of Oxford, UK

Afolarin Otunla, Medical Sciences Division, University of Oxford, UK

Elizabeth Morris, Nuffield Department of Primary Care Health Sciences, University of Oxford, UK

Jessica Morgan, Medical Sciences Division, University of Oxford, UK

Patrick Highton, Diabetes Research Centre, University of Leicester, UK

Jana Suklan, NIHR Newcastle In Vitro Diagnostics Co-operative , Newcastle University, UK

Ffion Curtis, Diabetes Research Centre, University of Leicester, UK

Clare Goyder, Nuffield Department of Primary Care Health Sciences, University of Oxford, UK

Lauren O'Mahoney, Diabetes Research Centre, University of Leicester, UK

Olivia James, Medical Sciences Division, University of Oxford, UK

Samuel Seidu, Diabetes Research Centre, University of Leicester, UK

Kamlesh Khunti, Diabetes Research Centre, University of Leicester, UK

## Acknowledgements

WHO commissioned and financially supported this work. KK is supported by the National Institute for Health Research (NIHR) Applied Research Collaboration East Midlands (ARC EM) and the NIHR Leicester Biomedical Research Centre (BRC). JS receives funding from the NIHR [Newcastle In Vitro Diagnostics Co-operative (MIC-2016-014)]. PH, FC and LO are supported by NIHR ARC EM. EM and CG are supported by Wellcome Trust Clinical Doctoral Research Fellowships. The views expressed are those of the authors and not necessarily those of the NIHR or the Department of Health and Social Care.

## Background

In the context of the COVID-19 pandemic, the World Health Organisation (WHO) and WHO Member States requested information and guidance on key topics related to COVID-19 and the virus which causes the disease, SARS-COV-2. This rapid review was commissioned to address specific key questions for WHO to provide high-quality, evidence-informed information products around COVID-19.

This review presents a summary of the latest research evidence on the effects of COVID-19 in people with diabetes (PWD).

At the outset of the pandemic, PWD were assumed to be at increased risk from COVID-19. During 2020, emerging data signalled increased risk of adverse outcomes, including mortality, in PWD, likely dependent on a range of different factors.(1, 2) It is important to establish the risks COVID-19 poses to PWD in order to enable informed decision-making by PWD, their carers, healthcare providers, and policymakers.

Therefore, in this rapid review, we set out to review the evidence regarding the extent to which PWD are at increased risk of SARS-CoV-2 infection, and/or of suffering its complications including associated mortality. In particular, we set out to analyse evidence on the following questions:

1. Is diabetes associated with increased risk of acquiring SARS-CoV-2?
2. Is diabetes associated with hospitalization with COVID-19?
3. Is diabetes associated with the severity (including ICU admission, death, and other composite measures of severity) of COVID-19 outcomes?
4. Are there differences in outcomes of SARS-CoV-2 infection within the population of people with diabetes?

## Methods

A protocol was agreed in advance with the WHO and published online.(3) This was updated in 2022 at the request of WHO.(4) Methods follow a general framework for a suite of rapid reviews commissioned by WHO in respect to their scientific briefs on COVID-19 and selected non-communicable diseases. As pre-specified by WHO, systematic reviews were first identified; primary studies were then to be reviewed only if insufficient systematic reviews were found.

### Searches, screening and inclusion criteria

We searched the Cochrane COVID-19 study register, Embase, MEDLINE, and LitCOVID on 3 December 2020 for published literature or literature accepted for publication but not yet published, in any language (see Appendix 1 and (4) for search strategies). Results from this search have previously been published.(5) We ran an update search of COVID-END, Epistemonikos, Europe PMC, PubMed, and TRIPdatabase on 19 October 2022.

Two reviewers screened titles and abstracts, with discrepancies resolved by discussion or referral to a third reviewer. One reviewer screened full texts for the 2020 searches; for the 2022 searches, this was done in duplicate. We selected systematic reviews (defined as any review in which at least one database was systematically searched) according to the following inclusion criteria:

- Population: people diagnosed with any type of diabetes, with no limitations by age, disease severity, or duration. Excluding people with 'pre-diabetes' (e.g., impaired glycaemic control which does not meet clinical threshold for diabetes diagnosis) and gestational diabetes.
- Exposure: SARS-CoV-2 infection.
- Comparator: Questions 1 to 3 (as above), people without diabetes. Question 4 (as above): people with diabetes, according to the following comparisons as specified in advance by WHO:
  - Type 1 vs type 2 diabetes
  - Controlled vs uncontrolled glycaemia (by HbA1c, whichever definition of control has been used)
  - Previously diagnosed diabetes vs diabetes first diagnosed at COVID-19 diagnosis
  - People treated with metformin vs people not treated with metformin

- People treated with dipeptidyl peptidase 4-inhibitors (DPP4-i) vs people not treated with DPP4-i
- People treated with insulin vs people not treated with insulin
- People with CVD/hypertension/ chronic kidney disease vs people without
- Low socioeconomic status vs high socioeconomic status
- Outcome: Rates of confirmed SARS-CoV-2 infection; admission to hospital and/or to ICU with COVID-19; death with COVID-19.

### Data extraction, appraisal, and synthesis

One reviewer appraised and extracted data from systematic reviews in relation to the above review questions; data were checked by a second. We included any systematic reviews which met the above criteria. Quality was assessed using the AMSTAR-2 checklist, but focussing only on critical domains, namely: protocol registered before commencement; adequacy of literature search; justification for excluding individual studies; risk of bias from individual studies; appropriateness of meta-analytical methods; consideration of risk of bias when interpreting results; assessment of presence and likely impact of publication bias.(6) Domains were assessed according to AMSTAR-2 guidance.(6) We considered reviews judged as yes or partial yes for 6 or 7 out of the 7 critical domains of AMSTAR-2 to be higher quality, and those reviews judged as 'no' for at least two critical domains to be of lower quality. Appraisal was not used as a basis for excluding reviews but was used when considering certainty in the findings from the reviews. Data from contributing systematic reviews were narratively synthesised. 95% confidence intervals (CIs) and  $I^2$  values are presented alongside point estimates, where available.

## Results

### Search results

After removing duplicates, our searches for systematic reviews returned 2178 references, 228 of which met our PECO criteria. The most common reasons for exclusion at full-text stage were 'wrong patient population' and 'not a systematic review' (see Figure 1). As we identified sufficient systematic reviews, we did not search further for primary literature (as per the process set out in our protocol).(3)

### Characteristics of included reviews

Of the 228 included reviews: 65 evaluated prevalence of diabetes in cohorts with COVID-19; 156 evaluated severity of COVID-19 outcomes in PWD compared to people without diabetes, including various definitions of severity, ICU admission (47 references) and/or mortality (112 references); and 71 looked at determinants of risk from COVID-19 within PWD (note some reviews contributed data on more than one review question). Within the included reviews, date of search ranged from March 2020 to March 2022. Table 1 lists full citations for the included reviews; Table 2 shows key characteristics of included reviews. Unless stated otherwise, reviews did not specify type of diabetes they included.

In addition to the reviews listed in Table 2, we found two umbrella reviews (reviews of reviews). Characteristics of these are summarised in this paragraph; their results are integrated into the outcomes below. Harrison 2021 provided an overview of reviews of cardiovascular risk factors and cardiovascular disease and their association with COVID-19 outcomes, with searches up to November 2020.(7) They identified findings from 84 reviews, and focussed on the 32 of those that they assessed as moderate (n=31) or high (n=1) quality according to AMSTAR-2. Kastora 2022 investigated the impact of diabetes on COVID-19 mortality and hospital outcomes, with searches up

to August 2021.(8) They identified 53 eligible meta-analyses, and from these extracted data from 185 individual studies, pooling where they deemed it appropriate to do so.

AMSTAR-2 judgements (conducted for critical domains only) are summarised by domain in Table 3 and are provided in more detail in Table 4. Eight reviews (Tan 2020; Sathish 2020; Espinosa 2020; Mesas 2020; Izcovich 2020; Kobjane 2020; Ng 2022; Trskova-Schwarzbach 2021) scored yes or partial yes across all seven domains. A further 30 scored yes or partial yes across six domains, and 47 scored yes or partial yes on 5 of the 7 domains. Where systematic reviews provided conflicting answers for the same review question, we prioritised results from the higher scoring reviews. Within the included reviews, included studies were mainly retrospective observational studies. None of the reviews identified relevant randomized controlled trials.

### Is diabetes associated with an increased risk of acquiring SARS-CoV-2 and/or of hospitalisation with COVID-19?

Sixty-five reviews reported some data on prevalence (Table 5). Six of these were judged to be higher quality (yes or partial yes on at least 6 of 7 AMSTAR-2 critical domains). The most recent search data within this set of reviews was January 2022. The vast majority of the data on prevalence comes from hospitalised or at the least symptomatic cohorts. Therefore, questions on acquiring SARS-CoV-2 and hospitalisation with COVID-19 are discussed together here. Few reviews looked at differences between prevalence of diabetes according to setting, but, as described below, one review indicated higher prevalence of diabetes in hospitalised than non-hospitalised (but symptomatic) cohorts. However, certainty in this finding was limited.(9)

Estimates of percentages of PWD within cohorts of people with COVID-19 were highly heterogeneous but on the whole PWD were over-represented in COVID-19 cases compared to population averages (note, population averages may also be under-representations of true diabetes prevalence due to selective diabetes screening within communities) (Table 5). Estimates from individual studies included in the retrieved systematic reviews ranged from 1.7% to 40% PWD within COVID-19 confirmed cases. The pooled estimates in the systematic reviews of PWD within COVID-19 confirmed cases ranged from 7.7% to 23%. In a cohort of people with obesity and COVID-19 this increased to 30.3%.(10) Estimates of diabetes prevalence from the six higher-quality reviews ranged from 10.8% to 22% when looking at all cases, and from 17% to 20% in subgroups with severe disease.(11-16)

Multiple reviews flagged up the presence of heterogeneity between studies. As acknowledged by the reviewers, some of this heterogeneity will be driven by different practices in recording diabetes status (e.g., on admission with COVID-19 or from previous healthcare records), but other reasons have also been investigated. Kumar 2020 (1) (judged to be higher quality) conducted the most thorough investigation of between-study heterogeneity. Their meta-regression showed that proportion of diabetes in patients with COVID-19 was influenced by age (with studies with higher patient age having higher proportion of diabetes,  $p<0.001$ ), type of composite endpoint (with studies reporting mortality endpoint having higher proportion of diabetes,  $p=0.004$ ), and country of study (with studies outside of China having higher proportion of diabetes,  $p=0.006$ )(13). All other reviews which investigated these potential causes of heterogeneity found the same patterns. Desai 2020 and Mantovani 2020 also found diabetes prevalence was higher in older compared to younger patients (as would be expected given trends in diabetes prevalence in the general population)(17, 18). Hussain 2020 also found prevalence was higher in studies conducted outside of China and Mantovani 2020 found prevalence was greater in non-Asian than in Asian countries.(18, 19) Barrera 2020, Chen 2022, Chua 2021, Du 2020, Hartmann-Boyce 2020, Mair 2020, Meng 2020, and Wang

2020 (3) also found the prevalence of diabetes was higher in patients with severe COVID-19 manifestations, indicating a relationship between diabetes and increased COVID-19 severity which is explored further below (2, 9, 14, 20-24).

Only one review directly compared prevalence of diabetes in hospitalised versus non-hospitalised cohorts with COVID-19. Mair 2020 found higher rates of diabetes in hospitalised (8%, 95% CI 5 to 10%, 13 studies, n not stated) versus community (4%, 95% CI 1 to 7%, 3 studies, n not stated) cohorts with COVID-19, suggesting that once clinically ill PWD are more likely to be admitted to hospital. (9) However, this finding should be interpreted with caution: the review was judged to have several critical weaknesses according to AMSTAR-2; confidence intervals are compatible with no difference and between-study heterogeneity does not appear to have been investigated.

**Conclusion:** Because of a lack of data from widespread systematic, population-based asymptomatic community testing, data are insufficient to conclude whether or not diabetes predisposes to infection with COVID-19. Data on prevalence of diabetes in symptomatic/hospitalised COVID-19 cases are heterogeneous, but on the whole suggest PWD are over-represented, particularly in hospitalised cohorts and in cohorts with severe disease. Heterogeneity may in part be driven by: age of sample, with older cohorts having a higher prevalence of diabetes and multimorbidity; geographic location, with some indication of lower estimates of prevalence of diabetes in hospitalized COVID patients in Asia compared to outside of Asia; and severity of COVID-19, with estimates higher in severe COVID-19 cohorts. There is some data from an indirect comparison that, once clinically ill with COVID-19, PWD are more likely to be hospitalised; this is consistent with the observation that PWD appear over-represented in hospitalised cohorts.

### Is diabetes associated with the severity of COVID-19 outcomes?

Two umbrella reviews and 144 individual reviews evaluated data related to this question. Of the systematic reviews, 21 were considered to be of higher quality. The latest search date was March 2022. Where investigated, all of the reviews identified increased risk of mortality and severity of COVID-19 in PWD.

Where data were pooled across studies, outcomes were most commonly calculated as risk ratios (RRs) or odds ratios (ORs), calculated as:  $(\# \text{ of PWD with outcome} / \text{total } \# \text{ of people with outcome}) / (\# \text{ of PWD without outcome} / \text{total } \# \text{ of people without outcome})$ . However, at times RRs or OR's were extracted from individual studies and nature of calculation was not explicitly stated. In addition to possible variation in the way they were calculated, pooled outcomes were subject to some limitations, including statistical heterogeneity and possible publication bias in some instances. Where high statistical heterogeneity or suspected publication bias were detected, this is noted in Table 6, and, where relevant, discussed below. Most analyses were based on unadjusted estimates, as authors stated pooling data from adjusted analyses proved difficult (e.g., Barrera 2020). However, results of individual studies which provided adjusted estimates are consistent with those from meta-analyses containing unadjusted data.

### ICU admission

Twenty-three reviews evaluated ICU admission (Table 6). Of these, five were considered to be of higher quality (6 or 7 of 7 AMSTAR-2 critical domains as yes or partial yes). Of those sixteen that reported pooled effect estimates, ten found point estimates indicating increased association of ICU admission with COVID-19 in PWD, with confidence intervals excluding no difference. A further five found point estimates signalling increased association of ICU admission in PWD, but with wide confidence intervals that spanned no difference and are also compatible with a lower rate. One meta-analysis of two studies (n=179) found lower rates of ICU admission in PWD, but here again the

confidence intervals were very wide, the difference in risk being compatible with a 94% reduction to a greater than 900% increase.(25)

The four higher quality reviews which evaluated this outcome all found increases in ICU admission in PWD. In three, CIs excluded no difference and were compatible with a 10%-500% increase. Analyses varied in the amount of heterogeneity detected, from high statistical heterogeneity (1 analysis) to none (1 analysis). Fang 2020 compared rates of diabetes in people in ICU versus those not in ICU and found an RR of 1.88 (95% CI 1.10 to 3.23,  $I^2=51\%$ , 5 studies,  $n=3747$ ).<sup>(26)</sup> Zhou 2020 (2) pooled data from 4 studies ( $n=6652$ ) and found an OR of 2.98, 95% CI 1.49 to 5.98,  $I^2=48\%$ .<sup>(16)</sup> Li 2021 (2) pooled data from 3 studies ( $n$  not stated) and found an OR of 2.24 (95% CI 0.84 to 5.95,  $I^2=91\%$ ), and Gaba 2022 found a similar OR (2.79, 95% CI 1.79 to 4.34) when pooling data from 5 studies ( $n=611$ ), with no evidence of statistical heterogeneity ( $I^2=0\%$ ).<sup>(27, 28)</sup>

Kastora 2022 (overview of reviews) pooled data from 59 studies and found diabetes increased risk of ICU admission with COVID-19 (OR 1.59, 95% CI 1.15 to 2.18,  $I^2=96\%$ ,  $n=280,825$ ). Heterogeneity was not explained by region or study design.<sup>1</sup>

### Mortality

Eighty-nine reviews evaluated mortality (death with COVID-19). Of those 64 which reported a pooled estimate, all found a point estimate suggesting increased risk of death with COVID-19 in PWD; 60 of these 64 pooled estimates had confidence intervals ranging from a 1.02 to 6.71 increase. Kastora 2022 (umbrella review) found an increased risk of mortality from COVID-19 in PWD (OR 1.75, 95% CI 1.61 to 2.17,  $I^2=91\%$ , 136 studies,  $n=58,855$ ).<sup>(8)</sup> Significant statistical heterogeneity remained within their pre-specified subgroups by geographical region and study type. Harrison 2021 (overview of reviews) did not conduct their own statistical syntheses but concluded that diabetes increased risk of mortality based on consistent findings across the 18 reviews they rated as moderate quality which investigated this outcome and population.<sup>(7)</sup>

Thirteen of the reviews which calculated pooled effect estimates were considered higher quality according to the AMSTAR-2 critical domains; 12 of the 13 detected a statistically significant increase in risk (in the ninth, Singh 2020<sup>(2)</sup>, the pooled estimate from only 2 studies resulted in wide CIs (RR 1.88, 95% CI 0.89 to 3.73).<sup>(13, 16, 26, 29-34)</sup> In these studies, point estimates for pooled RRs ranged from 1.48 to 1.83, and for ORs ranged from 1.25 to 2.52. Where  $I^2$  values were reported these were in the range of those not considered to indicate significant heterogeneity ( $<40\%$ ) with the exception of Ssentongo 2020 ( $I^2=84\%$ ) and Gaba 2020 ( $I^2=62\%$ ).<sup>(27, 33)</sup> Authors of the largest meta-analysis in this group, Izcovich 2020, used GRADE to evaluate certainty in this evidence and estimated absolute risks. In their meta-analysis of 52 studies ( $n=30,303$ ), diabetes increased odds of mortality by an OR of 1.84 (95% CI 1.61 to 2.1,  $I^2=33\%$ ).<sup>(29)</sup> This translated to an absolute estimated increased risk of 5.6% increase in mortality (95% CI 4.3 to 7%). They judged the evidence to be of high certainty. Though some of the contributing studies were judged to be at high risk of bias, sensitivity analysis showed that the pooled estimate was not sensitive to the removal of studies at high risk of bias and/or those which did not report adjusted estimates.

### Other measures of severity

55 reviews evaluated 'severity' as a construct in and of itself; of these 10 were considered higher quality. Severity was a broad definition – in some reviews, it was not defined, or authors relied on categorisations from original study authors. In other reviews, severity was a composite score derived

---

<sup>1</sup> The authors state that heterogeneity was to some extent explained by these factors, but substantial heterogeneity remained within these groups



from set criteria, most commonly including elements such as ICU admission, mortality, oxygen levels, acute respiratory distress syndrome (ARDS), and the need for mechanical ventilation. More detail can be found in Table 6.

Of the 42 reviews which calculated a pooled estimate for severity, all found point estimates suggesting increased risk of severe disease in PWD. In 41 of 42, this effect was statistically significant (the one estimate which did not detect a statistically significant difference contained 4 studies (total n not reported) and found an OR of 2.07, 95% CI 0.89 to 4.82).(35) ORs ranged from 1.43 to 3.68; RRs ranged from 1.50 to 2.96.  $I^2$  values tended to indicate moderate statistical heterogeneity, but with some variation. The 10 higher quality reviews all found statistically significant increases equating to, on average, over a doubling in risk of severe disease.(13, 26, 29, 30, 32, 34, 36-39) Again, Izcovich 2020 was the largest analysis deemed to be high quality and also used GRADE to evaluate certainty and calculate absolute risks. In their meta-analysis of 97 studies (n=21,381), in which severity was defined as reported by study authors or on the basis of ARDs or the requirement of ICU or invasive mechanical ventilation, they found a pooled OR of 2.51 (95% CI 2.2 to 2.87,  $I^2=32\%$ ) and judged the evidence to be of high certainty. Estimated absolute risks were a 13.2% increase in severe COVID-19 disease (95% CI 11 to 15.5%).(29)

Kastora 2022 (umbrella review) pooled outcomes from 43 reviews evaluating 'critical' or 'severe' COVID-19 disease in PWD compared to those without; results indicated increased risk in PWD (OR 2.88, 95% CI 2.29 to 3.63,  $I^2=73\%$ , n=7,984). Again, heterogeneity was not explained by region or study design.(8)

**Conclusion:** There is consistent evidence across many systematic reviews that diabetes increases risks of severe COVID-19 disease including ICU admissions and of death with COVID-19. Most data are from retrospective studies. The largest review judged the evidence to be of high certainty regarding increased risk of severe COVID-19 and increased risk of death with COVID-19 in PWD; restricting analyses to studies at low risk of bias also showed increased risk for both outcomes in PWD. Estimates for severe disease suggest a greater than doubling increase in risk; for death, estimates suggest a slightly less than 2-fold increase in risk. There is some evidence of between-study heterogeneity, suggesting magnitude of increase may vary by study population/characteristics. Data on ICU admission again suggested increased risk in PWD.

## Are there differences in outcomes of SARS-CoV-2 infection within the population of people with diabetes?

Systematic reviews which contained analyses or data regarding our pre-specified characteristics are discussed below. Only one review contained any data on socioeconomic status; Boddu 2020 reported on data from a UK cohort study which found that within PWD (as well as in the general population without diabetes) COVID-19 outcomes were worse in people from less-advantaged groups.(40)

### Type of diabetes

The majority of studies in this field, and hence of reviews aggregating those studies, do not delineate between diabetes type. To some extent, this may be due to issues with recording diabetes status in hospital. Regardless, it is an area that warrants better reporting. One overview of reviews and five reviews contained some data explicitly comparing risks in type 1 versus type 2 diabetes. Kastora 2022 (overview of reviews) pooled mortality data from two small studies (total n=308) and found no clear difference when comparing type 1 and type 2 (compared to type 2, OR for COVID-19 mortality with type 1 0.68, 95% CI 0.24 to 1.87,  $I^2=0\%$ ). (8)

Of the other four reviews, three conducted meta-analyses. Shafiee 2022, judged to be a higher quality review, pooled data from 11 studies (n=7,690,415) in people with COVID-19.(41) When comparing people with type 1 to people with type 2 diabetes, they found no significant differences between groups in terms of ICU admission (log OR -0.22, 95% CI -0.81 to 0.37) or hospitalization (log OR -0.48, 95% CI -1.38 to 0.27). Unadjusted analyses suggested reduced risk of all-cause mortality in people with type 1 compared to type 2 diabetes (log OR -0.71, 95% CI -1.38 to -0.03) but the authors descriptively report that after adjusting for age and comorbidities, risk with type 1 compared to type 2 was higher in five studies, lower in three studies, and not significantly different in two studies.

Alhumaid 2021, judged to be of lower quality, looked specifically at a subset of patients with both diabetic ketoacidosis (DKA) and COVID-19.(42) They used binary logistic regression analyses to explore the effect of demographic and biochemical parameters on death. Within their subset of people with COVID-19 hospitalised with DKA, people with type 2 diabetes were more likely to die (univariate OR 5.24, 2.07 to 15.19, multivariate OR 4.67, 2.23 to 4.31, reference group unclear) compared to those with type 1 (univariate OR 0.83, 0.23 to 2.92, multivariate OR 0.61, 95% CI 1.8 to 2.3, reference group unclear, n=243). Caution should be taken in interpreting these results as reporting is limited, the review was judged to have multiple critical weaknesses, and the latter CI are not consistent with the pooled result (they exclude the point estimate).

Schlesinger 2021, also judged to be of lower quality, found no clear evidence in a difference in risk of death from COVID-19 when comparing type 2 to type 1 diabetes (standard rate ratio (SRR) 1.65, 95% CI 0.64 to 4.26, 2 studies,  $I^2=0\%$ , certainty of evidence judged to be very low).(43)

The other two reviews only presented narrative information. Both Apicella 2020 and Boddu 2020 cited data from a large UK cohort study (n=61,414,47).(40, 44, 45) Adjusted for age, sex, deprivation, ethnicity, and geographical region, compared with people without diabetes, the risk of in-hospital COVID-19-related death was markedly higher in people with type 1 diabetes than with type 2 (type 1 OR 3.51 (95% CI 3.16–3.90); type 2 OR 2.03 (1.97–2.09)).(45)

No reviews explicitly considered differential risks in other types of diabetes (this was not something we set out to investigate).

### Newly diagnosed diabetes

Three reviews contained some data on diabetes diagnosed at time of COVID-19 infection. Sathish 2020, judged to be of higher quality, conducted a meta-analysis of eight studies (n=3700) to estimate prevalence of newly diagnosed diabetes in hospitalised COVID-19 patients.(46) They estimated a pooled proportion of 14.4% (95% CI 5.9 to 25.8%) but data were highly heterogeneous ( $I^2=98\%$ ). Of note, this area may also be particularly prone to publication bias, as reports with higher-than expected levels of newly diagnosed diabetes may be more likely to be written and subsequently published.

As described above Alhumaid 2021, judged to have two or more critical weaknesses, looked specifically at a subset of patients with both diabetic ketoacidosis (DKA) and COVID-19.(42) Within their subset of people with COVID-19 hospitalised with DKA, people with newly diagnosed diabetes had ORs consistent with increased risk of mortality, but with CIs encompassing no difference; again, caution should be taken in interpreting these results due to limitations in reporting and conduct (univariate OR 1.67, 95% CI 0.31 to 2.11; multivariate OR 1.3, 95% CI 0.51 to 1.99; reference group not specified, n=243).

Boddu 2020, which was judged to have two or more critical weaknesses according to AMSTAR-2, did not conduct meta-analysis but notes that SARS-CoV-2 can trigger severe diabetic ketoacidosis at



presentation in people with new-onset diabetes.(40) The authors note that at present there is no evidence that SARS-CoV-2 induces diabetes on its own accord. Acute infection, stress and steroids can all also raise blood glucose. Distinguishing between new diabetes *caused* by COVID-19 and newly diagnosed diabetes which was already present prior to COVID-19 infection but was exacerbated and/or detected due to measurements taken at hospital also is a challenge. A global registry of patients with COVID-19-related diabetes (covidien.e-dendrite.com) has been set up to monitor this.

### Glucose control

Eleven systematic reviews contained some data on glucose control; ten were judged to have two or more critical weaknesses according to AMSTAR-2 (2, 40, 42-44, 47-52) and one was judged of higher quality (53). Kastora 2022 (overview of reviews) compared mortality between those with an HbA1c above >70mmol/mol, and those with HbA1c ≤70 mmol/mol; risk was higher in those with higher HbA1c (HR 2.75, 95% CI 2.60 to 2.91,  $I^2=0\%$ , 5 studies, n not reported).

Five of the other systematic reviews pooled data in meta-analyses; all found point estimates suggesting increased risks with higher blood glucose, but many of these estimates were imprecise. Praticchiazzo 2022, the one review of this group to be judged of higher quality, pooled data from studies in people with diabetes and found that HbA1c was linearly associated with increased COVID-19 mortality or worsening when considered as a continuous variable (OR 1.01, 95% CI 1.01 to 1.01,  $p<0.0001$ ,  $I^2=39\%$ , four studies, n not reported). (53) When restricting analyses only to mortality, results were similar but no longer statistically significant (OR 1.01, 95% CI 0.95 to 1.08,  $p=0.73$ ,  $I^2=0\%$ , two studies, n not reported). Zhu 2021, judged to have multiple critical weaknesses, reported that the association between elevated HbA1c as a continuous variable and adverse prognosis of COVID-19 was not statistically significant (OR, 1.02; 95%CI, 0.95–1.09, four studies, n participants NR,  $I^2=0\%$ ), but that when reduced to a dichotomous variable higher HbA1c contributed to an increase risk of mortality from COVID-19 (OR, 2.300; 95% CI 1.679 to 3.150, six studies, n=1180,  $I^2=48\%$ ; cut off point for higher HbA1c varied across trials).(52) Schlesinger 2021 (judged to have multiple critical weaknesses, n not reported) found very low certainty evidence of no difference in COVID-19 mortality in people with diabetes based on HbA1c when pooling data from 2 studies (53-75 versus <53 mmol/mol SRR 1.08, 95% CI 0.57 to 2.06,  $I^2=34\%$ ; >75 versus <53 mmol/mol SRR 0.95, 95% CI 0.50 to 1.79,  $I^2=0\%$ ).(43) Lack of evidence of a difference persisted when pooling four studies providing data on risk per 20 mmol/mol HbA1c difference (SRR 1.05, 95% CI 0.80 to 1.35,  $I^2=0\%$ , low certainty evidence). By contrast, they judged there to be moderate certainty of an increased risk based on blood glucose at administration when comparing ≥11 versus <6 mmol/l (SRR 8.60, 95% CI 2.24 to 32.83, 2 studies,  $I^2=0\%$ ) and when evaluating risk based on 1mmol/l difference in blood glucose at admission (SRR 1.10, 95% CI 1.05 to 1.16, 2 studies  $I^2=0\%$ , low certainty evidence). The difference was not statistically significant when comparing 6-11 versus <6 mmol/l at admission (SRR 2.76, 95% CI 0.56 to 13.51, 2 studies  $I^2=0\%$ , low certainty evidence).

Chen 2020 set out to assess the impact of COVID-19 on blood glucose, and pooled data from three trials (n=222) in PWD comparing blood glucose or glycated haemoglobin (HbA1c) levels between patients classed as having severe versus mild disease (definition not provided)(47). The pooled mean difference (MD) in blood glucose was 2.21 mmol/L (95% CI 1.30 to 3.13,  $I^2=0\%$ ), indicating a statistically significantly greater elevation in blood glucose in patients with severe disease. HbA1c was also higher in patients with severe disease, but the estimate was also compatible with no difference (MD 0.29%, 95% CI -0.59 to 1.16,  $I^2=68\%$ ) when pooling the two small studies providing data (n=179). Lee 2020 set out to determine the effects of hyperglycaemia on complications of COVID-19. They pooled results from 8 studies (including 681 PWD) and found that hyperglycaemia was associated with worse COVID-19 prognosis (in both PWD and people without diabetes).(49)

Pooled results showed an increased association of admission to ICU (OR 2.7, 95% CI 0.98 to 7.35,  $I^2$  NR) and of death with COVID-19 (OR 7.2, 95% CI 2.7 to 19.2,  $I^2$  NR) in PWD with hyperglycaemia compared to those with 'controlled blood glucose' (not defined).

The remaining six reviews did not conduct meta-analyses relevant to this question, but all described an association between higher blood glucose and worse COVID-19 outcomes, citing individual studies to support these assertions.(2, 40, 44, 48, 50, 51) As infection and steroids can in themselves raise blood glucose levels, determining the direction of association between high blood glucose when hospitalised with COVID-19 and worse COVID-19 outcomes is challenging. A number of reviews also cited data from large (mainly UK-based) cohort studies which used last-measured HbA1c, taken prior to COVID-19 infection, which provides a better picture of longer-term blood glucose control. These studies also found significant associations between higher HbA1c (defined as  $>10\%$  (86 mmol/mol)) and worse COVID-19 outcomes, including ICU admission and ARDS.(1, 45) However, Alhumaid 2021 found that in a subset of patients with both diabetic ketoacidosis (DKA) and COVID-19, there was no evidence of statistically significant differences in mortality outcomes based on HbA1c (reference group not provided).(42)

### Selected medications

We focussed on metformin, DPP4-i, and insulin.

#### Insulin

Kastora 2022 (overview of reviews) pooled data on mortality in studies comparing insulin use to non-insulin use in people with diabetes and COVID-19; risk was higher in those using insulin (HR 2.80, 95% CI 2.29 to 3.44,  $I^2=43\%$ , 7 studies, n not reported). This was consistent with results from a further six systematic reviews evaluating associations between insulin use and COVID-19 outcomes. Of the three judged to be of higher quality:

- Kan 2021 restricted studies to populations with type 2 diabetes; pooled results from seven of these (n not reported) showed greater COVID-19 mortality in insulin users than in insulin non-users (pooled OR, 2.20; 95% CI, 1.34–3.60). Statistical heterogeneity was high ( $I^2=80.6\%$ ), with five of the studies showing increased risk with confidence intervals excluding no difference, one showing no difference, and one with a point estimate indicating lower risk in those using insulin but with confidence intervals encompassing no difference as well as clinically significantly increased risk.(54)
- Nguyen 2022 also restricted studies to populations with type 2 diabetes.(55) Pooled data from 33 studies (n not reported) showed that insulin users were more likely to die during COVID-19 hospitalization than non-users (OR 1.70, 95% CI 1.33 to 2.19). Statistical heterogeneity was very high statistical ( $I^2=97\%$ ) but for the most part appeared to be driven by magnitude rather than direction of association; all but 5 of the 33 studies had point estimates indicating increased risk in insulin users, and in the 5 where point estimates indicated reduced risk, 95% CI incorporated the possibility of increased risk.
- Chen 2022 (2) conducted a Bayesian network meta-analysis and did not explicitly restrict to populations with type 2 diabetes.(56) Fourteen studies had data on insulin use (n not reported). Insulin treatment was associated with a greater risk of death from COVID-19 (OR 1.38, 95% CI 1.24 to 1.54,  $I^2=66\%$ ).

The three reviews judged to have significant limitations also had findings consistent with the above. Wang 2022 found that insulin use was significantly associated with a higher risk of death people with diabetes and COVID-19 compared to those who did not use insulin (OR 2.59, 95% CI: 1.66–4.05;  $P < 0.0001$ ;  $I^2=57\%$ ) (57), as did Schlesinger 2021 (RR 1.75, 95% CI 1.01 to 3.03, n = 5 studies, authors judged evidence to be high certainty).(43) Yang 2021 (2) also found a non-statistically significant

association with increased in-hospital admission for COVID-19 in people with diabetes using insulin compared to people with diabetes not using insulin (OR 1.23, 95% CI 0.65 to 2.33).(58)

#### *DPP4i*

Kastora 2022 (overview of reviews) pooled data on mortality in five studies comparing DPP4i use to non-use (which could include other diabetes medications, or no diabetes medications); pooled data were highly heterogenous with two studies showing statistically significant increased risk in those using DPP4-I, and three showing statistically significant reduced risk in those using DPP4i. This variation was also present in the other 14 reviews evaluating associations between DPP4i use and COVID-19 outcomes. Of the five judged to be of higher quality, results were conflicting, with one finding DPP4i use was associated with statistically significantly increased risk, another finding they were associated with statistically significantly reduced risk, two finding point estimates consistent with reduced risk but 95% CI incorporating no difference and increased risk, and one with point estimates suggesting increased risk but 95% CI also incorporating no difference and reduced risk:

- Nguyen 2022 found an increased risk of mortality in patients with T2D on DPP-4i compared to those not using DPP4i (OR 1.26, 95% CI 1.22 to 1.31, 28 studies, n not reported).(55) Statistical heterogeneity was high ( $I^2=82\%$ ), with 9 of the 28 studies having point estimates consistent with reduced risk; of these two had 95% CI excluding no difference.
- Chen 2022 (2), not explicitly restricted to populations with type 2 diabetes, found 21 studies with data on DPP4i (n not reported).(56) DPP4i use was associated with a lower risk of death from COVID-19 than non-use (OR 0.88, 95% CI 0.78 to 1.00,  $I^2=63\%$ ); this association remained when restricting to those studies adjusting for age, gender and other characteristics.
- Kan 2021 (restricted to populations with type 2 diabetes) pooled results from eight studies (n not reported) and found no difference in COVID-19 mortality between DPP4-I users and non-users (pooled OR, 0.72; 95% CI, 0.51 to 1.01.;  $P=0.057$ ,  $I^2=46\%$ ).(54)
- Han 2022 included 31 studies in 66,914 participants with COVID-19, and found no evidence of a clear association between DPP4i and mortality from COVID-19 (OR 0.95, 95% CI 0.72 to 1.26) or poor composite outcomes (OR 1.27, 95% CI 0.91 to 1.77) in PWD.(59)
- Hariyanto 2021 included data from 10 studies (n=7012) evaluating the impact of DPP4i in people with COVID-19 and diabetes. Pooled analyses indicated no clear association with DPP4i and severe COVID-19 (OR 1.07, 95% CI 0.87 to 1.31,  $I^2=0\%$ ) or mortality (OR 1.14, 95% CI 0.87 to 1.51,  $I^2=8\%$ ).(60)

Of the remaining nine studies:

- Three found point estimates indicating reduced risk, but confidence intervals incorporating the possibility of no difference. Patoulas 2021 described a 'non-significant decrease in 3%' in those using DPP4i compared to those who didn't in the risk for COVID-19 related death (95% CI 0.67 to 1.41,  $I^2=83\%$ ).(61) Bonora 2021 found no clear evidence of a difference when pooling seven studies with unadjusted data (RR 0.81, 95% CI 0.57 to 1.15,  $I^2=55\%$ ) or when pooling data from the three studies adjusting on participant characteristics (RR 0.74, 95% CI 0.47 to 1.16,  $I^2=64\%$ ).(62) In their main model testing the association between DPP4i use and mortality, Pal found no significant association (OR 0.79, 95% CI 0.46 to 1.36), but significant heterogeneity ( $I^2=80\%$ ). In a subgroup analysis restricted to in-hospital use of DPP4i pooled data suggested benefit (OR 0.37, 95% CI 0.23 to 0.58) and no heterogeneity ( $I^2=0\%$ ).(63)
- Three found statistically significant reductions in mortality in people using DPP4i. Rakhmat 2021 found that DPP4i were associated with lower mortality in patients with COVID-19 (RR 0.76, 95% CI 0.60 to 0.97,  $I^2=44.5\%$ ). Their meta-regression showed that the association was significantly affected by metformin (OR 1.02, 95% CI 1.00 to 1.04 and ACEI/ARB use OR 1.04,

95% CI 1.01 to 1.07).(64) Similarly, Zein 2022 reported that DPP4i use was associated with reduced mortality (OR 0.75, 95% CI 0.56 to 0.99,  $I^2=42.9\%$ ) and that this association was affected by metformin (OR 1.03, 95% CI 1.01 to 1.06,  $p = 0.010$ ) and ACEI/ARB use (OR 1.06, 95% CI 1.02 to 1.10,  $p = 0.004$ ).(65) Yang 2021 found that the use of DPP4i inhibitors was associated with decreased mortality due to COVID-19 (OR 0.58, 95% CI 0.34 to 0.99,  $I^2=51.1\%$ ).(66)

- Three studies did not provide meta-analyses for this comparison. Apicella 2020 noted that though there is speculation that DPP4-i could, hypothetically, reduce virulence (by acting as a co-receptor for a subset of coronaviruses and hence interfering with binding), there is no clinical evidence of this.(44) They cite two studies which found no associations between glucose-lowering drugs (as prescribed/taken prior to COVID-19 illness) and COVID-19 outcomes in people hospitalised with COVID-19. Flaherty 2020 sounded a note of possible optimism regarding the role of DPP4i as possible receptors for SARS-CoV-2, but calls for further research to investigate their role.(67) Carrasco-Sanchez 2022 summarises an expert consensus exercise on the effectiveness and safety of DPP4i in treating patients with diabetes and COVID-19. They stated there was no clear evidence that DPP4i impact risk of 'contagion', there was no evidence that DPP4i were unsafe in this context, and that there was some evidence that DPP4i may reduce mortality in hospitalized patients with COVID-19, but not in outpatients.(68)

### Metformin

Kastora 2022 (overview of reviews) pooled data on mortality in studies comparing metformin use to non-use in populations with diabetes; risk was lower in those using metformin (HR 0.60, 95% CI 0.54 to 0.67,  $I^2=58\%$ , 7 studies,  $n$  not reported). Though  $I^2$  indicated moderate statistical heterogeneity, all studies showed statistically significantly reduced risk in those using metformin.

A further fourteen reviews contributed information on this comparison. Of the six reviews considered higher quality, five found metformin to be associated with statistically significant reduced risks from COVID-19 (see summaries of each below), and the sixth (which contained the smallest number of studies) found a point estimate indicative of reduced risk, but confidence intervals narrowly incorporating no difference (OR 0.81, 95% CI 0.64 to 1.01,  $I^2=41.6\%$ , 8 studies)(69):

- Kan 2021 (restricted to populations with type 2 diabetes) pooled results from 15 studies ( $n$  not reported) and found reduced COVID-19 mortality in those using metformin compared to those not using metformin (pooled log OR -0.37; 95% CI -0.59 to -0.16.;  $P=0.002$ ,  $I^2=59\%$ ).(54)
- Nguyen 2022 (also restricted to populations with type 2 diabetes) also found metformin to be associated with significantly reduced mortality when comparing users with non-users (OR 0.54, 95% CI 0.47 to 0.62, 42 studies,  $n$  participants not reported).(55) Statistical heterogeneity was high ( $I^2=82\%$ ) but appeared to for the most part be driven by magnitude rather than direction of effect; of the 42 studies, only 2 had point estimates consistent with increased risk, and of these only one had confidence intervals excluding the null.
- Chen 2022 (2) conducted a Bayesian network meta-analysis; they did not explicitly restrict to populations with type 2 diabetes.(56) Twenty-five studies had data on metformin use ( $n$  not reported). Metformin was associated with a lower risk of death from COVID-19 than non-use (OR 0.74, 95% CI 0.67 to 0.81,  $I^2=61\%$ ).
- Han 2022 included 31 studies in 66,914 participants with COVID-19 and any type of diabetes, and found metformin was associated with statistically significantly lower risks of mortality (OR 0.62, 95% CI 0.50 to 0.76) or poor composite outcomes (OR 0.83, 95% CI 0.71 to 0.97).(59)

- Ganesh 2022, one of the largest reviews, found metformin was significantly associated with lower mortality in COVID-19 patients with diabetes in both unadjusted (OR 0.61 [95% confidence interval: 0.53–0.71],  $P < .00001$ ,  $I^2 = 70\%$ ) and adjusted (OR 0.78 [95% confidence interval: 0.69–0.88],  $P < .00001$ ,  $I^2 = 67\%$ ) models.(70) They considered data from 32 cohort studies in 2.9 million people, and graded the certainty of this evidence as low, downgrading results based on risk of bias and because all studies were non-randomized.

Of the remaining eight reviews (those considered lower quality), six conducted meta-analyses, all of which found a clinically and statistically significant association between metformin use prior to COVID-19 diagnosis and reduction in death with COVID-19:

- Hariyanto 2020 pooled 5 studies, and found an RR of 0.54 (95% CI 0.32 to 0.90,  $I^2=54\%$ ,  $n=6937$ ) for metformin use in PWD. The authors caution that confounding was not taken into account in most studies, and that none of the studies stated the dose or duration of metformin treatment in their samples.(71) In addition, all five studies were retrospective.
- Kow 2020 pooled 5 studies ( $n=8121$ ), all of which were in PWD, and four of which are identified by the authors as reliable given their large-scale and adjustments for multiple confounding factors. They found an OR of 0.62 (95% CI 0.43 to 0.89,  $I^2=29\%$ ). (72)
- Lukito 2020 pooled 9 studies ( $n=10,233$ ). They tested sensitivity between non-adjusted and adjusted models and found that regardless of model used, metformin was associated with a reduction in death with COVID-19 (non-adjusted model (OR 0.45, 95% CI 0.25 to 0.81;  $I^2=63.9\%$ ; adjusted model (OR 0.64, 95% CI 0.43 to 0.97;  $I^2= 52.1\%$ )). However, there was some indication of small study effects.(73)
- Poly 2021 (16 studies,  $n$  not reported) found metformin use was associated with a 35% decrease in risk of mortality among patients with COVID-19 (RR 0.65, 95% CI 0.54 to 0.80,  $I^2 =76\%$ ). (74)
- Schlesinger 2021 found users of metformin compared with non-users of metformin were at lower relative risk of dying (RR 0.50, 95% CI 0.28 to 0.90, 4 studies, authors judged certainty of evidence to be moderate).(43)
- Yang 2021 (1) (17 studies,  $n=20,719$ ) found metformin was associated with significantly decreased mortality (OR 0.64, 95% CI 0.51 to 0.79) and significantly decreased severity (OR 0.81, 95% CI 0.66 to 0.99).(75)

Of note, metformin is consistently shown to be associated with lower mortality in a range of conditions (e.g., breast cancer (76), not just COVID-19), which is thought to be driven by confounding by indication; these findings should not be immediately interpreted as suggesting that metformin has a protective effect in COVID-19 illness without further investigation. The remaining reviews did not provide pooled estimates but rather narratively summarised results from individual studies.(67, 77) Multiple review authors emphasised the need for data from randomized controlled trials to achieve clarity on whether the observed associations above are causal in nature.

### Selected co-morbidities

We focus here on PWD with concurrent cardiovascular disease, hypertension, or chronic kidney disease. Considering the high prevalence of these co-morbidities in PWD, there was a notable paucity of data in this area.

Six reviews considered co-morbidities relevant to our review. Only one was judged to be of higher quality: Corona 2021 found their observed increased risk of COVID-19 related mortality in people with diabetes was reduced in studies reporting a higher proportion of patients with CKD and/or hypertension, but that no such relationship was shown based on CVD. (78) No further information was available, as investigating this was not a central aim of the review.



Two lower-quality reviews pooled data on risks from co-morbidities *within* populations with diabetes and COVID-19. Maddaloni 2021 found that risk of mortality was significantly increased in those with concurrent CVD (OR 2.91, 95% CI 2.13 to 3.97, 4 studies,  $I^2=0\%$ ).<sup>(79)</sup> Schlesinger 2021 (judged to have 4 critical weaknesses) pooled data from 22 studies in 17,687 and found that CVD and CKD were both associated with statistically significantly increased risk of COVID-19 related death (CVD standard rate ratio (SRR) 1.56, 95% CI 1.09 to 2.24, 8 studies,  $I^2=70\%$ ; CKD SRR 1.93, 95% CI 1.28 to 2.90,  $n = 6$  studies,  $I^2=81\%$ ).<sup>(43)</sup> Evidence for both was judged to be of moderate certainty (n and reasons for judgements not provided).

Two further lower quality reviews considered co-morbidities in their analyses. Huang 2020 evaluated the impact of diabetes on a composite poor outcome in people with COVID-19 pneumonia and found a statistically and clinically significant association (see Table 6).<sup>(80)</sup> They used meta-regression to test whether the association was impacted by a range of participant characteristics. In univariate models, there was no association CVD, but they found that the association with composite poor outcome was influenced by prevalence of hypertension (weaker association in populations with greater hypertension prevalence,  $p<0.001$ ). In studies where prevalence of hypertension was  $>25\%$ , the RR was 1.93 (95% CI 1.48 to 2.52,  $I^2=58\%$ ), compared to 3.06 in studies with prevalence of hypertension  $<25\%$  (95% CI 2.19 to 4.26;  $I^2=33\%$ ). However, in multivariable meta-regression including both age and hypertension, the association was attenuated for both hypertension ( $p=0.107$ , RRs not reported) and age ( $p=0.334$ ) suggesting the observed differences are probably dependent on each other.

The other three reviews provide very little data. Barerra 2020 reports an unadjusted RR from one study of 22 people showing a high point estimate for risk of severe COVID-19 in PWD with hypertension, but due to the small sample size, CIs are very wide (RR 10, 95% CI 0.94 to 105.2).<sup>(20)</sup> Boddu 2020 cites a large UK-cohort study (45) and observes that the relationship between diabetes and COVID-19 mortality is particularly pronounced in older age groups with pre-existing renal or cardiac disease.<sup>(40)</sup> They interpret the low absolute risk of in-hospital death with COVID-19 in PWD under 40 years old as indication that co-morbidities may contribute significantly to increased risk of death with COVID-19 in PWD. Of note, in Haddon 2020, adjusting for previous hospital admissions with coronary heart disease, cerebrovascular disease, or heart failure somewhat attenuated the observed increase in risk of death with COVID-19 in PWD, but a clear increase in risk remained for both types of diabetes (type 1 OR 2.86, 95% CI 2.58 to 3.18; type 2 OR 1.80, 95% CI 1.75 to 1.86).<sup>(45)</sup>

#### Conclusions:

- Individual studies, including a very large population-based study in the UK, show that type 1 diabetes is associated with higher risks of COVID-19 mortality than type 2 diabetes, but meta-analyses investigating this found no clear evidence of a difference. These meta-analyses were all judged to have multiple critical weaknesses.
- There is no evidence of differences in risk between new-onset and pre-existing diabetes during COVID-19-. Whether COVID-19 causes new-onset diabetes continues to be unclear.
- Higher blood glucose levels, both in the immediate and longer-term, are associated with worse COVID-19 outcomes. As high blood glucose can be caused by infection and/or steroids to treat said infection, it is difficult to determine the causal relationship between worse COVID-19 outcomes and measures of blood glucose control taken when ill with COVID-19. However, general practice and national health services databases using HbA1c measured prior to COVID-19 show a clear association between glucose control and COVID-19 outcomes, with higher HbA1C prior to illness increasing risk from said illness. In the



literature HbA1c of 10% (86 mmol/mol) or 7.5% (58 mmol/mol) are commonly used as cut-offs for defining 'high'.

- Metformin use prior to hospitalisation with COVID-19 was associated with a clinically meaningful reduction in the risk of death with COVID-19, as evidenced in twelve meta-analyses and an overview of reviews. Confounding by indication can not be ruled out and no studies could establish causality.
- The association between DPP4i use and COVID-19 outcomes in people with diabetes is unclear, with conflicting results across reviews.
- Insulin use prior to COVID-19 illness was associated with a clinically meaningful increase in the risk of death with COVID-19, as evidenced in six meta-analyses and an overview of reviews. None included studies which could establish causality.
- There is very little evidence regarding the role of co-morbidities in increasing risk of worse outcomes from COVID-19 in PWD.

## Discussion

This overview of reviews provides consistent evidence from multiple meta-analyses and overviews of reviews that diabetes is a risk factor for severe disease and death from COVID-19. There was less data available on ICU admission as an outcome, but where available this data also signalled increased risk in PWD. Within PWD, higher blood glucose levels and insulin use prior to infection were associated with worse COVID-19 outcomes. Data were limited but also suggested co-morbid cardiovascular and/or renal disease increased risk from COVID-19 in PWD. Metformin was associated with improved outcomes; data on DPP4i were inconsistent.

Due to the nature of the review questions, the majority of data contributing to included reviews comes from retrospective observational studies. Reviews varied in the extent to which they assessed risk of bias. In the one high quality review which used the GRADE framework to evaluate certainty, the authors judged the evidence on the association between diabetes and increased risk of worse outcomes and death from COVID-19 to be of high certainty.<sup>(29)</sup> Though the majority of studies contributing to these analyses were judged to be at high risk of bias, results remained consistent when removing studies at high risk of bias and those which did not provide adjusted estimates.

We were unable to reach any firm conclusions on whether PWD were more likely to be infected with SARS-CoV-2. This is unsurprising and reflects limited data, especially a lack of widespread community asymptomatic testing for both SARS-CoV-2 and diabetes. Additionally, other complex issues may be at play which determine whether or not someone is tested. This includes country-level variations in testing capacity but also individual-level considerations. For example, it may be that PWD are more likely to get tested than others (if they feel or are a priori perceived as more vulnerable), but given links between deprivation and diabetes, it may also be that PWD are less likely to be tested, given reports from healthcare providers that some symptomatic patients refused to be tested or isolate at the height of the pandemic because they could not afford to miss work.

There are of course other well-established differences in risks for COVID-19 outcomes beyond those investigated here. It is worth noting that risk factors which exist in the wider population also exist in PWD – e.g., older age, deprivation, obesity, non-white ethnicity, and being male all confer greater risk both within and outside PWD. Some of these risk factors for COVID-19 severity are also risk factors for diabetes. To the extent to which reviews and individual studies have been able to adjust for these, associations have only been somewhat attenuated. In a nationwide analysis in England – arguably the largest study of its type to contribute data on COVID-19 risks in PWD – authors adjusted for age, sex, deprivation, ethnicity and geographic region and still found increased ORs for in-

hospital COVID-19 related death of approximately 2-fold for people with type 2 diabetes and greater than 3-fold for people with type 1 diabetes.(1) As both diabetes and worse COVID-19 outcomes are associated with socioeconomic disadvantage, their intersection will further exacerbate existing health disparities. This warrants urgent attention.

#### [A note regarding paediatric populations](#)

Age was not a pre-specified characteristic for this review due to clear evidence that COVID-19 risk increases with age. Risk of severe disease in children and adolescents from COVID-19 is low in the general population, and none of the systematic reviews suggested otherwise in children and adolescents with diabetes. However, even though absolute risk may be low, the one review which conducted a separate analysis in a paediatric population found that, when pooling data from four studies, children with diabetes had a higher risk of severe COVID-19 than those without diabetes (RR 2.26, 95% CI 1.95 to 2.62, n=5233, I<sup>2</sup>=0%).(81) Caution needs to be taken when interpreting this finding, as we judged this review to have significant limitations, and the result was primarily driven by a large American retrospective study finding that children with type 1 diabetes who were hospitalized for COVID-19 developed more severe disease than children without diabetes (adjusted OR 2.38, 95% CI 2.06 to 2.76).(82)

## Tables

*Table 1. Citations for included reviews*

| Study ID        | Citation                                                                                                                                                                                                                                                                                                                                                                                                                                                                                                                                             |
|-----------------|------------------------------------------------------------------------------------------------------------------------------------------------------------------------------------------------------------------------------------------------------------------------------------------------------------------------------------------------------------------------------------------------------------------------------------------------------------------------------------------------------------------------------------------------------|
| Abdi 2020       | Abdi, A.; Jalilian, M.; Sarbarzeh, P. A.; Vlaisavljevic, Z. Diabetes and COVID-19: A systematic review on the current evidences. <i>Diabetes Research &amp; Clinical Practice</i> 2020;166():108347                                                                                                                                                                                                                                                                                                                                                  |
| Abdelhafiz 2021 | Abdelhafiz AH, Emmerton D, Sinclair AJ. Diabetes in COVID-19 pandemic-prevalence, patient characteristics and adverse outcomes. <i>International Journal of Clinical Practice</i> . 2021;75(7):e14112.                                                                                                                                                                                                                                                                                                                                               |
| Aggarwal 2020   | Aggarwal, G.; Lippi, G.; Lavie, C. J.; Henry, B. M.; Sanchis-Gomar, F. Diabetes mellitus association with coronavirus disease 2019 (COVID-19) severity and mortality: A pooled analysis. <i>Journal of Diabetes</i> 2020;12(11):851-855                                                                                                                                                                                                                                                                                                              |
| Akbari 2022     | Akbari A, Fathabadi A, Razmi M, Zarifian A, Amiri M, Ghodsi A, et al. Characteristics, risk factors, and outcomes associated with readmission in COVID-19 patients: A systematic review and meta-analysis. <i>American Journal of Emergency Medicine</i> . 2022;52:166-73.                                                                                                                                                                                                                                                                           |
| Aktar 2021      | Aktar S, Talukder A, Ahamad MM, Kamal AHM, Khan JR, Protikuzzaman M, et al. Machine Learning Approaches to Identify Patient Comorbidities and Symptoms That Increased Risk of Mortality in COVID-19. <i>Diagnostics</i> . 2021;11(8):31.                                                                                                                                                                                                                                                                                                             |
| Alhumaid 2021   | Alhumaid S, Al Mutair A, Al Alawi Z, Rabaan AA, Alomari MA, Al Salman SA, et al. Diabetic ketoacidosis in patients with SARS-CoV-2: a systematic review and meta-analysis. <i>Diabetology &amp; metabolic syndrome</i> . 2021;13(1):120.                                                                                                                                                                                                                                                                                                             |
| Alireza 2021    | Alireza Abdi MJPASZV. Diabetes and COVID-19: A systematic review on the current evidences. <i>Diabetes Research and Clinical Practice</i> . 2021:108347.                                                                                                                                                                                                                                                                                                                                                                                             |
| Alvez 2021      | Alves V, Casemiro F, Araujo B, Lima M, Oliveira R, Fernandes F, et al. Factors Associated with Mortality Among Elderly People in the COVID-19 Pandemic (SARS-CoV-2): A Systematic Review and Meta-Analysis. <i>Preprints.org</i> ; 2021.                                                                                                                                                                                                                                                                                                             |
| Apicella 2020   | Apicella, Matteo; Campopiano, Maria Cristina; Mantuano, Michele; Mazoni, Laura; Coppelli, Alberto; Del Prato, Stefano. COVID-19 in people with diabetes: understanding the reasons for worse outcomes. <i>The Lancet Diabetes &amp; endocrinology</i> 2020;8:782–92                                                                                                                                                                                                                                                                                  |
| Ashktorab 2021  | Ashktorab H, Pizuorno A, Fierro NA, Villagrana EDC, Solis MEH, Cardenas G, et al. A Comprehensive Meta-Analysis of COVID-19 in Latin America. <i>Soj Microbiology &amp; Infectious Diseases</i> . 2021;8(1):1-11.                                                                                                                                                                                                                                                                                                                                    |
| Awortwe 2020    | Awortwe, C.; Cascorbi, I. Meta-analysis on outcome-worsening comorbidities of COVID-19 and related potential drug-drug interactions. <i>Pharmacological Research</i> 2020. <a href="https://doi.org/10.1016/j.phrs.2020.105250">https://doi.org/10.1016/j.phrs.2020.105250</a>                                                                                                                                                                                                                                                                       |
| Badawi 2021     | Badawi A, Vasileva D. Comparative profile for COVID-19 cases from China and North America: Clinical symptoms, comorbidities and disease biomarkers. <i>World Journal of Clinical Cases</i> . 2021;9(1):118-32.                                                                                                                                                                                                                                                                                                                                       |
| Bae 2021        | Bae S, Kim SR, Kim MN, Shim WJ, Park SM. Impact of cardiovascular disease and risk factors on fatal outcomes in patients with COVID-19 according to age: a systematic review and meta-analysis. <i>Heart</i> . 2021;107(5):373-80.                                                                                                                                                                                                                                                                                                                   |
| Bajgain 2020    | Bajgain, K. T.; Badal, S.; Bajgain, B. B.; Santana, M. J. Prevalence of comorbidities among individuals with COVID-19: A rapid review of current literature. <i>American Journal of Infection Control</i> 2020. <a href="https://doi.org/10.1016/j.ajic.2020.06.213">https://doi.org/10.1016/j.ajic.2020.06.213</a>                                                                                                                                                                                                                                  |
| Baradaran 2020  | Baradaran, A.; Ebrahimzadeh, M. H.; Baradaran, A.; Kachooei, A. R. Prevalence of Comorbidities in COVID-19 Patients: A Systematic Review and Meta-Analysis. <i>Archives of Bone &amp; Joint Surgery</i> 2020;8(Suppl 1):247-255                                                                                                                                                                                                                                                                                                                      |
| Barrera 2020    | Barrera FJ, Shekhar S, Wurth R, Moreno-Pena PJ, Ponce OJ, Hajdenberg M, Alvarez-Villalobos NA, Hall JE, Schiffrin EL, Eisenhofer G, Porter F, Brito JP, Bornstein SR, Stratakis CA, González-González JG, Rodríguez-Gutiérrez R, Hannah-Shmouni F. Prevalence of Diabetes and Hypertension and Their Associated Risks for Poor Outcomes in Covid-19 Patients. <i>J Endocr Soc</i> . 2020 Jul 21;4(9):bvaa102. doi: 10.1210/jendso/bvaa102. Erratum in: <i>J Endocr Soc</i> . 2020 Nov 07;5(1):bvaa175. PMID: 32885126; PMCID: PMC7454711.<br>Format: |
| Bennett 2020    | Bennett, S.; Tafuro, J.; Mayer, J.; Darlington, D.; Wong, C. W.; Muntean, E. A.; Wong, N.; Mallen, C.; Kwok, C. S. Clinical features and outcomes of adults with coronavirus disease 2019: A systematic review and pooled analysis of the literature. <i>International Journal of Clinical Practice</i> 2020;():e13725                                                                                                                                                                                                                               |

| Study ID              | Citation                                                                                                                                                                                                                                                                                                                                                                                                                                                                                                                                                          |
|-----------------------|-------------------------------------------------------------------------------------------------------------------------------------------------------------------------------------------------------------------------------------------------------------------------------------------------------------------------------------------------------------------------------------------------------------------------------------------------------------------------------------------------------------------------------------------------------------------|
| Bepouka 2022          | Bepouka B, Odio O, Mangala D, Mayasi N, Mandina M, Longokolo M, et al. Diabetes Mellitus is Associated With Higher COVID-19 Mortality Rates in Sub-Saharan Africa: A Systematic Review and Meta-analysis. <i>Cureus</i> . 2022;14(7):e26877.                                                                                                                                                                                                                                                                                                                      |
| Boddu 2020            | Boddu, S. K.; Aurangabadkar, G.; Kuchay, M. S. New onset diabetes, type 1 diabetes and COVID-19. <i>Diabetes and Metabolic Syndrome: Clinical Research and Reviews</i> 01 Nov 2020;14(6):2211-2217                                                                                                                                                                                                                                                                                                                                                                |
| Bonora 2021           | Bonora BM, Avogaro A, Fadini GP. Disentangling conflicting evidence on DPP-4 inhibitors and outcomes of COVID-19: narrative review and meta-analysis. <i>Journal of Endocrinological Investigation</i> . 2021;44(7):1379-86.                                                                                                                                                                                                                                                                                                                                      |
| Bradley 2022          | Bradley SA, Banach M, Alvarado N, Smokovski I, Bhaskar SMM. Prevalence and impact of diabetes in hospitalized COVID-19 patients: A systematic review and meta-analysis. <i>Journal Of Diabetes</i> . 2022;14(2):144-57.                                                                                                                                                                                                                                                                                                                                           |
| Carrasco-Sanchez 2022 | Carrasco-Sanchez FJ, Carretero-Anibarro E, Gargallo MA, Gomez-Huelgas R, Merino-Torres JF, Orozco-Beltran D, et al. [Executive Summary from Expert consensus on effectiveness and safety of iDPP-4 in the treatment of patients with diabetes and COVID-19]. <i>Endocrinologia Diabetes y Nutricion</i> . 2022;69(3):209-18.                                                                                                                                                                                                                                      |
| Chen 2020             | Chen, J.; Wu, C.; Wang, X.; Yu, J.; Sun, Z. The Impact of COVID-19 on Blood Glucose: A Systematic Review and Meta-Analysis. <i>Frontiers in Endocrinology</i> 2020;11():574541                                                                                                                                                                                                                                                                                                                                                                                    |
| Chen 2022 (1)         | Chen Y, Lv X, Lin S, Arshad M, Dai M. The Association Between Antidiabetic Agents and Clinical Outcomes of COVID-19 Patients With Diabetes: A Bayesian Network Meta-Analysis. <i>Frontiers in Endocrinology</i> . 2022;13:895458.                                                                                                                                                                                                                                                                                                                                 |
| Chen 2022 (2)         | Chen Z, Peng Y, Wu X, Pang B, Yang F, Zheng W, et al. Comorbidities and complications of COVID-19 associated with disease severity, progression, and mortality in China with centralized isolation and hospitalization: A systematic review and meta-analysis. <i>Frontiers in Public Health</i> . 2022;10:923485.                                                                                                                                                                                                                                                |
| Cheng 2021            | Cheng S, Zhao Y, Wang F, Chen Y, Kaminga AC, Xu H. Comorbidities' potential impacts on severe and non-severe patients with COVID-19: A systematic review and meta-analysis. <i>Medicine</i> . 2021;100(12):e24971.                                                                                                                                                                                                                                                                                                                                                |
| Chidambaram 2020      | Chidambaram, V.; Tun, N. L.; Haque, W. Z.; Majella, M. G.; Sivakumar, R. K.; Kumar, A.; Hsu, A. T.; Ishak, I. A.; Nur, A. A.; Ayeh, S. K.; Salia, E. L.; Zil, E. Ali A.; Saeed, M. A.; Sarena, A. P. B.; Seth, B.; Ahmadzada, M.; Haque, E. F.; Neupane, P.; Wang, K. H.; Pu, T. M.; Ali, S. M. H.; Arshad, M. A.; Wang, L.; Baksh, S.; Karakousis, P. C.; Galiatsatos, P. Factors associated with disease severity and mortality among patients with COVID-19: A systematic review and meta-analysis. <i>PLoS ONE [Electronic Resource]</i> 2020;15(11):e0241541 |
| Choi 2022             | Choi JH, Choi SH, Yun KW. Risk Factors for Severe COVID-19 in Children: A Systematic Review and Meta-Analysis. <i>Journal of Korean Medical Science</i> . 2022;37(5):e35.                                                                                                                                                                                                                                                                                                                                                                                         |
| Chowdhury 2020        | Chowdhury, S.; Goswami, S. COVID-19 and type 1 diabetes: dealing with the difficult duo. <i>International Journal of Diabetes in Developing Countries</i> 2020;40(3):315-320                                                                                                                                                                                                                                                                                                                                                                                      |
| Chua 2021             | Chua PEY, Shah SU, Gui H, Koh J, Somani J, Pang J. Epidemiological and clinical characteristics of non-severe and severe pediatric and adult COVID-19 patients across different geographical regions in the early phase of pandemic: a systematic review and meta-analysis of observational studies. <i>Journal of Investigative Medicine</i> . 2021;69(7):1287-96.                                                                                                                                                                                               |
| Corona 2021           | Corona G, Pizzocaro A, Vena W, Rastrelli G, Semeraro F, Isidori AM, et al. Diabetes is most important cause for mortality in COVID-19 hospitalized patients: Systematic review and meta-analysis. <i>Reviews in Endocrine &amp; Metabolic Disorders</i> . 2021;22(2):275-96.                                                                                                                                                                                                                                                                                      |
| Costa 2020            | Costa, F. F.; Rosario, W. R.; Ribeiro Farias, A. C.; de Souza, R. G.; Duarte Gondim, R. S.; Barroso, W. A. Metabolic syndrome and COVID-19: An update on the associated comorbidities and proposed therapies. <i>Diabetes &amp; Metabolic Syndrome</i> 2020;14(5):809-814                                                                                                                                                                                                                                                                                         |
| Damayanthi 2021       | Damayanthi H, Prabani KIP, Weerasekara I. Factors Associated for Mortality of Older People With COVID 19: A Systematic Review and Meta-analysis. <i>Gerontology &amp; Geriatric Medicine</i> . 2021;7:23337214211057392.                                                                                                                                                                                                                                                                                                                                          |
| d'Annunzio 2020       | d'Annunzio, G.; Maffei, C.; Cherubini, V.; Rabbone, I.; Scaramuzza, A.; Schiaffini, R.; Minuto, N.; Piccolo, G.; Maghnie, M. Caring for children and adolescents with type 1 diabetes mellitus: Italian Society for Pediatric Endocrinology and Diabetology (ISPED) statements during COVID-19 pandemic. <i>Diabetes Research &amp; Clinical Practice</i> 2020;168():108372                                                                                                                                                                                       |

| Study ID                | Citation                                                                                                                                                                                                                                                                                                                                                                                                                                                                 |
|-------------------------|--------------------------------------------------------------------------------------------------------------------------------------------------------------------------------------------------------------------------------------------------------------------------------------------------------------------------------------------------------------------------------------------------------------------------------------------------------------------------|
| de Almeida-Pititto 2020 | de Almeida-Pititto, B.; Dualib, P. M.; Zajdenverg, L.; Dantas, J. R.; de Souza, F. D.; Rodacki, M.; Bertoluci, M. C.; Brazilian Diabetes Society Study, Group. Severity and mortality of COVID 19 in patients with diabetes, hypertension and cardiovascular disease: a meta-analysis. <i>Diabetology &amp; metabolic syndrome</i> 2020;12:75                                                                                                                            |
| Del Sole 2020           | Del Sole, F.; Farcomeni, A.; Loffredo, L.; Carnevale, R.; Menichelli, D.; Vicario, T.; Pignatelli, P.; Pastori, D. Features of severe COVID-19: A systematic review and meta-analysis. <i>European Journal of Clinical Investigation</i> 2020;50(10):e13378                                                                                                                                                                                                              |
| Deravi 2020             | Deravi, N.; Fathi, M.; Vakili, K.; Yaghoobpoor, S.; Pirzadeh, M.; Mokhtari, M.; Fazel, T.; Ahsan, E.; Ghaffari, S. SARS-CoV-2 infection in patients with diabetes mellitus and hypertension: a systematic review. <i>Reviews in Cardiovascular Medicine</i> 2020;21(3):385-397                                                                                                                                                                                           |
| Desai 2020              | Desai, R.; Singh, S.; Parekh, T.; Sachdeva, S.; Sachdeva, R.; Kumar, G. COVID-19 and diabetes mellitus: A need for prudence in elderly patients from a pooled analysis. <i>Diabetes &amp; Metabolic Syndrome</i> 2020;14(4):683-685                                                                                                                                                                                                                                      |
| Deshmukh 2020           | Deshmukh, V.; Tripathi, S. C.; Pandey, A.; Deshmukh, V.; Vykoukal, J.; Patil, A.; Sontakke, B. COVID-19: a conundrum to decipher. <i>European Review for Medical &amp; Pharmacological Sciences</i> 2020;24(10):5830-5841                                                                                                                                                                                                                                                |
| Dessie 2021             | Dessie ZG, Zewotir T. Mortality-related risk factors of COVID-19: a systematic review and meta-analysis of 42 studies and 423,117 patients. <i>BMC Infectious Diseases</i> . 2021;21(1):855.                                                                                                                                                                                                                                                                             |
| Dhar 2021               | Dhar SK, Sachdeva K, Das M. Inflammation and hypercoagulopathy are predominant risk factors of severity in COVID-19 patients with diabetes mellitus: Summary of a meta-analysis. <i>Diabetes &amp; Metabolic Syndrome</i> . 2021;15(2):639-41.                                                                                                                                                                                                                           |
| Du 2020                 | Du, M.; Lin, Y. X.; Yan, W. X.; Tao, L. Y.; Liu, M.; Liu, J. Prevalence and impact of diabetes in patients with COVID-19 in China. <i>World Journal of Diabetes</i> 15 Oct 2020;11(10):468-480                                                                                                                                                                                                                                                                           |
| Du 2021                 | Du P, Li D, Wang A, Shen S, Ma Z, Li X. A Systematic Review and Meta-Analysis of Risk Factors Associated with Severity and Death in COVID-19 Patients. <i>The Canadian Journal of Infectious Diseases &amp; Medical Microbiology</i> . 2021;2021:6660930.                                                                                                                                                                                                                |
| Emami 2020              | Emami, A.; Javanmardi, F.; Pirbonyeh, N.; Akbari, A. Prevalence of Underlying Diseases in Hospitalized Patients with COVID-19: a Systematic Review and Meta-Analysis. <i>Archives of Academic Emergency Medicine</i> 2020;8(1):e35                                                                                                                                                                                                                                       |
| Espinosa 2020           | Espinosa, O. A.; Zanetti, A. D. S.; Antunes, E. F.; Longhi, F. G.; Matos, T. A.; Battaglini, P. F. Prevalence of comorbidities in patients and mortality cases affected by SARS-CoV2: a systematic review and meta-analysis. <i>Revista do Instituto de Medicina Tropical de Sao Paulo</i> 2020;62():e43                                                                                                                                                                 |
| Fadini 2020             | Fadini, GP; Morieri, ML; Longato, E; Avogaro, A. Prevalence and impact of diabetes among people infected with SARS-CoV-2. <i>Journal of Endocrinological Investigation</i> 2020<br><a href="https://doi.org/10.1007/s40618-020-01236-2">https://doi.org/10.1007/s40618-020-01236-2</a>                                                                                                                                                                                   |
| Faghir-Gangi 2020       | Faghir-Gangi, M.; Moameri, H.; Abdolmohamadi, N.; Nematollahi, S. The prevalence of type 2 diabetes in patients with COVID-19: a systematic review and meta-analysis. <i>Clinical Diabetology</i> November 2020;9(5):271-278                                                                                                                                                                                                                                             |
| Fang 2020               | Fang, Xiaoyu; Li, Shen; Yu, Hao; Wang, Penghao; Zhang, Yao; Chen, Zheng; Li, Yang; Cheng, Liqing; Li, Wenbin; Jia, Hong. Epidemiological, comorbidity factors with severity and prognosis of COVID-19: a systematic review and meta-analysis. <i>Aging (Albany NY)</i> 2020;12(13):12493                                                                                                                                                                                 |
| Fathi 2021              | Fathi M, Vakili K, Sayehmiri F, Mohamadkhani A, Hajiesmaeili M, Rezaei-Tavirani M, et al. The prognostic value of comorbidity for the severity of COVID-19: A systematic review and meta-analysis study. <i>PLoS ONE [Electronic Resource]</i> . 2021;16(2):e0246190.                                                                                                                                                                                                    |
| Figliozzi 2020          | Figliozzi, S.; Masci, P. G.; Ahmadi, N.; Tondi, L.; Koutli, E.; Aimo, A.; Stamatelopoulos, K.; Dimopoulos, M. A.; Caforio, A. L. P.; Georgiopoulos, G. Predictors of adverse prognosis in COVID-19: A systematic review and meta-analysis. <i>European Journal of Clinical Investigation</i> 2020;50(10):e13362                                                                                                                                                          |
| Flaherty 2020           | Flaherty, Gerard Thomas; Hession, Paul; Liew, Chee Hwui; Lim, Bryan Chang Wei; Leong, Tan Kok; Lim, Victor; Sulaiman, Lokman Hakim. COVID-19 in adult patients with pre-existing chronic cardiac, respiratory and metabolic disease: a critical literature review with clinical recommendations. <i>Tropical Diseases, Travel Medicine and Vaccines</i> (2020) 6:16. <a href="https://doi.org/10.1186/s40794-020-00118-y">https://doi.org/10.1186/s40794-020-00118-y</a> |
| Gaba 2022               | Gaba U, Altamish M, Azharuddin M, Adil M, Ghosh P, Gyawali B, et al. Risk factors and outcomes associated with diabetes mellitus in COVID-19 patients: a meta-analytic synthesis of observational studies. <i>Journal of Diabetes &amp; Metabolic Disorders</i> . 2022:1-11.                                                                                                                                                                                             |

| Study ID            | Citation                                                                                                                                                                                                                                                                                                                                                                            |
|---------------------|-------------------------------------------------------------------------------------------------------------------------------------------------------------------------------------------------------------------------------------------------------------------------------------------------------------------------------------------------------------------------------------|
| Gallo Marin 2020    | Gallo Marin, Benjamin; Aghagoli, Ghazal; Lavine, Katya; Yang, Lanbo; Siff, Emily J; Chiang, Silvia S; Salazar-Mather, Thais P; Dumenco, Luba; Savaria, Michael C; Aung, Su N. Predictors of COVID-19 severity: A literature review. <i>Reviews in Medical Virology</i> 2020:e2146. <a href="https://doi.org/10.1002/rmv.2146">https://doi.org/10.1002/rmv.2146</a>                  |
| Ganesh 2022         | Ganesh A, Randall MD. Does metformin affect outcomes in COVID-19 patients with new or pre-existing diabetes mellitus? A systematic review and meta-analysis. <i>British Journal of Clinical Pharmacology</i> . 2022;88(6):2642-56.                                                                                                                                                  |
| Giri 2021 (1)       | Giri M, Puri A, Wang T, Guo S. Clinical features, comorbidities, complications and treatment options in severe and non-severe COVID-19 patients: A systemic review and meta-analysis. <i>Nursing Open</i> . 2021;8(3):1077-88.                                                                                                                                                      |
| Giri 2021 (2)       | Giri M, Puri A, Wang T, Guo S. Comparison of clinical manifestations, pre-existing comorbidities, complications and treatment modalities in severe and non-severe COVID-19 patients: A systemic review and meta-analysis. <i>Science Progress</i> . 2021;104(1):368504211000906.                                                                                                    |
| Goel 2021           | Goel H, Gupta I, Mourya M, Gill S, Chopra A, Ranjan A, et al. A systematic review of clinical and laboratory parameters of 3,000 COVID-19 cases. <i>Obstetrics &amp; Gynecology Science</i> . 2021;64(2):174-89.                                                                                                                                                                    |
| Gold 2020           | Gold, M. S.; Sehayek, D.; Gabrielli, S.; Zhang, X.; McCusker, C.; Ben-Shoshan, M. COVID-19 and comorbidities: a systematic review and meta-analysis. <i>Postgraduate Medicine</i> 2020;132(8):749-755                                                                                                                                                                               |
| Guler 2020          | Guler, A. A.; Ozturk, M. A. COVID-19 in chronic diseases. <i>Gazi Medical Journal</i> 19 May 2020;31(2):266-270                                                                                                                                                                                                                                                                     |
| Guo 2020            | Guo, L.; Shi, Z.; Zhang, Y.; Wang, C.; Do Vale Moreira, N. C.; Zuo, H.; Hussain, A. Comorbid diabetes and the risk of disease severity or death among 8807 COVID-19 patients in China: A meta-analysis. <i>Diabetes Research &amp; Clinical Practice</i> 2020;166():108346                                                                                                          |
| Han 2022            | Han T, Ma S, Sun C, Zhang H, Qu G, Chen Y, et al. Association Between Anti-diabetic Agents and Clinical Outcomes of COVID-19 in Patients with Diabetes: A Systematic Review and Meta-Analysis. <i>Archives of Medical Research</i> . 2022;53(2):186-95.                                                                                                                             |
| Hariyanto 2020      | Hariyanto, T. I.; Kurniawan, A. Metformin use is associated with reduced mortality rate from coronavirus disease 2019 (COVID-19) infection. <i>Obesity Medicine</i> September 2020. <a href="https://doi.org/10.1016/j.obmed.2020.100290">https://doi.org/10.1016/j.obmed.2020.100290</a>                                                                                           |
| Hariyanto 2021      | Hariyanto TI, Kurniawan A. Dipeptidyl peptidase 4 (DPP4) inhibitor and outcome from coronavirus disease 2019 (COVID-19) in diabetic patients: a systematic review, meta-analysis, and meta-regression. <i>Journal of Diabetes &amp; Metabolic Disorders</i> . 2021;20(1):543-50.                                                                                                    |
| Hariyanto 2022      | Hariyanto TI, Lugito NPH, Yanto TA, Siregar JI, Kurniawan A. Insulin Therapy and Outcome of Coronavirus Disease 2019 (COVID-19): A Systematic Review, Meta-Analysis, and Meta-Regression. <i>Endocrine, Metabolic &amp; Immune Disorders Drug Targets</i> . 2022;22(5):481-9.                                                                                                       |
| Harrison 2021       | Harrison SL, Buckley BJR, Rivera-Caravaca JM, Zhang J, Lip GYH. Cardiovascular risk factors, cardiovascular disease, and COVID-19: an umbrella review of systematic reviews. <i>European Heart Journal Quality of Care &amp; Clinical Outcomes</i> . 2021;7(4):330-9.                                                                                                               |
| Hartmann-Boyce 2020 | Hartmann-Boyce, Jamie; Morris, Elizabeth; Goyder, Clare; Kinton, Jade; Perring, James; Nunan, David; Mahtani, Kamal; Buse, John B; Del Prato, Stefano; Ji, Linong. Diabetes and COVID-19: Risks, Management, and Learnings From Other National Disasters. <i>Diabetes Care</i> 2020;43:1695–1703. <a href="https://doi.org/10.2337/dc20-1192">https://doi.org/10.2337/dc20-1192</a> |
| Hoang 2021          | Hoang T, Tran Thi Anh T. Comparison of Comorbidities in Relation to Critical Conditions among Coronavirus Disease 2019 Patients: A Network Meta-Analysis. <i>Infection &amp; chemotherapy</i> . 2021;53(1):13-28.                                                                                                                                                                   |
| Honardoost 2021     | Honardoost M, Janani L, Aghili R, Emami Z, Khamseh ME. The Association between Presence of Comorbidities and COVID-19 Severity: A Systematic Review and Meta-Analysis. <i>Cerebrovascular Diseases</i> . 2021;50(2):132-40.                                                                                                                                                         |
| Hu 2020             | Hu, Y.; Sun, J.; Dai, Z.; Deng, H.; Li, X.; Huang, Q.; Wu, Y.; Sun, L.; Xu, Y. Prevalence and severity of corona virus disease 2019 (COVID-19): A systematic review and meta-analysis. <i>Journal of Clinical Virology</i> 2020;127():104371                                                                                                                                        |
| Hu 2021             | Hu J, Wang Y. The Clinical Characteristics and Risk Factors of Severe COVID-19. <i>Gerontology</i> . 2021;67(3):255-66.                                                                                                                                                                                                                                                             |
| Huang 2020          | Huang, I.; Lim, M. A.; Pranata, R. Diabetes mellitus is associated with increased mortality and severity of disease in COVID-19 pneumonia - A systematic review, meta-analysis, and meta-regression. <i>Diabetes &amp; Metabolic Syndrome</i> 2020;14(4):395-403                                                                                                                    |



| Study ID        | Citation                                                                                                                                                                                                                                                                                                                                                                                         |
|-----------------|--------------------------------------------------------------------------------------------------------------------------------------------------------------------------------------------------------------------------------------------------------------------------------------------------------------------------------------------------------------------------------------------------|
| Huang 2021      | Huang C, Soleimani J, Herasevich S, Pinevich Y, Pennington KM, Dong Y, et al. Clinical Characteristics, Treatment, and Outcomes of Critically Ill Patients With COVID-19: A Scoping Review. <i>Mayo Clinic Proceedings</i> . 2021;96(1):183-202.                                                                                                                                                 |
| Hussain 2020    | Hussain, A.; Bhowmik, B.; do Vale Moreira, N. C. COVID-19 and diabetes: Knowledge in progress. <i>Diabetes Research and Clinical Practice</i> April 2020;162. <a href="https://doi.org/10.1016/j.diabres.2020.108142">https://doi.org/10.1016/j.diabres.2020.108142</a>                                                                                                                          |
| Hussain 2020    | Hussain, S.; Baxi, H.; Chand Jamali, M.; Nisar, N.; Hussain, M. S. Burden of diabetes mellitus and its impact on COVID-19 patients: A meta-analysis of real-world evidence. <i>Diabetes and Metabolic Syndrome: Clinical Research and Reviews</i> November - December 2020;14(6):1595-1602                                                                                                       |
| Izcovich 2020   | Izcovich, A.; Ragusa, M. A.; Tortosa, F.; Lavena Marzio, M. A.; Agnoletti, C.; Bengolea, A.; Ceirano, A.; Espinosa, F.; Saavedra, E.; Sanguine, V.; Tassara, A.; Cid, C.; Catalano, H. N.; Agarwal, A.; Foroutan, F.; Rada, G. Prognostic factors for severity and mortality in patients infected with COVID-19: A systematic review. <i>PLoS ONE [Electronic Resource]</i> 2020;15(11):e0241955 |
| Javanmardi 2020 | Javanmardi, F.; Keshavarzi, A.; Akbari, A.; Emami, A.; Pirbonyeh, N. Prevalence of underlying diseases in died cases of COVID-19: A systematic review and meta-analysis. <i>PLoS ONE [Electronic Resource]</i> 2020;15(10):e0241265                                                                                                                                                              |
| Jindal 2022     | Jindal R, Gupta M, Khan FR, Chaudhry G. Prevalence of co-morbidities and its association with mortality in Indian patients with COVID-19: A meta-analysis. <i>Indian Journal of Anaesthesia</i> . 2022;66(6):399-418.                                                                                                                                                                            |
| Justino 2022    | Justino DCP, Silva DFO, Costa K, de Moraes TNB, de Andrade FB. Prevalence of comorbidities in deceased patients with COVID-19: A systematic review. <i>Medicine</i> . 2022;101(38):e30246.                                                                                                                                                                                                       |
| Kaminska 2021   | Kaminska H, Szarpak L, Kosior D, Wiecek W, Szarpak A, Al-Jeabory M, et al. Impact of diabetes mellitus on in-hospital mortality in adult patients with COVID-19: a systematic review and meta-analysis. <i>Acta Diabetologica</i> . 2021;58(8):1101-10.                                                                                                                                          |
| Kan 2021        | Kan C, Zhang Y, Han F, Xu Q, Ye T, Hou N, et al. Mortality Risk of Antidiabetic Agents for Type 2 Diabetes With COVID-19: A Systematic Review and Meta-Analysis. <i>Frontiers in Endocrinology</i> . 2021;12:708494.                                                                                                                                                                             |
| Kandil 2021     | Kandil H, Ibrahim AE, Afifi N, Arafa A. Diabetes and Risk of COVID-19 Mortality: A Systematic Review and Meta-Analysis. <i>Infectious Diseases in Clinical Practice</i> . 2021;29(3):e195-e7.                                                                                                                                                                                                    |
| Kastora 2022    | Kastora S, Patel M, Carter B, Delibegovic M, Myint PK. Impact of diabetes on COVID-19 mortality and hospital outcomes from a global perspective: An umbrella systematic review and meta-analysis. <i>Endocrinology, and Diabetes &amp; Metabolism</i> . 2022;5(3):e00338.                                                                                                                        |
| Kaur 2020       | Kaur, N.; Gupta, I.; Singh, H.; Karia, R.; Ashraf, A.; Habib, A.; Patel, U. K.; Malik, P. Epidemiological and Clinical Characteristics of 6635 COVID-19 Patients: a Pooled Analysis. <i>SN Comprehensive Clinical Medicine</i> 2020. <a href="https://doi.org/10.1007/s42399-020-00393-y">https://doi.org/10.1007/s42399-020-00393-y</a>                                                         |
| Khan 2020       | Khan, M. M. A.; Khan, M. N.; Mustagir, M. G.; Rana, J.; Islam, M. S.; Kabir, M. I. Effects of underlying morbidities on the occurrence of deaths in COVID-19 patients: A systematic review and meta-analysis. <i>Journal of Global Health</i> 2020;10(2):020503                                                                                                                                  |
| Khanal 2022     | Khanal R, Raj Bhattarai S, Basnet K, Shah S, Dhital R, Kumar Sah S, et al. Cardiac Implications of COVID-19 in Deceased and Recovered Patients: A Systematic Review. <i>Interdisciplinary Perspectives on Infectious Diseases</i> . 2022;2022:9119930.                                                                                                                                           |
| Khateri 2020    | Khateri, S.; Mohammadi, H.; Khateri, R.; Moradi, Y. The Prevalence of Underlying Diseases and Comorbidities in COVID-19 Patients; an Updated Systematic Review and Meta-analysis. <i>Archives of Academic Emergency Medicine</i> 2020;8(1):e72                                                                                                                                                   |
| Kow 2020        | Kow, C. S.; Hasan, S. S. Mortality risk with preadmission metformin use in patients with COVID-19 and diabetes: A meta-analysis. <i>Journal of Medical Virology</i> . 2020. DOI: 10.1002/jmv.26498                                                                                                                                                                                               |
| Kumar 2020 (1)  | Kumar, A.; Arora, A.; Sharma, P.; Anikhindi, S. A.; Bansal, N.; Singla, V.; Khare, S.; Srivastava, A. Is diabetes mellitus associated with mortality and severity of COVID-19? A meta-analysis. <i>Diabetes &amp; Metabolic Syndrome</i> 2020;14(4):535-545                                                                                                                                      |
| Kumar 2020 (2)  | Kumar, A.; Arora, A.; Sharma, P.; Anikhindi, S. A.; Bansal, N.; Singla, V.; Khare, S.; Srivastava, A. Clinical Features of COVID-19 and Factors Associated with Severe Clinical Course: A Systematic Review and Meta-Analysis. <i>SSRN</i> 2020 Apr 21;3566166.doi: 10.2139/ssrn.3566166. Preprint                                                                                               |
| Kumar 2021      | Kumar R, Rai AK, Phukan MM, Hussain A, Borah D, Gogoi B, et al. Accumulating Impact of Smoking and Co-morbidities on Severity and Mortality of COVID-19 Infection: A Systematic Review and Meta-analysis. <i>Current Genomics</i> . 2021;22(5):339-52.                                                                                                                                           |
| Lee 2020        | Lee, Ming H.; Wong, Chloe; Ng, Cheng H.; Yuen, David C. W.; Lim, Amanda Y. L.; Khoo, Chin M. Effects of hyperglycaemia on complications of COVID-19: A meta-analysis of observational studies. <i>Diabetes Obes Metab</i> 2020. DOI: 10.1111/dom.14184                                                                                                                                           |

| Study ID       | Citation                                                                                                                                                                                                                                                                                                                                                                                                                                              |
|----------------|-------------------------------------------------------------------------------------------------------------------------------------------------------------------------------------------------------------------------------------------------------------------------------------------------------------------------------------------------------------------------------------------------------------------------------------------------------|
| Leretter 2022  | Leretter MT, Vulcanescu DD, Horhat FG, Matichescu A, Ravis M, Rusu LC, et al. COVID-19: Main findings after a year and half of unease and the proper scientific progress (Review). <i>Experimental &amp; Therapeutic Medicine</i> . 2022;23(6):424.                                                                                                                                                                                                   |
| Li 2020 (1)    | Li, J.; Huang, D. Q.; Zou, B.; Yang, H.; Hui, W. Z.; Rui, F.; Yee, N. T. S.; Liu, C.; Nerurkar, S. N.; Kai, J. C. Y.; Teng, M. L. P.; Li, X.; Zeng, H.; Borghi, J. A.; Henry, L.; Cheung, R.; Nguyen, M. H. Epidemiology of COVID-19: A systematic review and meta-analysis of clinical characteristics, risk factors, and outcomes. <i>Journal of Medical Virology</i> 2020 Aug 13;10.1002/jmv.26424. doi: 10.1002/jmv.26424. Online ahead of print. |
| Li 2020 (2)    | Li, P.; Wang, Y.; Peppelenbosch, M. P.; Ma, Z.; Pan, Q. Systematically comparing COVID-19 with 2009 influenza pandemic for hospitalized patients. <i>International Journal of Infectious Diseases</i> 2020;102:375–380                                                                                                                                                                                                                                |
| Li 2020 (3)    | Li, B.; Yang, J.; Zhao, F.; Zhi, L.; Wang, X.; Liu, L.; Bi, Z.; Zhao, Y. Prevalence and impact of cardiovascular metabolic diseases on COVID-19 in China. <i>Clinical Research in Cardiology</i> 2020;109(5):531-538                                                                                                                                                                                                                                  |
| Li 2020 (4)    | Li, J.; He, X.; Yuan, Yuan; Zhang, W.; Li, X.; Zhang, Y.; Li, S.; Guan, C.; Gao, Z.; Dong, G. Meta-analysis investigating the relationship between clinical features, outcomes, and severity of severe acute respiratory syndrome coronavirus 2 (SARS-CoV-2) pneumonia. <i>American Journal of Infection Control</i> 2020;12. DOI: <a href="https://doi.org/10.1016/j.ajic.2020.06.008">https://doi.org/10.1016/j.ajic.2020.06.008</a>                |
| Li 2021 (1)    | Li X, Zhong X, Wang Y, Zeng X, Luo T, Liu Q. Clinical determinants of the severity of COVID-19: A systematic review and meta-analysis. <i>PLoS ONE [Electronic Resource]</i> . 2021;16(5):e0250602.                                                                                                                                                                                                                                                   |
| Li 2021 (2)    | Li Y, Ashcroft T, Chung A, Dighero I, Dozier M, Horne M, et al. Risk factors for poor outcomes in hospitalised COVID-19 patients: A systematic review and meta-analysis. <i>Journal of Global Health</i> . 2021;11:10001.                                                                                                                                                                                                                             |
| Li 2021 (3)    | Li Y, Yang X, Yan P, Sun T, Zeng Z, Li S. Metformin in Patients With COVID-19: A Systematic Review and Meta-Analysis. <i>Frontiers in Medicine</i> . 2021;8:704666.                                                                                                                                                                                                                                                                                   |
| Liu 2020 (1)   | Liu, H.; Chen, S.; Liu, M.; Nie, H.; Lu, H. Comorbid Chronic Diseases are Strongly Correlated with Disease Severity among COVID-19 Patients: A Systematic Review and Meta-Analysis. <i>Aging &amp; Disease</i> 2020;11(3):668-678                                                                                                                                                                                                                     |
| Liu 2020 (2)   | Liu, Y.; Wu, S.; Qin, M.; Jiang, W.; Liu, X. Prevalence of Cardiovascular Comorbidities in Coronavirus Disease 2019, Severe Acute Respiratory Syndrome, and Middle East Respiratory Syndrome: Pooled Analysis of Published Data. <i>Journal of the American Heart Association</i> 01 Sep 2020;9(17):e016812                                                                                                                                           |
| Lu 2020        | Lu, L.; Zhong, W.; Bian, Z.; Li, Z.; Zhang, K.; Liang, B.; Zhong, Y.; Hu, M.; Lin, L.; Liu, J.; Lin, X.; Huang, Y.; Jiang, J.; Yang, X.; Zhang, X.; Huang, Z. A comparison of mortality-related risk factors of COVID-19, SARS, and MERS: A systematic review and meta-analysis. <i>Journal of Infection</i> 2020;81(4):e18-e25                                                                                                                       |
| Lukito 2020    | Lukito, A. A.; Pranata, R.; Henrina, J.; Lim, M. A.; Lawrensia, S.; Suastika, K. The Effect of Metformin Consumption on Mortality in Hospitalized COVID-19 patients: a systematic review and meta-analysis. <i>Diabetes and Metabolic Syndrome: Clinical Research and Reviews</i> 01 Nov 2020;14(6):2177-2183                                                                                                                                         |
| Luo 2020       | Luo, L.; Fu, M.; Li, Y.; Hu, S.; Luo, J.; Chen, Z.; Yu, J.; Li, W.; Dong, R.; Yang, Y.; Tu, L.; Xu, X. The potential association between common comorbidities and severity and mortality of coronavirus disease 2019: A pooled analysis. <i>Clinical Cardiology</i> . 2020. DOI: 10.1002/clc.23465                                                                                                                                                    |
| Maddaloni 2021 | Maddaloni E, D'Onofrio L, Siena A, Luordi C, Mignogna C, Amendolara R, et al. Impact of cardiovascular disease on clinical outcomes in hospitalized patients with Covid-19: a systematic review and meta-analysis. <i>Internal &amp; Emergency Medicine</i> . 2021;16(7):1975-85.                                                                                                                                                                     |
| Mahumud 2020   | Mahumud, R. A.; Kamara, J. K.; Renzaho, A. M. N. The epidemiological burden and overall distribution of chronic comorbidities in coronavirus disease-2019 among 202,005 infected patients: evidence from a systematic review and meta-analysis. <i>Infection</i> 2020;48(6):813-833                                                                                                                                                                   |
| Mair 2020      | Mair, M.; Singhavi, H.; Pai, A.; Singhavi, J.; Gandhi, P.; Conboy, P.; Baker, A.; Das, S. A meta-analysis of 67 studies with presenting symptoms & laboratory tests of COVID-19 patients. <i>The Laryngoscope</i> . 2020;17. DOI: 10.1002/lary.29207                                                                                                                                                                                                  |
| Mantovani 2020 | Mantovani, A.; Byrne, C. D.; Zheng, M. H.; Targher, G. Diabetes as a risk factor for greater COVID-19 severity and in-hospital death: A meta-analysis of observational studies. <i>Nutrition Metabolism &amp; Cardiovascular Diseases</i> 2020;30(8):1236-1248                                                                                                                                                                                        |
| Mason 2021     | Mason KE, Maudsley G, McHale P, Pennington A, Day J, Barr B. Age-Adjusted Associations Between Comorbidity and Outcomes of COVID-19: A Review of the Evidence From the Early Stages of the Pandemic. <i>Frontiers in Public Health</i> . 2021;9:584182.                                                                                                                                                                                               |

| Study ID         | Citation                                                                                                                                                                                                                                                                                                                                                             |
|------------------|----------------------------------------------------------------------------------------------------------------------------------------------------------------------------------------------------------------------------------------------------------------------------------------------------------------------------------------------------------------------|
| Matsushita 2020  | Matsushita, K.; Ding, N.; Kou, M.; Hu, X.; Chen, M.; Gao, Y.; Honda, Y.; Zhao, D.; Dowdy, D.; Mok, Y.; Ishigami, J.; Appel, L. J. The Relationship of COVID-19 Severity with Cardiovascular Disease and Its Traditional Risk Factors: A Systematic Review and Meta-Analysis. <i>Global heart</i> 2020;15(1):64                                                       |
| Mattey-Mora 2022 | Mattey-Mora PP, Begle CA, Owusu CK, Chen C, Parker MA. Hospitalised versus outpatient COVID-19 patients' background characteristics and comorbidities: A systematic review and meta-analysis. <i>Reviews in Medical Virology</i> . 2022;32(3):e2306.                                                                                                                 |
| Mehraeen 2020    | Mehraeen, E.; Karimi, A.; Barzegary, A.; Vahedi, F.; Afsahi, A. M.; Dadras, O.; Moradmand-Badie, B.; Seyed Alinaghi, S. A.; Jahanfar, S. Predictors of mortality in patients with COVID-19-a systematic review. <i>European Journal of Integrative Medicine</i> 2020;40:101226                                                                                       |
| Meng 2020        | Meng, M.; Zhao, Q.; Kumar, R.; Bai, C.; Deng, Y.; Wan, B. Impact of cardiovascular and metabolic diseases on the severity of COVID-19: a systematic review and meta-analysis. <i>Aging</i> 2020;12(22):23409                                                                                                                                                         |
| Meng 2021        | Meng Y, Wang J, Wen K, Da W, Yang K, Zhou S, et al. Clinical Features and Laboratory Examination to Identify Severe Patients with COVID-19: A Systematic Review and Meta-Analysis. <i>BioMed Research International</i> . 2021;2021:6671291.                                                                                                                         |
| Mesas 2020       | Mesas, A. E.; Caverio-Redondo, I.; Alvarez-Bueno, C.; Sarria Cabrera, M. A.; Maffei de Andrade, S.; Sequi-Dominguez, I.; Martinez-Vizcaino, V. Predictors of in-hospital COVID-19 mortality: A comprehensive systematic review and meta-analysis exploring differences by age, sex and health conditions. <i>PLoS ONE [Electronic Resource]</i> 2020;15(11):e0241742 |
| Miller 2020      | Miller, L. E.; Bhattacharyya, R.; Miller, A. L. Diabetes mellitus increases the risk of hospital mortality in patients with Covid-19: Systematic review with meta-analysis. <i>Medicine</i> 2020;99(40):e22439                                                                                                                                                       |
| Minh 2021        | Minh LHN, Abozaid AA, Ha NX, Le Quang L, Gad AG, Tiwari R, et al. Clinical and laboratory factors associated with coronavirus disease 2019 (Covid-19): A systematic review and meta-analysis. <i>Reviews in Medical Virology</i> . 2021;31(6):e2288.                                                                                                                 |
| Mirjalili 2021   | Mirjalili H, Dastgheib SA, Shaker SH, Bahrami R, Mazaheri M, Sadr-Bafghi SMH, et al. Proportion and mortality of Iranian diabetes mellitus, chronic kidney disease, hypertension and cardiovascular disease patients with COVID-19: a meta-analysis. <i>Journal of Diabetes &amp; Metabolic Disorders</i> . 2021;20(1):905-17.                                       |
| Mishra 2021      | Mishra P, Parveen R, Bajpai R, Samim M, Agarwal NB. Impact of cardiovascular diseases on severity of COVID-19 patients: A systematic review. <i>Annals of the Academy of Medicine, Singapore</i> . 2021;50(1):52-60.                                                                                                                                                 |
| Moula 2020       | Moula, A. I.; Micali, L. R.; Matteucci, F.; Luca, F.; Rao, C. M.; Parise, O.; Parise, G.; Gulizia, M. M.; Gelsomino, S. Quantification of death risk in relation to sex, pre-existing cardiovascular diseases and risk factors in COVID-19 patients: Let's take stock and see where we are. <i>Journal of Clinical Medicine</i> September 2020;9(9):1-17             |
| Mudatsir 2020    | Mudatsir M, Fajar JK, Wulandari L et al. Predictors of COVID-19 severity: a systematic review and meta-analysis. <i>F1000Research</i> 2020, 9:1107 <a href="https://doi.org/10.12688/f1000research.26186.1">https://doi.org/10.12688/f1000research.26186.1</a>                                                                                                       |
| Nandy 2020       | Nandy, K.; Salunke, A.; Pathak, S. K.; Pandey, A.; Doctor, C.; Puj, K.; Sharma, M.; Jain, A.; Warikoo, V. Coronavirus disease (COVID-19): A systematic review and meta-analysis to evaluate the impact of various comorbidities on serious events. <i>Diabetes &amp; Metabolic Syndrome</i> 2020;14(5):1017-1025                                                     |
| Nassar 2021      | Nassar M, Nso N, Baraka B, Alfshawy M, Mohamed M, Nyabera A, et al. The association between COVID-19 and type 1 diabetes mellitus: A systematic review. <i>Diabetes &amp; Metabolic Syndrome</i> . 2021;15(1):447-54.                                                                                                                                                |
| Ng 2021          | Ng WH, Tipih T, Makoah NA, Vermeulen JG, Goedhals D, Sempa JB, et al. Comorbidities in SARS-CoV-2 Patients: a Systematic Review and Meta-Analysis. <i>mBio</i> . 2021;12(1):09.                                                                                                                                                                                      |
| Ng 2022          | Ng SM, Pan J, Mouyis K, Kondapally Seshasai SR, Kapil V, Rice KM, et al. Quantifying the Excess Risk of Adverse COVID-19 Outcomes in Unvaccinated Individuals With Diabetes Mellitus, Hypertension, Ischaemic Heart Disease or Myocardial Injury: A Meta-Analysis. <i>Frontiers in Cardiovascular Medicine</i> . 2022;9:871151.                                      |
| Nguyen 2022      | Nguyen NN, Ho DS, Nguyen HS, Ho DKN, Li HY, Lin CY, et al. Preadmission use of antidiabetic medications and mortality among patients with COVID-19 having type 2 diabetes: A meta-analysis. <i>Metabolism: Clinical &amp; Experimental</i> . 2022;131:155196.                                                                                                        |
| Nikoloski 2021   | Nikoloski Z, Alqunaibet AM, Alfawaz RA, Almudarra SS, Herbst CH, El-Saharty S, et al. Covid-19 and non-communicable diseases: evidence from a systematic literature review. <i>BMC Public Health</i> . 2021;21(1):1068.                                                                                                                                              |
| Noor 2020        | Noor, F. M.; Islam, M. M. Prevalence and Associated Risk Factors of Mortality Among COVID-19 Patients: A Meta-Analysis. <i>Journal of community health</i> 01 Dec 2020;45(6):1270-1282                                                                                                                                                                               |

| Study ID                | Citation                                                                                                                                                                                                                                                                                                                                                                                                                                            |
|-------------------------|-----------------------------------------------------------------------------------------------------------------------------------------------------------------------------------------------------------------------------------------------------------------------------------------------------------------------------------------------------------------------------------------------------------------------------------------------------|
| Ogungbe 2021            | Ogungbe O, Kumbe B, Fadodun O, T L, Meyer D, Asala A, et al. Subclinical Myocardial Injury, Coagulopathy, and Inflammation in COVID-19: A Meta-Analysis of 41,013 Hospitalized Patients. SSRN; 2021.                                                                                                                                                                                                                                                |
| Pal 2020                | Pal, R.; Banerjee, M.; Yadav, U.; Bhattacharjee, S. Clinical profile and outcomes in COVID-19 patients with diabetic ketoacidosis: A systematic review of literature. Diabetes & Metabolic Syndrome 2020;14(6):1563-1569                                                                                                                                                                                                                            |
| Pal 2021                | Pal R, Banerjee M, Mukherjee S, Bhogal RS, Kaur A, Bhadada SK. Dipeptidyl peptidase-4 inhibitor use and mortality in COVID-19 patients with diabetes mellitus: an updated systematic review and meta-analysis. Therapeutic Advances in Endocrinology & Metabolism. 2021;12:2042018821996482.                                                                                                                                                        |
| Palaiodimos 2020        | Palaiodimos, L.; Chamorro-Pareja, N.; Karamanis, D.; Li, W.; Zavras, P. D.; Chang, K. M.; Mathias, P.; Kokkinidis, D. G. Diabetes is associated with increased risk for in-hospital mortality in patients with COVID-19: a systematic review and meta-analysis comprising 18,506 patients. Hormones 2020. <a href="https://doi.org/10.1007/s42000-020-00246-2">https://doi.org/10.1007/s42000-020-00246-2</a>                                       |
| Pandey 2022             | Pandey R, Rai D, Tahir MW, Wahab A, Bandyopadhyay D, Lesho E, et al. Prevalence of comorbidities and symptoms stratified by severity of illness amongst adult patients with COVID-19: a systematic review. Archives of Medical Sciences Atherosclerotic Diseases. 2022;7:e5-e23.                                                                                                                                                                    |
| Papadopoulos 2021       | Papadopoulos VP, Koutroulos MV, Zikoudi DG, Bakola SA, Avramidou P, Touzlatzi N, et al. Diabetes-related acute metabolic emergencies in COVID-19 patients: a systematic review and meta-analysis. Diabetology International. 2021;12(4):445-59.                                                                                                                                                                                                     |
| Parohan 2020            | Parohan, M.; Yaghoubi, S.; Seraji, A.; Javanbakht, M. H.; Sarraf, P.; Djalali, M. Risk factors for mortality in patients with Coronavirus disease 2019 (COVID-19) infection: a systematic review and meta-analysis of observational studies. Aging Male 2020. DOI: 10.1080/13685538.2020.17747                                                                                                                                                      |
| Parveen 2020            | Parveen, R.; Sehar, N.; Bajpai, R.; Agarwal, N. B. Association of diabetes and hypertension with disease severity in covid-19 patients: A systematic literature review and exploratory meta-analysis. Diabetes Research & Clinical Practice 2020;166:108295                                                                                                                                                                                         |
| Patel 2020 (1)          | Patel, U.; Malik, P.; Mehta, D.; Shah, D.; Kelkar, R.; Pinto, C.; Suprun, M.; Dhamoon, M.; Hennig, N.; Sacks, H. Early epidemiological indicators, outcomes, and interventions of COVID-19 pandemic: A systematic review. Journal of Global Health 2020;10(2):020506                                                                                                                                                                                |
| Patel 2020 (2)          | Patel, U.; Malik, P.; Usman, M. S.; Mehta, D.; Sharma, A.; Malik, F. A.; Khan, N.; Siddiqi, T. J.; Ahmed, J.; Patel, A.; Sacks, H. Age-Adjusted Risk Factors Associated with Mortality and Mechanical Ventilation Utilization Amongst COVID-19 Hospitalizations-a Systematic Review and Meta-Analysis. SN Comprehensive Clinical Medicine 2020. <a href="https://doi.org/10.1007/s42399-020-00476-w">https://doi.org/10.1007/s42399-020-00476-w</a> |
| Patoulis 2021           | Patoulis D, Doumas M. Dipeptidyl Peptidase-4 Inhibitors and COVID-19-Related Deaths among Patients with Type 2 Diabetes Mellitus: A Meta-Analysis of Observational Studies. Endocrinology and Metabolism. 2021;36(4):904-8.                                                                                                                                                                                                                         |
| Pellicori 2021          | Pellicori P, Doolub G, Wong CM, Lee KS, Mangion K, Ahmad M, et al. COVID-19 and its cardiovascular effects: a systematic review of prevalence studies. Cochrane Database of Systematic Reviews. 2021;3:CD013879.                                                                                                                                                                                                                                    |
| Peterfi 2022            | Peterfi A, Meszaros A, Szarvas Z, Penzes M, Fekete M, Feher A, et al. Comorbidities and increased mortality of COVID-19 among the elderly: A systematic review. Physiology International. 2022;16:16.                                                                                                                                                                                                                                               |
| Pinedo-Torres 2020      | Pinedo-Torres, I.; Flores-Fernandez, M.; Yovera-Aldana, M.; Gutierrez-Ortiz, C.; Zegarra-Lizana, P.; Intimayta-Escalante, C.; Moran-Marinos, C.; Alva-Diaz, C.; Pacheco-Barrios, K. Prevalence of Diabetes Mellitus and Its Associated Unfavorable Outcomes in Patients With Acute Respiratory Syndromes Due to Coronaviruses Infection: A Systematic Review and Meta-Analysis. Clinical Medicine Insights 2020;13:1179551420962495                 |
| Pinto 2020              | Pinto, L. C.; Bertoluci, M. C. Type 2 diabetes as a major risk factor for COVID-19 severity: a meta-analysis. Archives of Endocrinology & Metabolism 2020;64(3):199-200                                                                                                                                                                                                                                                                             |
| Pizuorno 2021           | Pizuorno A, Fierro NA, Copado-Villagrana ED, Herrera-Solis ME, Oskrochi G, Brim H, et al. COVID-19 and gastrointestinal symptoms in Mexico, a systematic review: does location matter? BMC Infectious Diseases. 2021;21(1):555.                                                                                                                                                                                                                     |
| Plasencia-Urizarri 2020 | Plasencia-Urizarri, T. M.; Aguilera-Rodriguez, R.; Almaguer-Mederos, L. E. Comorbidities and clinical severity of COVID-19: systematic review and meta-analysis. [Spanish]. Revista Habanera de Ciencias Medicas 2020;19(sUPL.):e3389.                                                                                                                                                                                                              |

| Study ID          | Citation                                                                                                                                                                                                                                                                                                                                                   |
|-------------------|------------------------------------------------------------------------------------------------------------------------------------------------------------------------------------------------------------------------------------------------------------------------------------------------------------------------------------------------------------|
| Poly 2021 (1)     | Poly TN, Islam MM, Li YJ, Lin MC, Hsu MH, Wang YC. Metformin Use Is Associated with Decreased Mortality in COVID-19 Patients with Diabetes: Evidence from Retrospective Studies and Biological Mechanism. <i>Journal of Clinical Medicine</i> . 2021;10(16):09.                                                                                            |
| Poly 2021 (2)     | Poly TN, Islam MM, Yang HC, Lin MC, Jian WS, Hsu MH, et al. Obesity and Mortality Among Patients Diagnosed With COVID-19: A Systematic Review and Meta-Analysis. <i>Frontiers in Medicine</i> . 2021;8:620044.                                                                                                                                             |
| Prattichizzo 2022 | Prattichizzo F, de Candia P, Nicolucci A, Ceriello A. Elevated HbA1c levels in pre-Covid-19 infection increases the risk of mortality: A systematic review and meta-analysis. <i>Diabetes/Metabolism Research Reviews</i> . 2022;38(1):e3476.                                                                                                              |
| Puri 2022         | Puri A, He L, Giri M, Wu C, Zhao Q. Comparison of comorbidities among severe and non-severe COVID-19 patients in Asian versus non-Asian populations: A systematic review and meta-analysis. <i>Nursing Open</i> . 2022;9(1):733-51.                                                                                                                        |
| Qui 2020          | Qiu, P., Zhou, Y., Wang, F. et al. Clinical characteristics, laboratory outcome characteristics, comorbidities, and complications of related COVID-19 deceased: a systematic review and meta-analysis. <i>Aging Clin Exp Res</i> 32, 1869–1878 (2020). <a href="https://doi.org/10.1007/s40520-020-01664-3">https://doi.org/10.1007/s40520-020-01664-3</a> |
| Radwan 2020       | Radwan NM, Mahmoud NE, Alfaifi AH, Alabdulkareem KI. Comorbidities and severity of coronavirus disease 2019 patients. <i>Saudi Med J</i> . 2020 Nov;41(11):1165-1174. doi: 10.15537/smj.2020.11.25454.                                                                                                                                                     |
| Rahman 2021 (1)   | Rahman A, Sathi NJ. Risk factors of the severity of COVID-19: A meta-analysis. <i>International Journal of Clinical Practice</i> . 2021;75(7):e13916.                                                                                                                                                                                                      |
| Rahman 2021 (2)   | Rahman MM, Bhattacharjee B, Farhana Z, Hamiduzzaman M, Chowdhury MAB, Hossain MS, et al. Age-related risk factors and severity of SARS-CoV-2 infection: a systematic review and meta-analysis. <i>Journal of Preventive Medicine &amp; Hygiene</i> . 2021;62(2):E329-E71.                                                                                  |
| Rahmati 2022      | Rahmati M, Keshvari M, Mirnasuri S, Yon DK, Lee SW, Il Shin J, et al. The global impact of COVID-19 pandemic on the incidence of pediatric new-onset type 1 diabetes and ketoacidosis: A systematic review and meta-analysis. <i>Journal of Medical Virology</i> . 2022;94(11):5112-27.                                                                    |
| Rakhmat 2021      | Rakhmat, II, Kusmala YY, Handayani DR, Juliastuti H, Nawangsih EN, Wibowo A, et al. Dipeptidyl peptidase-4 (DPP-4) inhibitor and mortality in coronavirus disease 2019 (COVID-19) - A systematic review, meta-analysis, and meta-regression. <i>Diabetes &amp; Metabolic Syndrome</i> . 2021;15(3):777-82.                                                 |
| Rico-Martin 2021  | Rico-Martin S, Calderon-Garcia JF, Basilio-Fernandez B, Clavijo-Chamorro MZ, Sanchez Munoz-Torrero JF. Metabolic Syndrome and Its Components in Patients with COVID-19: Severe Acute Respiratory Syndrome (SARS) and Mortality. A Systematic Review and Meta-Analysis. <i>Journal of Cardiovascular Development &amp; Disease</i> . 2021;8(12):25.         |
| Rod 2020          | Rod, J. E.; Oviedo-Trespalacios, Oscar; Cortes-Ramirez, Javier. A brief-review of the risk factors for covid-19 severity. <i>Rev Saude Publica</i> 2020;54:60                                                                                                                                                                                              |
| Roncon 2020       | Roncon, L.; Zuin, M.; Rigatelli, G.; Zuliani, G. Diabetic patients with COVID-19 infection are at higher risk of ICU admission and poor short-term outcome. <i>Journal of Clinical Virology</i> 2020;127():104354                                                                                                                                          |
| Sacks 2020        | Sacks, L. J.; Pham, C. T.; Fleming, N.; Neoh, S. L.; Ekinci, E. I. Considerations for people with diabetes during the Coronavirus Disease (COVID-19) pandemic. <i>Diabetes Research &amp; Clinical Practice</i> 2020;166:108296                                                                                                                            |
| Saha 2021         | Saha S, Al-Rifai RH, Saha S. Diabetes prevalence and mortality in COVID-19 patients: a systematic review, meta-analysis, and meta-regression. <i>Journal of Diabetes &amp; Metabolic Disorders</i> . 2021;20(1):939-50.                                                                                                                                    |
| Sahni 2021        | Sahni S, Gupta G, Sarda R, Pandey S, Pandey RM, Sinha S. Impact of metabolic and cardiovascular disease on COVID-19 mortality: A systematic review and meta-analysis. <i>Diabetes &amp; Metabolic Syndrome</i> . 2021;15(6):102308.                                                                                                                        |
| Sahu 2021         | Sahu AK, Mathew R, Aggarwal P, Nayer J, Bhoi S, Satapathy S, et al. Clinical Determinants of Severe COVID-19 Disease - A Systematic Review and Meta-Analysis. <i>Journal of global infectious diseases</i> . 2021;13(1):13-9.                                                                                                                              |
| Saleh 2021        | Saleh YM, Fiolet T, Rebeaud ME, Mulot M, Guihur A, Fatouhi DE, et al. Diabetes, Hypertension, Body Mass Index, Smoking and COVID-19-Related Mortality: A Systematic Review and Meta-Analysis of Observational Studies. <i>SSRN</i> ; 2021.                                                                                                                 |
| Sales-Peres 2020  | Sales-Peres, S. H. C.; de Azevedo-Silva, L. J.; Bonato, R. C. S.; Sales-Peres, M. C.; Pinto, Acds; Santiago Junior, J. F. Coronavirus (SARS-CoV-2) and the risk of obesity for critically illness and ICU admitted: Meta-analysis of the epidemiological evidence. <i>Obesity Research &amp; Clinical Practice</i> 2020;14(5):389-397                      |

| Study ID         | Citation                                                                                                                                                                                                                                                                                                                                                           |
|------------------|--------------------------------------------------------------------------------------------------------------------------------------------------------------------------------------------------------------------------------------------------------------------------------------------------------------------------------------------------------------------|
| Sanyaolu 2020    | Sanyaolu, Adekunle; Okorie, Chuku; Marinkovic, Aleksandra; Patidar, Risha; Younis, Kokab; Desai, Priyank; Hosein, Zaheeda; Padda, Inderbir; Mangat, Jasmine; Altaf, Mohsin<br>Comorbidity and its Impact on Patients with COVID-19. SN Compr Clin Med 2020.<br><a href="https://doi.org/10.1007/s42399-020-00363-4">https://doi.org/10.1007/s42399-020-00363-4</a> |
| Sathish 2020     | Sathish, T.; Kapoor, N.; Cao, Y.; Tapp, R. J.; Zimmet, P. Proportion of newly diagnosed diabetes in COVID-19 patients: a systematic review and meta-analysis. Diabetes, Obesity & Metabolism 2020;27():27                                                                                                                                                          |
| Sathish 2021     | Sathish T, Cao Y. Is newly diagnosed diabetes as frequent as preexisting diabetes in COVID-19 patients? Diabetes & Metabolic Syndrome. 2021;15(1):147-8.                                                                                                                                                                                                           |
| Sayed 2020       | S.Sayed, COVID-19 and diabetes; Possible role of polymorphism and rise of telemedicine, Prim.Care Diab.(2020), <a href="https://doi.org/10.1016/j.pcd.2020.08.018">https://doi.org/10.1016/j.pcd.2020.08.018</a>                                                                                                                                                   |
| Schlesinger 2021 | Schlesinger S, Neuenschwander M, Lang A, Pafili K, Kuss O, Herder C, et al. Risk phenotypes of diabetes and association with COVID-19 severity and death: a living systematic review and meta-analysis. Diabetologia. 2021;64(7):1480-91.                                                                                                                          |
| Sepandi 2020     | Sepandi, M.; Taghdir, M.; Alimohamadi, Y.; Afrashteh, S.; Hosamirudsari, H. Factors Associated with Mortality in COVID-19 Patients: A Systematic Review and Meta-Analysis. Iranian Journal of Public Health 2020;49(7):1211-1221                                                                                                                                   |
| Shafiee 2022     | Shafiee A, Teymouri Athar MM, Nassar M, Seighali N, Aminzade D, Fattahi P, et al. Comparison of COVID-19 outcomes in patients with Type 1 and Type 2 diabetes: A systematic review and meta-analysis. Diabetes & Metabolic Syndrome. 2022;16(6):102512.                                                                                                            |
| Shang 2020       | Shang L, Shao M, Guo Q, et al. Diabetes Mellitus is Associated with Severe Infection and Mortality in Patients with COVID-19: A Systematic Review and Meta-analysis. Arch Med Res, 2020;.<br><a href="https://doi.org/10.1016/j.arcmed.2020.07.005">https://doi.org/10.1016/j.arcmed.2020.07.005</a> . Online ahead of print.                                      |
| Shoar 2020       | Shoar, S.; Hosseini, F.; Naderan, M.; Mehta, J. L. Meta-analysis of Cardiovascular Events and Related Biomarkers Comparing Survivors Versus Non-survivors in Patients With COVID-19. American Journal of Cardiology 2020;135:50-61                                                                                                                                 |
| Shrestha 2021    | Shrestha DB, Budhathoki P, Raut S, Adhikari S, Ghimire P, Thapaliya S, et al. New-onset diabetes in COVID-19 and clinical outcomes: A systematic review and meta-analysis. World Journal of Virology. 2021;10(5):275-87.                                                                                                                                           |
| Sian 2021        | Sian A Bradley MBNAISSMMB. Prevalence and impact of diabetes in hospitalized COVID-19 patients: A systematic review and meta-analysis. Journal Of Diabetes. 2021;144-57.                                                                                                                                                                                           |
| Singh 2020 (1)   | Singh, A. K.; Gupta, R.; Misra, A. Comorbidities in COVID-19: Outcomes in hypertensive cohort and controversies with renin angiotensin system blockers. Diabetes & Metabolic Syndrome 2020;14(4):283-287                                                                                                                                                           |
| Singh 2020 (2)   | Singh, A. K.; Gillies, C. L.; Singh, R.; Singh, A.; Chudasama, Y.; Coles, B.; Seidu, S.; Zaccardi, F.; Davies, M. J.; Khunti, K. Prevalence of co-morbidities and their association with mortality in patients with COVID-19: A systematic review and meta-analysis. Diabetes, Obesity & Metabolism 2020;22:1915–1924                                              |
| Singh 2020 (3)   | Singh AK, Gupta R, Ghosh A, Misra A. Diabetes in COVID-19: Prevalence, pathophysiology, prognosis and practical considerations. Diabetes Metab Syndr. 2020 Jul-Aug;14(4):303-310. doi: 10.1016/j.dsx.2020.04.004. Epub 2020 Apr 9.                                                                                                                                 |
| Silverio 2021    | Silverio A, Di Maio M, Citro R, Esposito L, Iuliano G, Bellino M, et al. Cardiovascular risk factors and mortality in hospitalized patients with COVID-19: systematic review and meta-analysis of 45 studies and 18,300 patients. BMC Cardiovascular Disorders. 2021;21(1):23.                                                                                     |
| Singhal 2021     | Singhal S, Kumar P, Singh S, Saha S, Dey AB. Clinical features and outcomes of COVID-19 in older adults: a systematic review and meta-analysis. BMC Geriatrics. 2021;21(1):321.                                                                                                                                                                                    |
| Ssentongo 2020   | Ssentongo, P.; Ssentongo, A. E.; Heilbrunn, E. S.; Ba, D. M.; Chinchilli, V. M. Association of cardiovascular disease and 10 other pre-existing comorbidities with COVID-19 mortality: A systematic review and meta-analysis. PLoS ONE [Electronic Resource] 2020;15(8):e0238215                                                                                   |
| Subramaniam 2021 | Subramaniam A, Lim ZJ, Ponnappa Reddy M, Shekar K. Systematic review and meta-analysis of the characteristics and outcomes of readmitted COVID-19 survivors. Internal Medicine Journal. 2021;51(11):1773-80.                                                                                                                                                       |
| Tadic 2020       | Tadic, Marijana; Cuspidi, Cesare; Sala, Carla. COVID-19 and diabetes: Is there enough evidence? J Clin Hypertens (Greenwich) 2020. DOI: 10.1111/jch.13912                                                                                                                                                                                                          |
| Tan 2020         | Tan, E.; Song, J.; Deane, A. M.; Plummer, M. P. Global impact of COVID-19 infection requiring admission to the intensive care unit: a systematic review and meta-analysis. Chest. 2020. DOI: <a href="https://doi.org/10.1016/j.chest.2020.10.014">https://doi.org/10.1016/j.chest.2020.10.014</a>                                                                 |



| Study ID                  | Citation                                                                                                                                                                                                                                                                                                                                                                                                                                                              |
|---------------------------|-----------------------------------------------------------------------------------------------------------------------------------------------------------------------------------------------------------------------------------------------------------------------------------------------------------------------------------------------------------------------------------------------------------------------------------------------------------------------|
| Taylor 2021               | Taylor EH, Marson EJ, Elhadi M, Macleod KDM, Yu YC, Davids R, et al. Factors associated with mortality in patients with COVID-19 admitted to intensive care: a systematic review and meta-analysis. <i>Anaesthesia</i> . 2021;76(9):1224-32.                                                                                                                                                                                                                          |
| Thakur 2021               | Thakur B, Dubey P, Benitez J, Torres JP, Reddy S, Shokar N, et al. A systematic review and meta-analysis of geographic differences in comorbidities and associated severity and mortality among individuals with COVID-19. <i>Scientific Reports</i> . 2021;11(1):8562.                                                                                                                                                                                               |
| Tian 2020                 | Tian, W.; Jiang, W.; Yao, J.; Nicholson, C. J.; Li, R. H.; Sigurslid, H. H.; Wooster, L.; Rotter, J. I.; Guo, X.; Malhotra, R. Predictors of mortality in hospitalized COVID-19 patients: A systematic review and meta-analysis. <i>Journal of Medical Virology</i> 2020;05():22                                                                                                                                                                                      |
| Tisminetzky 2022          | Tisminetzky M, Delude C, Hebert T, Carr C, Goldberg RJ, Gurwitz JH. Age, Multiple Chronic Conditions, and COVID-19: A Literature Review. <i>Journals of Gerontology Series A-Biological Sciences &amp; Medical Sciences</i> . 2022;77(4):872-8.                                                                                                                                                                                                                       |
| Treskova-Schwarzbach 2021 | Treskova-Schwarzbach M, Haas L, Reda S, Pilic A, Borodova A, Karimi K, et al. Pre-existing health conditions and severe COVID-19 outcomes: an umbrella review approach and meta-analysis of global evidence. <i>BMC Medicine</i> . 2021;19(1):212.                                                                                                                                                                                                                    |
| Vardavas 2022             | Vardavas CI, Mathioudakis AG, Nikitara K, Stamatelopoulos K, Georgiopoulos G, Phalkey R, Leonardi-Bee J, Fernandez E, Carnicer-Pont D, Vestbo J, Semenza JC, Deogan C, Suk JE, Kramarz P, Lamb F, Penttinen P. Prognostic factors for mortality, intensive care unit and hospital admission due to SARS-CoV-2: a systematic review and meta-analysis of cohort studies in Europe. <i>Eur Respir Rev</i> . 2022 Nov 2;31(166):220098. doi: 10.1183/16000617.0098-2022. |
| Varikasuvu 2020           | Varikasuvu, S. R.; Dutt, N.; Thangappazham, B.; Varshney, S. Diabetes and COVID-19: A pooled analysis related to disease severity and mortality. <i>Primary Care Diabetes</i> . 2020. <a href="https://doi.org/10.1016/j.pcd.2020.08.015">https://doi.org/10.1016/j.pcd.2020.08.015</a>                                                                                                                                                                               |
| Venkata 2020              | Venkata, V. S.; Kiernan, G. Covid-19 and Copd: Pooled Analysis of Observational Studies. <i>Chest</i> October 2020;158 (4 Supplement):A2469                                                                                                                                                                                                                                                                                                                           |
| Wang 2020 (1)             | Wang, Xinhui; Fang, Xuexian; Cai, Zhaoxian; Wu, Xiaotian; Gao, Xiaotong; Min, Junxia; Wang, Fudi. Comorbid Chronic Diseases and Acute Organ Injuries Are Strongly Correlated with Disease Severity and Mortality among COVID-19 Patients: A Systemic Review and Meta-Analysis. <i>Research (Wash D C)</i> 2020. <a href="https://doi.org/10.34133/2020/2402961">https://doi.org/10.34133/2020/2402961</a>                                                             |
| Wang 2020 (2)             | Wang B, Li R, Lu Z, Huang Y. Does comorbidity increase the risk of patients with COVID-19: evidence from meta-analysis. <i>Aging (Albany NY)</i> . 2020; 12:6049-6057. <a href="https://doi.org/10.18632/aging.103000">https://doi.org/10.18632/aging.103000</a>                                                                                                                                                                                                      |
| Wang 2020 (3)             | Wang, X.; Wang, S.; Sun, L.; Qin, G. Prevalence of diabetes mellitus in 2019 novel coronavirus: A meta-analysis. <i>Diabetes Research &amp; Clinical Practice</i> 2020;164():108200                                                                                                                                                                                                                                                                                   |
| Wang 2022                 | Wang W, Sun Y, Wang S, Sun Y. The Relationship Between Insulin Use And Increased Mortality In Patients With COVID-19 And Diabetes: A Meta-Analysis. <i>Endocrine Research</i> . 2022;47(1):32-8.                                                                                                                                                                                                                                                                      |
| Wicaksana 2020            | Wicaksana, Anggi Lukman; Hertanti, Nuzul Sri; Ferdiana, Astri; Pramono, Raden Bowo. Diabetes management and specific considerations for patients with diabetes during coronavirus diseases pandemic: A scoping review. <i>Diabetes Metab Syndr</i> 2020. <a href="https://doi.org/10.1016/j.dsx.2020.06.070">https://doi.org/10.1016/j.dsx.2020.06.070</a>                                                                                                            |
| Wingert 2021              | Wingert A, Pillay J, Gates M, Guitard S, Rahman S, Beck A, et al. Risk factors for severity of COVID-19: a rapid review to inform vaccine prioritisation in Canada. <i>BMJ Open</i> . 2021;11(5):e044684.                                                                                                                                                                                                                                                             |
| Wu 2020                   | Wu, Z. H.; Tang, Y.; Cheng, Q. Diabetes increases the mortality of patients with COVID-19: a meta-analysis. <i>Acta Diabetologica</i> . 2020. <a href="https://doi.org/10.1007/s00592-020-01546-0">https://doi.org/10.1007/s00592-020-01546-0</a>                                                                                                                                                                                                                     |
| Wu 2021                   | Wu Y, Li H, Zhang Z, Liang W, Zhang T, Tong Z, et al. Risk factors for mortality of coronavirus disease 2019 (COVID-19) patients during the early outbreak of COVID-19: a systematic review and meta-analysis. <i>Annals of Palliative Medicine</i> . 2021;10(5):5069-83.                                                                                                                                                                                             |
| Xiang 2021                | Xiang G, Xie L, Chen Z, Hao S, Fu C, Wu Q, et al. Clinical risk factors for mortality of hospitalized patients with COVID-19: systematic review and meta-analysis. <i>Annals of Palliative Medicine</i> . 2021;10(3):2723-35.                                                                                                                                                                                                                                         |
| Xie 2021                  | Xie J, Wang Q, Xu Y, Zhang T, Chen L, Zuo X, et al. Clinical characteristics, laboratory abnormalities and CT findings of COVID-19 patients and risk factors of severe disease: a systematic review and meta-analysis. <i>Annals of Palliative Medicine</i> . 2021;10(2):1928-49.                                                                                                                                                                                     |
| Xu 2020                   | Xu, L.; Mao, Y.; Chen, G. Risk factors for 2019 novel coronavirus disease (COVID-19) patients progressing to critical illness: a systematic review and meta-analysis. <i>Aging</i> 2020;12(12):12410-12421                                                                                                                                                                                                                                                            |
| Yanai 2020                | Yanai, Hidekatsu. Metabolic Syndrome and COVID-19. <i>Cardiol Res</i> 2020;11(6):360-365                                                                                                                                                                                                                                                                                                                                                                              |

| Study ID          | Citation                                                                                                                                                                                                                                                                                          |
|-------------------|---------------------------------------------------------------------------------------------------------------------------------------------------------------------------------------------------------------------------------------------------------------------------------------------------|
| Yang 2020         | Yang, J.; Zheng, Y.; Gou, X.; Pu, K.; Chen, Z.; Guo, Q.; Ji, R.; Wang, H.; Wang, Y.; Zhou, Y. Prevalence of comorbidities and its effects in patients infected with SARS-CoV-2: a systematic review and meta-analysis. <i>International Journal of Infectious Diseases</i> 2020;94:91-95          |
| Yang 2021 (1)     | Yang W, Sun X, Zhang J, Zhang K. The effect of metformin on mortality and severity in COVID-19 patients with diabetes mellitus. <i>Diabetes Research &amp; Clinical Practice</i> . 2021;178:108977.                                                                                               |
| Yang 2021 (2)     | Yang Y, Cai Z, Zhang J. DPP-4 inhibitors may improve the mortality of coronavirus disease 2019: A meta-analysis. <i>PLoS ONE [Electronic Resource]</i> . 2021;16(5):e0251916.                                                                                                                     |
| Yang 2021 (3)     | Yang Y, Cai Z, Zhang J. Insulin Treatment May Increase Adverse Outcomes in Patients With COVID-19 and Diabetes: A Systematic Review and Meta-Analysis. <i>Frontiers in Endocrinology</i> . 2021;12:696087.                                                                                        |
| Yifan 2020        | Yifan, C.; Jun, P. Understanding the Clinical Features of Coronavirus Disease 2019 From the Perspective of Aging: A Systematic Review and Meta-Analysis. <i>Frontiers in Endocrinology</i> 2020;11:557333                                                                                         |
| Yin 2021 (1)      | Yin T, Li Y, Ying Y, Luo Z. Prevalence of comorbidity in Chinese patients with COVID-19: systematic review and meta-analysis of risk factors. <i>BMC Infectious Diseases</i> . 2021;21(1):200.                                                                                                    |
| Yin 2021 (2)      | Yin Y, Rohli KE, Shen P, Lu H, Liu Y, Dou Q, et al. The epidemiology, pathophysiological mechanisms, and management toward COVID-19 patients with Type 2 diabetes: A systematic review. <i>Primary care diabetes</i> . 2021;15(6):899-909.                                                        |
| Zaki 2020         | Zaki, N.; Alashwal, H.; Ibrahim, S. Association of hypertension, diabetes, stroke, cancer, kidney disease, and high-cholesterol with COVID-19 disease severity and fatality: A systematic review. <i>Diabetes &amp; Metabolic Syndrome</i> 2020;14(5):1133-1142                                   |
| Zangiabadian 2021 | Zangiabadian M, Nejadghaderi SA, Zahmatkesh MM, Hajikhani B, Mirsaeidi M, Nasiri MJ. The Efficacy and Potential Mechanisms of Metformin in the Treatment of COVID-19 in the Diabetics: A Systematic Review. <i>Frontiers in Endocrinology</i> . 2021;12:645194.                                   |
| Zein 2022         | Zein A, Raffaello WM. Dipeptidyl peptidase-4 (DPP-IV) inhibitor was associated with mortality reduction in COVID-19 - A systematic review and meta-analysis. <i>Primary care diabetes</i> . 2022;16(1):162-7.                                                                                     |
| Zeng-Hong 2021    | Zeng-Hong Wu YTQC. Diabetes increases the mortality of patients with COVID-19: a meta-analysis. <i>Acta Diabetologica</i> . 2021:139-44                                                                                                                                                           |
| Zhao 2020 (1)     | Zhao, Xianxian; Zhang, Bili; Li, Pan; Ma, Chaoqun; Gu, Jiawei; Hou, Pan; Guo, Zhifu; Wu, Hong; Bai, Yuan. Incidence, clinical characteristics and prognostic factor of patients with COVID-19: a systematic review and meta-analysis. <i>MedRxiv</i> 2020                                         |
| Zhao 2020 (2)     | Zhao, J.; Li, X.; Gao, Y.; Huang, W. Risk factors for the exacerbation of patients with 2019 Novel Coronavirus: A meta-analysis. <i>International Journal of Medical Sciences</i> 2020;17(12):1744-1750                                                                                           |
| Zheng 2020        | Zheng, Z.; Peng, F.; Xu, B.; Zhao, J.; Liu, H.; Peng, J.; Li, Q.; Jiang, C.; Zhou, Y.; Liu, S.; Ye, C.; Zhang, P.; Xing, Y.; Guo, H.; Tang, W. Risk factors of critical & mortal COVID-19 cases: A systematic literature review and meta-analysis. <i>Journal of Infection</i> 2020;81(2):e16-e25 |
| Zhou 2020 (1)     | Zhou, X.; Cheng, Z.; Shu, D.; Lin, W.; Ming, Z.; Chen, W.; Hu, Y. Characteristics of mortal COVID-19 cases compared to the survivors. <i>Aging</i> 2020, Vol 12, Advance                                                                                                                          |
| Zhou 2020 (2)     | Zhou, Y.; Yang, Q.; Chi, J.; Dong, B.; Lv, W.; Shen, L.; Wang, Y. Comorbidities and the risk of severe or fatal outcomes associated with coronavirus disease 2019: A systematic review and meta-analysis. <i>International Journal of Infectious Diseases</i> 2020;99:47-56                       |
| Zhu 2021          | Zhu Z, Mao Y, Chen G. Predictive value of HbA1c for in-hospital adverse prognosis in COVID-19: A systematic review and meta-analysis. <i>Primary care diabetes</i> . 2021;15(6):910-7.                                                                                                            |

Table 2. Key characteristics of included reviews<sup>1</sup>

| Study ID      | Review objective as stated by authors                                                                                                                      | Inclusion criteria as stated by authors                                                                                                                                                       | Search month (year) | Databases searched                                             | Outcomes reported                                               | # included studies                                                                                            | # part-icipants                                                                     | Setting(s)   | Country(s)                                      |
|---------------|------------------------------------------------------------------------------------------------------------------------------------------------------------|-----------------------------------------------------------------------------------------------------------------------------------------------------------------------------------------------|---------------------|----------------------------------------------------------------|-----------------------------------------------------------------|---------------------------------------------------------------------------------------------------------------|-------------------------------------------------------------------------------------|--------------|-------------------------------------------------|
| Abdi 2020     | This study aims to summarize the evidence about diabetes and COVID-19 outbreak through a systematic review and meta-analysis approach.                     | Studies considered focused on those that reported diabetes in COVID-19 patients.                                                                                                              | 3 (2020)            | Scopus, PubMed, Science direct, and Web of science             | Prevalence, discuss severity and mortality narratively in text. | 27 studies included overall, 18 for pooled analysis for prevalence of diabetes.                               | Not reported                                                                        | Not reported | Majority in China                               |
| Aggarwal 2020 | We carried out a pooled analysis of current studies for evaluating potential associations between DM and infection severity outcomes in COVID-19 patients. | Studies were included if they fulfilled the following criteria: (1) Report history of DM in COVID-19 patients; (2) report outcomes of interest; (3) sample size >10.                          | 3(2020)             | PUBMED, EMBASE and CENTRAL                                     | Severe disease (undefined), death                               | 16 in total<br>12 reporting on severe vs less severe COVID cases<br>4 reporting on non-survivors vs survivors | Severe vs non-severe comparison: 2564<br>Non-survivors vs survivors comparison: 618 | Not reported | China                                           |
| Akbari 2022   | We aimed to determine the characteristics, risk factors, and outcomes associated with readmission in COVID-19 patients                                     | All studies comparing characteristics of readmitted and non-readmitted COVID-19 patients were included. We also included articles reporting the reasons for readmission in COVID-19 patients. | 8 (2021)            | PubMed, Embase, Web of Science, Scopus                         | Readmission with COVID-19                                       | 28                                                                                                            | 68236 overall (4823 readmitted, 63413 not readmitted for total population)          | Hospital     | 14/28 studies from USA                          |
| Aktar 2021    | To determine which comorbidities are associated with severe symptoms and mortality would thus greatly                                                      | For this study, articles that described the clinical characteristics of COVID-19 patients were included, particularly symptoms and comorbidities, along with their prevalence and             | 4 (2020)            | PubMed (Medline), Web of Science, EMBASE, and Cochrane Library | prevalence, severity and mortality                              | 26 studies                                                                                                    | 13400 participants                                                                  | Hospital     | 24 studies from China, 1 from Italy, 1 from USA |

| Study ID         | Review objective as stated by authors                                                                                                                                               | Inclusion criteria as stated by authors                                                                                                                                                                                                                                                                          | Search month (year) | Databases searched                                 | Outcomes reported                     | # included studies | # participants                           | Setting(s)                                                                         | Country(s)                                                                                                   |
|------------------|-------------------------------------------------------------------------------------------------------------------------------------------------------------------------------------|------------------------------------------------------------------------------------------------------------------------------------------------------------------------------------------------------------------------------------------------------------------------------------------------------------------|---------------------|----------------------------------------------------|---------------------------------------|--------------------|------------------------------------------|------------------------------------------------------------------------------------|--------------------------------------------------------------------------------------------------------------|
|                  | assist in COVID-19 care planning and provision.                                                                                                                                     | specific information on the distribution of patients on the basis of severity.                                                                                                                                                                                                                                   |                     |                                                    |                                       |                    |                                          |                                                                                    |                                                                                                              |
| Alhumaid 2021    | To re-evaluate the association of SARS-CoV-2 and development of DKA and analyse the demographic and biochemical parameters and the clinical outcomes in COVID-19 patients with DKA. | Case reports, case series and cohort studies discussing and reporting occurrence of DKA in COVID-19 patients. English language only.                                                                                                                                                                             | 6 (2021)            | Proquest, Medline, Embase, Pubmed, Cinahl          | prevalence and mortality in subgroups | 68 studies         | 639 DKA patients with confirmed COVID-19 | States includes all healthcare settings but mentions hospitalised patients in text | Primarily United States (n = 29), United Kingdom (n = 6), India (n = 6), Peru (n = 5), Saudi Arabia (n = 4), |
| AlirezaAbdi 2021 | To review current evidence and provide guidelines for prevention and treatment of people affected by both COVID-19 and diabetes                                                     | Inclusion of publications that were observational studies, such as cohort, case-report and case-control research. Additionally, we included letters, viewpoints, and review studies that provide further advice about diabetes. Studies considered focused on those that reported diabetes in COVID-19 patients. | 3 (2020)            | Scopus, PubMed, Science direct, and Web of science | prevalence                            | 18 studies in MA   | Not reported for MA                      | Not reported                                                                       | Primarily China                                                                                              |
| Alves 2021       | The objective of this meta-analysis was to evaluate the factors associated with the mortality of elderly Italians diagnosed with                                                    | Primary studies on the mortality of elderly Italians (65 years or more) with a diagnosis of coronavirus were selected, with publications in the English, Italian and Spanish languages included, which                                                                                                           | 7 (2020)            | Pubmed, Embase, Lilacs, Cinahl                     | mortality                             | 5 studies          | Not reported                             | Hospitalised or living in institutions                                             | Italy                                                                                                        |

| Study ID       | Review objective as stated by authors                                                                                                                                                                                              | Inclusion criteria as stated by authors                                                                                                                                                                                                                                                                                                                                                                                                                                                                                                        | Search month (year) | Databases searched                                                                                                                                                                                                                                        | Outcomes reported                                                                            | # included studies      | # part-icipants | Setting(s)                 | Country(s)                                                               |
|----------------|------------------------------------------------------------------------------------------------------------------------------------------------------------------------------------------------------------------------------------|------------------------------------------------------------------------------------------------------------------------------------------------------------------------------------------------------------------------------------------------------------------------------------------------------------------------------------------------------------------------------------------------------------------------------------------------------------------------------------------------------------------------------------------------|---------------------|-----------------------------------------------------------------------------------------------------------------------------------------------------------------------------------------------------------------------------------------------------------|----------------------------------------------------------------------------------------------|-------------------------|-----------------|----------------------------|--------------------------------------------------------------------------|
|                | coronavirus who resided in institutions or who were hospitalized because of the disease.                                                                                                                                           | carried out quantitative and qualitative analyses.                                                                                                                                                                                                                                                                                                                                                                                                                                                                                             |                     |                                                                                                                                                                                                                                                           |                                                                                              |                         |                 |                            |                                                                          |
| Apicella 2020  | Not explicitly stated - overall aim (from title) to understand the reasons for worse outcomes in people with diabetes                                                                                                              | Not explicitly stated                                                                                                                                                                                                                                                                                                                                                                                                                                                                                                                          | 6 (2020)            | PUBMED, and Google Scholar for additional references.                                                                                                                                                                                                     | Prevalence, severity, mortality, glycaemic control, DPP4 - all discussed narratively in text | Not reported            | Not reported    | Not reported               | China, UK, France, Italy                                                 |
| Ashktorab 2021 | We performed a comparative analysis of the clinical characteristics, mortality, and symptoms of the confirmed COVID-19 cases reported in various Latin American countries that have made pertinent information publicly available. | Confirmed diagnosis of COVID-19 as reported by each country and referenced by WHO or cross-checked via World-Meter or Johns Hopkins University COVID-19 dashboard; No distinction about the number of diagnosed cases; No distinction about sex, age, severity of disease, inpatient or outpatient management, data collection date, treatment and outcome. Excluded studies where the cohort was not Latino or Hispanic, studies where the cases were not confirmed by RT-PCR, and studies with incomplete symptoms or comorbidities' report. | 7 (2020)            | PubMed, OVID, Scopus, Google Scholar, LANCOVID (Latin America research network on COVID), and other resources from official health organizations of countries in Latin America such as Ministries of Health, National Institutes of Hygiene, or Hospitals | prevalence and mortality                                                                     | 9 studies (8 countries) | 728282          | Inpatients and outpatients | Peru, Ecuador, Bolivia, Mexico, Chile, Argentina, Venezuela, and Brazil. |

| Study ID     | Review objective as stated by authors                                                                                                                                                           | Inclusion criteria as stated by authors                                                                                                                     | Search month (year) | Databases searched                                                    | Outcomes reported                           | # included studies                       | # part-icipants    | Setting(s)               | Country(s)                                                              |
|--------------|-------------------------------------------------------------------------------------------------------------------------------------------------------------------------------------------------|-------------------------------------------------------------------------------------------------------------------------------------------------------------|---------------------|-----------------------------------------------------------------------|---------------------------------------------|------------------------------------------|--------------------|--------------------------|-------------------------------------------------------------------------|
| Awortwe 2020 | A meta-analysis on COVID-19 clinical studies which characterized the epidemiological or clinical features of affected patients with comorbidities independent of pharmacological interventions. | Selection criteria for the analysis focused exclusively on clinical studies characterizing the clinical or epidemiological features of COVID-19 patients. O | 6 (2020)            | PubMed, Medline, Scopus and google scholar                            | Disease severity, mortality, ICU admission, | 24                                       | 5586               | Not reported             | 1 Iran, 1 Israel, rest china                                            |
| Badawi 2021  | To analyze and compare the profile of COVID-19 cases between China and North America as two regions that differ in many environmental, host and healthcare factors related to disease risk.     | Studies from the Aggregated Dataset of Clinical Outcomes for COVID-19 Patients for China and USA                                                            | 4 (2020)            | Aggregated Dataset of Clinical Outcomes for COVID-19 Patients         | prevalence                                  | 124 studies (105 from China, 19 from USA | 72025              | Not reported             | China and USA                                                           |
| Bae 2021     | We aimed to investigate the impact of cardiovascular disease (CVD) and its risk factors on fatal outcomes according to age in patients with COVID-19.                                           | All observational studies (case series or cohort studies) conducted on in-hospital adult patients with information on clinical outcomes were included.      | 6 (2020)            | PubMed, Embase, medRxiv, Research Square and Lancet preprint database | severe disease and mortality                | 51 studies                               | 48317 participants | Hospital                 | 37 studies from China, 7 from USA, 6 from Italy, 3 from UK, 3 from Iran |
| Bajgain 2020 | To explore prevalence of comorbidities and                                                                                                                                                      | Published primary literature about comorbidities and Covid-                                                                                                 | 5 (2020)            | PubMed, MEDLINE, EMBASE, SCOPUS, google scholar                       | Prevalence in Covid-19 population,          | 27                                       | 22753              | 2 studies from long term | China (18 of 27), S Korea,                                              |



| Study ID       | Review objective as stated by authors                                                                                                                                                                                                                        | Inclusion criteria as stated by authors                                                                                                                                                                                                                                                                                                                                                                   | Search month (year) | Databases searched                                                                                                                                                                               | Outcomes reported                                                             | # included studies                                                 | # participants                                            | Setting(s)               | Country(s)                                |
|----------------|--------------------------------------------------------------------------------------------------------------------------------------------------------------------------------------------------------------------------------------------------------------|-----------------------------------------------------------------------------------------------------------------------------------------------------------------------------------------------------------------------------------------------------------------------------------------------------------------------------------------------------------------------------------------------------------|---------------------|--------------------------------------------------------------------------------------------------------------------------------------------------------------------------------------------------|-------------------------------------------------------------------------------|--------------------------------------------------------------------|-----------------------------------------------------------|--------------------------|-------------------------------------------|
|                | adverse outcomes among individuals with Covid-19                                                                                                                                                                                                             | 19, studies include patient dataset with major comorbidities including HTN, CVD, COPD, CKD, malignancy and/or diabetes                                                                                                                                                                                                                                                                                    |                     |                                                                                                                                                                                                  | association with Covid-19 fatality                                            |                                                                    |                                                           | facilities, rest unclear | Italy, Mexico, US, UK, Iran               |
| Baradaran 2020 | Study assessed prevalence of comorbidities in confirmed COVID-19 patients. Found 11% had diabetes mellitus                                                                                                                                                   | All studies that reported the prevalence of comorbidities among the confirmed COVID-19 patients were included. There was no language restriction                                                                                                                                                                                                                                                          | 4 (2020)            | EMBASE, PubMed, and google scholar                                                                                                                                                               | Prevalence of comorbidities                                                   | 33 studies extracted (29 studies with data on diabetes prevalence) | 9249                                                      | Not reported             | 32 papers from China, 1 paper from Taiwan |
| Barrera 2020   | We systematically assessed the prevalence of diabetes and hypertension in patients with Covid-19 after excluding repeated patients across studies and analysed the associated risks for Covid-19 severity, intensive care unit (ICU) admission and mortality | Observational and interventional studies that reported the frequency of diabetes and/or hypertension in adult population with Covid-19. For our second aim, we included studies that reported exposure-outcome association as univariate or multivariate analysis, with diabetes, hypertension being the exposure, and severe Covid-19 through ICU admissions or mortality being the outcome of interest. | 4 (2020)            | Ovid Medline In-Process & Other Non-Indexed Citations, Ovid Medline, Ovid Embase, Ovid Cochrane Central Register of Controlled Trials, Ovid Cochrane Database of Systematic Reviews, and Scopus. | Prevalence, severity, ICU admission, mortality, subgrouping diabetes plus HTN | 65 studies overall<br>31 studies looked at prevalence of diabetes  | 15,794 overall<br>12,870 looked at prevalence of diabetes | 88% inpatient setting    | 71% from China                            |
| Bennett 2020   | Determine systematically the evidence from studies of more than 100 adult patients that reported                                                                                                                                                             | Studies that report on one or more of: clinical features of patients, comorbidities of patients, radiological findings for patients and outcomes for patients. Sample sizes                                                                                                                                                                                                                               | 4 (2020)            | MEDLINE, EMBASE                                                                                                                                                                                  | Prevalence of diabetes in Covid-19 population                                 | 45                                                                 | 14358                                                     | Hospital admissions      | China (42 of 45), US, Europe              |

| Study ID     | Review objective as stated by authors                                                                                                                                                       | Inclusion criteria as stated by authors                                                                                                                                                                                 | Search month (year) | Databases searched                           | Outcomes reported                                                            | # included studies                                                                                                                   | # participants        | Setting(s)   | Country(s)                                                                                         |
|--------------|---------------------------------------------------------------------------------------------------------------------------------------------------------------------------------------------|-------------------------------------------------------------------------------------------------------------------------------------------------------------------------------------------------------------------------|---------------------|----------------------------------------------|------------------------------------------------------------------------------|--------------------------------------------------------------------------------------------------------------------------------------|-----------------------|--------------|----------------------------------------------------------------------------------------------------|
|              | clinical features and outcomes of those affected by COVID-19.                                                                                                                               | bigger than 100. laboratory confirmed diagnosis of Covid-19                                                                                                                                                             |                     |                                              |                                                                              |                                                                                                                                      |                       |              |                                                                                                    |
| Bepouka 2022 | to determine the mortality rate of COVID-19 among diabetes patients in sub-Saharan Africa                                                                                                   | The analysis excluded commentaries, case reports, family studies, and pediatric studies. Clinical studies that did not clearly state death as a possible consequence were also excluded.                                | 7 (2021)            | PubMed, Google Scholar, and Web of Science   | Mortality                                                                    | 7 studies                                                                                                                            | 7778 participants     | Not reported | Sub Saharan Africa                                                                                 |
| Boddu 2020   | In this review, we explore the mechanisms of hyperglycaemia particularly in relation to COVID 19 illness and also examine the Covid-19 related morbidity and mortality in people with T1DM. | Not explicitly stated                                                                                                                                                                                                   | 10 (2020)           | Medline (PubMed), Scopus, and Google Scholar | Prevalence (new onset), Mortality by HbA1C and by Type 1 and Type 2 diabetes | 2 nationwide analyses in the UK (Mortality Type 1 vs Type 2 and by HbA1C)<br>1 multicentre study in the UK (prevalence of new onset) | Not reported          | Not reported | UK                                                                                                 |
| Bonora 2021  | We focused on the impact of DPP4i treatment on COVID-19-related outcomes in people with DM. For this purpose, we conducted a systematic review and meta-analysis to summarize the           | We included in the analysis all studies reporting separately data for patients with diabetes treated with DPP4i or other GLMs. Published observational (cohort or nested case-control) studies published were included. | 12 (2020)           | Pub-Med, Scopus and Cochrane Library         | association (narrative) and mortality                                        | 12 studies (7 in MA)                                                                                                                 | 6022 patients with DM | Not reported | Italy 4 studies, Korea 2 studies, China 2 studies and one from each France, Spain, Singapore, Iraq |

| Study ID              | Review objective as stated by authors                                                                                                                                                                                                                                                                            | Inclusion criteria as stated by authors                                                                                                                                                                                                                                                                                                                                                        | Search month (year) | Databases searched                                                  | Outcomes reported                           | # included studies                            | # part-icipants                                                                                        | Setting(s)   | Country(s)                                                                                                          |
|-----------------------|------------------------------------------------------------------------------------------------------------------------------------------------------------------------------------------------------------------------------------------------------------------------------------------------------------------|------------------------------------------------------------------------------------------------------------------------------------------------------------------------------------------------------------------------------------------------------------------------------------------------------------------------------------------------------------------------------------------------|---------------------|---------------------------------------------------------------------|---------------------------------------------|-----------------------------------------------|--------------------------------------------------------------------------------------------------------|--------------|---------------------------------------------------------------------------------------------------------------------|
|                       | existing evidence on this topic.                                                                                                                                                                                                                                                                                 |                                                                                                                                                                                                                                                                                                                                                                                                |                     |                                                                     |                                             |                                               |                                                                                                        |              |                                                                                                                     |
| Bradley 2022          | This study sought to determine the prevalence of diabetes in hospitalized COVID-19 patients and investigate the association of diabetes severe COVID-19, rate of acute respiratory distress syndrome (ARDS), mortality, and need for mechanical ventilation by performing a systematic review and meta-analysis. | (a) age $\geq$ 18 years, (b) availability of comparative data between diabetes and non-diabetes groups, (c) patients with a confirmed diagnosis of COVID-19 in a hospital setting, and (d) studies with good methodological design (with appropriate sample size deemed to be $>20$ patients in each group). Relevant data on diabetes or relevant clinical outcomes reported.                 | 7 (2021)            | PubMed, Embase, and Cochrane Central Register of Controlled Trials. | prevalence, severity, mortality             | 24 studies                                    | 10648 patients                                                                                         | hospital     | China 9 studies, Iran 3, S Korea 3, USA 2, India 2 and 1 each from France, Saudi Arabia, Qatar, Italy and Singapore |
| Carrasco-Sanchez 2022 | This consensus aims to clarify the role of Dipeptidyl Peptidase-4 inhibitors (iDPP-4) in managing patients with diabetes during the COVID-19 pandemic                                                                                                                                                            | Various scientific societies were convened, all of them related to the clinical management of diabetes (Spanish Society of Internal Medicine, Society Española de Diabetes, Spanish Society of Endocrinology and Nutrition, and redGDPS Foundation). They posed clinical questions, reviewed the results of the search and analysed the data narratively informed by CEBM grading criteria. No | 2 (2021)            | PubMed                                                              | risk of infection, ICU admission, mortality | 22 studies overall, 8 studies examining DDP4i | For DPP4i - 2 MA (of 9 and 4 studies each) and 6 primary observational studies totalling 7687 patients | Not reported | Not reported                                                                                                        |

| Study ID                        | Review objective as stated by authors                                                                                                                                                                                                                                                | Inclusion criteria as stated by authors                                                                                                                                                         | Search month (year) | Databases searched                                                                                                                                                                                                                                                | Outcomes reported                                                                                                                               | # included studies                                   | # part-icipants                                                                     | Setting(s)   | Country(s)                     |
|---------------------------------|--------------------------------------------------------------------------------------------------------------------------------------------------------------------------------------------------------------------------------------------------------------------------------------|-------------------------------------------------------------------------------------------------------------------------------------------------------------------------------------------------|---------------------|-------------------------------------------------------------------------------------------------------------------------------------------------------------------------------------------------------------------------------------------------------------------|-------------------------------------------------------------------------------------------------------------------------------------------------|------------------------------------------------------|-------------------------------------------------------------------------------------|--------------|--------------------------------|
|                                 |                                                                                                                                                                                                                                                                                      | further details regarding study selection.                                                                                                                                                      |                     |                                                                                                                                                                                                                                                                   |                                                                                                                                                 |                                                      |                                                                                     |              |                                |
| Chamorro-Pareja 2020 (abstract) | To examine the correlation between diabetes and mortality from COVID-19                                                                                                                                                                                                              | Observational studies on diabetic adult populations hospitalized for COVID-19 and that assessed possible correlation between diabetes and mortality.                                            | 5 (2020)            | Medline, Embase, Google Scholar, and medRxiv                                                                                                                                                                                                                      | Association between diabetes in COVID patients and mortality. Diabetes vs non-diabetes.                                                         | 14 studies                                           | 18,506 patients: 3,713 diabetics (DM group) and 14,793 non-diabetics (no-DM group). | Hospital     | USA and others (not specified) |
| Chen 2020                       | This meta-analysis aimed to summarize available data on the association between glycaemic parameters and severity of COVID-19                                                                                                                                                        | Observational studies investigating blood glucose or glycated haemoglobin A1c (HbA1c) according to the severity of COVID-19 were considered for inclusion.                                      | 5 (2020)            | PubMed, Embase and the Cochrane Library                                                                                                                                                                                                                           | Severe COVID (defined as those who required mechanical ventilation, intensive care unit admission or those who died) by blood glucose and HbA1C | 3 studies, 1 with 100% diabetes, 2 mixed populations | 222 COVID patients (131 severe, 91 mild)                                            | Not reported | China                          |
| Chen 2022 (1)                   | We aimed to systematically review the comorbidities and complications of COVID-19 that are associated with various disease severity, progression, and mortality in China, to provide contemporary and reliable estimates in settings with centralized isolation and hospitalization. | To identify all the related comorbidities and complications of COVID-19, in the China region with centralized isolation and hospitalization, with disease severity, progression, and mortality. | 1 (2022)            | PubMed, Embase, Cochrane Library, and the Web of Science, and China National Knowledge Infrastructure, Wanfang Data Knowledge Service Platform, VIP information resource integration service platform databases, and Chinese biomedical literature service system | prevalence, ICU admission, progressive disease, comorbidities and complications (including mortality)                                           | 187 studies overall                                  | 77013 participants                                                                  | Hospital     | China                          |

| Study ID         | Review objective as stated by authors                                                                                                                         | Inclusion criteria as stated by authors                                                                                                                                                                                                                                                                                          | Search month (year) | Databases searched                                                                                                                           | Outcomes reported                                                                                                                                                                                                                                             | # included studies                                                         | # part-icipants                                            | Setting(s)          | Country(s)                                                                                                                                                                              |
|------------------|---------------------------------------------------------------------------------------------------------------------------------------------------------------|----------------------------------------------------------------------------------------------------------------------------------------------------------------------------------------------------------------------------------------------------------------------------------------------------------------------------------|---------------------|----------------------------------------------------------------------------------------------------------------------------------------------|---------------------------------------------------------------------------------------------------------------------------------------------------------------------------------------------------------------------------------------------------------------|----------------------------------------------------------------------------|------------------------------------------------------------|---------------------|-----------------------------------------------------------------------------------------------------------------------------------------------------------------------------------------|
| Chen 2022 (2)    | This study aimed to assess the impact of different antidiabetic agents on individuals with diabetes and COVID-19.                                             | (1) original studies evaluating the clinical outcomes of diabetic COVID-19 patients receiving specific antidiabetic agents at home or in the hospital; (2) study designs including randomized controlled trials (RCT), and observational studies; (3) studies published in English.                                              | 10 (2021)           | PubMed, Web of Science, Embase, and Cochrane Library databases                                                                               | Mortality and severe disease (defined as those requiring intensive care unit admission, mechanical ventilation of acute respiratory distress syndrome, disseminated intravascular coagulation, or others described in the individual study as severe disease) | 42 overall, 35 studies for pairwise MA, 18 studies for Bayesian network MA | Not reported                                               | Not reported        | Italy, USA, Spain, Belgium, Denmark, Austria, China, Turkey, France, UK, Netherlands, S Korea, Brazil, S Africa, Singapore                                                              |
| Cheng 2021       | The present study aimed to estimate the association of chronic comorbidities in severe and non-severe cases of COVID-19                                       | (1) studies describing the epidemiological and clinical features of COVID-19; (2) studies providing data of patients with severe and non-severe cases; and (3) studies written in English or Chinese.                                                                                                                            | 4 (2020)            | PubMed, Embase, China National Knowledge Infrastructure (CNKI), and Wanfang Database, Chinese Scientific Journals Full-text Database (CQVIP) | prevalence                                                                                                                                                                                                                                                    | 22 studies overall, 20 studies examining diabetes                          | 3286 patients overall, 3271 for studies examining diabetes | Hospital            | China                                                                                                                                                                                   |
| Chidambaram 2020 | Sought to better understand the clinical, laboratory and radiological parameters associated with mortality and disease severity among patients with COVID-19. | Observational studies that included patients with microbiologically confirmed SARS-CoV-2 infection, all studies that reported a direct comparison of clinical, laboratory or radiologic characteristics between a) patients who died and those who survived or b) patients with severe disease and those without severe disease. | 5 (2020)            | Pubmed, EMBASE, WHO covid database                                                                                                           | association with mortality, association with severe disease                                                                                                                                                                                                   | 108                                                                        | Risk of mortality: 20296 severity of disease: 17992        | Hospital admissions | Risk of mortality: 32 studies China, six United States, two Spain, one UK, one Italy, one Iran and a multi-country study. Severe disease: seventy-one studies China and one study Italy |

| Study ID       | Review objective as stated by authors                                                                                                                                      | Inclusion criteria as stated by authors                                                                                                                                                                                                                                                                                                                                                                                                                   | Search month (year) | Databases searched                                             | Outcomes reported                                                            | # included studies     | # part-icipants         | Setting(s)   | Country(s)                                                                     |
|----------------|----------------------------------------------------------------------------------------------------------------------------------------------------------------------------|-----------------------------------------------------------------------------------------------------------------------------------------------------------------------------------------------------------------------------------------------------------------------------------------------------------------------------------------------------------------------------------------------------------------------------------------------------------|---------------------|----------------------------------------------------------------|------------------------------------------------------------------------------|------------------------|-------------------------|--------------|--------------------------------------------------------------------------------|
| Choi 2022      | We performed a systematic review and meta-analysis to identify children at high risk of severe COVID-19, with a focus on comorbidities and age.                            | 1) the rates of intensive care unit (ICU) admission, invasive mechanical ventilation, and/or death among children with COVID-19; 2) the inclusion of different age groups, particularly neonates and infants younger than 3 months of age; and 3) the prevalence of comorbidities including prematurity, obesity, diabetes, genetic disorders, neurologic disease, cardiac disease, lung disease, hemato-oncologic disease, and immunocompromised status. | 8 (2021)            | PubMed, EMBASE, Scopus and KoreaMed databases                  | severe disease                                                               | 17 studies (10 in MA)  | not reported            | Not reported | USA 9 studies, 1 each from multinational, Europe, UK, Italy, Turkey, UAE, Iran |
| Chowdhury 2020 | This narrative review attempts to address key questions regarding COVID-19 and T1D.                                                                                        | Not explicitly stated                                                                                                                                                                                                                                                                                                                                                                                                                                     | 5 (2020)            | Pubmed                                                         | Risk of infection discussed, mortality, mortality by HbA1C and obesity       | 2 (with relevant data) | Not reported            | Not reported | UK                                                                             |
| Chua 2021      | This systematic and meta-review aimed to compare clinical presentation, outcomes, and care management among patients with COVID-19 during the early phase of the pandemic. | observational cohort studies or case series with clinical data on patients consecutively admitted for laboratory-confirmed COVID-19. Studies focusing on specific groups of patients (with comorbidities, pregnant women) or only CT outcomes or scores were excluded.                                                                                                                                                                                    | 4 (2020)            | PubMed, Google Scholar, and Chinese Medical Journal databases. | Prevalence of diabetes in non-severe, severe disease and death from COVID-19 | 40 studies in MA       | 4994 participants in MA | hospital     | 30/40 studies from China                                                       |

| Study ID        | Review objective as stated by authors                                                                                                                                                                                                | Inclusion criteria as stated by authors                                                                                                                                                                                           | Search month (year) | Databases searched        | Outcomes reported                                                 | # included studies                                | # part-icipants | Setting(s)                                                                      | Country(s)                                                                                    |
|-----------------|--------------------------------------------------------------------------------------------------------------------------------------------------------------------------------------------------------------------------------------|-----------------------------------------------------------------------------------------------------------------------------------------------------------------------------------------------------------------------------------|---------------------|---------------------------|-------------------------------------------------------------------|---------------------------------------------------|-----------------|---------------------------------------------------------------------------------|-----------------------------------------------------------------------------------------------|
| Corona 2021     | The aim of the present work is to provide an overview and a meta-analysis of main predictors and of country differences of SARS-CoV-2) infection-associated mortality rate in hospitalized patients.                                 | All prospective and retrospective observational studies reporting crude overall COVID-19-related MR in hospitalized subjects, without any arbitrary restriction, were included, even if mortality was not the principal endpoint. | 7 (2020)            | Medline, Embase, Cochrane | Mortality rate                                                    | 87 studies                                        | 35486 patients  | hospital                                                                        | 48 from Asia, 21 from Europe, 13 from USA, 4 from other countries                             |
| Costa 2020      | Providing overview of metabolic changes associated with metabolic syndrome and its relationship with development and worsening of SARS-CoV-2 infection, as well as to review the proposed drugs for the treatment of these patients. | Not stated (just state search terms of obesity, diabetes, liver, NAFLD, hypertension, cardiovascular disease, chloroquine, hydroxychloroquine, antiretroviral drugs, and treatment of coronavirus                                 | 6 (2020)            | Pubmed, Google Scholar    | Prevalence, severity and mortality discussed narratively in text. | Not stated; approximately 5 narratively discussed | Not reported    | Not reported                                                                    | not stated; 1 narratively mentioned Wuhan, China                                              |
| Damayanthi 2021 | This study aimed to systematically review the numerous factors associated with mortality among COVID-19 infected older people.                                                                                                       | All clinical studies evaluating factors associated with mortality of older people aged 60 years or over and diagnosed with COVID-19 were included                                                                                 | 4 (2021)            | PubMed and Science Direct | Mortality                                                         | 20 studies (10 in MA)                             | Not reported    | 13/20 studies in hospitals, 3 in long term care facilities, 4 in other settings | 5 from China, 5 from Italy, 2 each from the UK, Spain and Belgium, 1 each from Sweden, Korea, |

| Study ID                | Review objective as stated by authors                                                                                                                                                                                                                        | Inclusion criteria as stated by authors                                                                                                                                                                                                                                                                              | Search month (year) | Databases searched                  | Outcomes reported                                    | # included studies                                                                                                                                           | # participants                                          | Setting(s)                                  | Country(s)                                                                                                                 |
|-------------------------|--------------------------------------------------------------------------------------------------------------------------------------------------------------------------------------------------------------------------------------------------------------|----------------------------------------------------------------------------------------------------------------------------------------------------------------------------------------------------------------------------------------------------------------------------------------------------------------------|---------------------|-------------------------------------|------------------------------------------------------|--------------------------------------------------------------------------------------------------------------------------------------------------------------|---------------------------------------------------------|---------------------------------------------|----------------------------------------------------------------------------------------------------------------------------|
|                         |                                                                                                                                                                                                                                                              |                                                                                                                                                                                                                                                                                                                      |                     |                                     |                                                      |                                                                                                                                                              |                                                         |                                             | Switzerland, Brazil                                                                                                        |
| d'Annunzio 2020         | The aim of our study was to analyse available data about COVID-19 infections and type 1 diabetes mellitus, and to formulate recommendations for children and adolescents with or who may develop type 1 diabetes mellitus in the time of Covid-19 infection. | Not reported                                                                                                                                                                                                                                                                                                         | 5 (2020)            | Medline and Embase                  | Risk of infection and severity of outcomes discussed | No studies cited which relate to the review question. One relevant statement not cited. Focus on children and adolescents but papers cited from adults also. | Not reported                                            | Not reported                                | Not reported                                                                                                               |
| de Almeida-Pititto 2020 | The aim of this study is to evaluate the association of diabetes, hypertension, cardiovascular disease and ACEI/ARBs exposure with severity (intensive care unit treatment or mechanical ventilation necessity or O2 saturation < 90%), or mortality         | Observational studies that met the following criteria were included: (1) study design (cross-sectional, self-controlled case series or retrospective cohort studies); (2) presence of the following comorbidities (diabetes mellitus, hypertension or cardiovascular disease); (3) use of ACE inhibitors and/or ARB. | 5 (2020)            | PubMed, Cochrane Library and SciELO | Severity, mortality                                  | 18 for severity outcome<br>10 for mortality outcome                                                                                                          | 4305 for severity outcome<br>4247 for mortality outcome | Hospital (only included in-hospital deaths) | 35/40 studies (40 is total for HTN, CVD as well as DM) were from China and 5 were from France, Italy, Greece, and the USA. |



| Study ID      | Review objective as stated by authors                                                                                                                                                                                                                                                                                                     | Inclusion criteria as stated by authors                                                                                                                                | Search month (year) | Databases searched                                                                        | Outcomes reported                      | # included studies | # participants                                | Setting(s)   | Country(s)                                          |
|---------------|-------------------------------------------------------------------------------------------------------------------------------------------------------------------------------------------------------------------------------------------------------------------------------------------------------------------------------------------|------------------------------------------------------------------------------------------------------------------------------------------------------------------------|---------------------|-------------------------------------------------------------------------------------------|----------------------------------------|--------------------|-----------------------------------------------|--------------|-----------------------------------------------------|
|               | from COVID-19 infection.                                                                                                                                                                                                                                                                                                                  |                                                                                                                                                                        |                     |                                                                                           |                                        |                    |                                               |              |                                                     |
| Del Sole 2020 | As clinical and laboratory characteristics associated with severe SARS-CoV-2 infection are not completely clarified, we performed a systematic review and meta-analysis of the data so far reported in SARS-CoV-2-infected patients to identify clinical and laboratory variables associated with a high-risk ARDS, ICU or poor survival. | Clinical studies in patients with SARS-CoV-2 infection that reported comorbidities and laboratory analysis of patients distinguished in severe vs non-severe infection | 5 (2020)            | PubMed, ISI Web of Science, SCOPUS and Cochrane database.                                 | Severity (ARDS, ICU admission, deaths) | 12                 | 2794 patients of which 596 had severe disease | Not reported | 11/12 studies from China, 1/12 from the Netherlands |
| Deravi 2020   | Therefore, this review aimed to elucidate the role and underlying mechanisms of chronic conditions, including DM and hypertension, in clinical manifestations and disease severity of COVID-                                                                                                                                              | We included all observational studies conducted on diabetic and/or hypertensive adult patients with confirmed COVID-19, SARS, and MERS                                 | 3 (2020)            | Pubmed, Google Scholar, Excerpta Media Database (EMBASE), Web of Science and ResearchGate | Not reported                           | Not reported       | Not reported                                  | Not reported | Not reported                                        |

| Study ID      | Review objective as stated by authors                                                                                                                       | Inclusion criteria as stated by authors                                                                                                                                                                                         | Search month (year) | Databases searched                                                                                                                                                | Outcomes reported                                                                                                 | # included studies | # part-icipants | Setting(s)   | Country(s)                                                                                                                |
|---------------|-------------------------------------------------------------------------------------------------------------------------------------------------------------|---------------------------------------------------------------------------------------------------------------------------------------------------------------------------------------------------------------------------------|---------------------|-------------------------------------------------------------------------------------------------------------------------------------------------------------------|-------------------------------------------------------------------------------------------------------------------|--------------------|-----------------|--------------|---------------------------------------------------------------------------------------------------------------------------|
|               | 19, MERS and SARS.                                                                                                                                          |                                                                                                                                                                                                                                 |                     |                                                                                                                                                                   |                                                                                                                   |                    |                 |              |                                                                                                                           |
| Desai 2020    | The objective of this study was to evaluate the pooled estimate of diabetes prevalence in young (<50 years) versus elderly (>50 years) COVID-19 cohorts.    | Literature search until March 2020, all eligible studies reporting frequency of diabetes mellitus were included                                                                                                                 | 3 (2020)            | PubMed, Scopus and Web of Science                                                                                                                                 | The overall prevalence of diabetes in studies including COVID-19 patients, in patients with a mean age >50 vs <50 | 11                 | 2084            | Not reported | Not reported                                                                                                              |
| Deshmukh 2020 | To summarize the updated epidemiology, causes, clinical manifestation and diagnosis, as well as prevention and control of the novel coronavirus SARS-CoV-2. | Not reported                                                                                                                                                                                                                    | Not reported        | PubMed, Medline, Web of Science, Google Scholar and World Health Organization-WHO                                                                                 | Mortality                                                                                                         | Not reported       | Not reported    | Not reported | Not reported                                                                                                              |
| Dessie 2021   | to summarize available findings on the association between comorbidities, complications, smoking status, obesity, gender, age and D-dimer, and risk of      | Studies reporting odds ratios (ORs) or hazard ratios (HRs) along with 95% CI for the association between demographic or epidemiological or clinical characteristics and fatal outcome of coronavirus. No language restrictions. | 8 (2020)            | Google Scholar, Cochrane Library, Web of Sciences, EMBASE, Medline/PubMed, COVID-19 Research Database (WHO), COVID-19 Open Research Dataset Challenge, and Scopus | Mortality                                                                                                         | 42 studies         | 423117 patients | hospital     | 13 were performed in China, 11 in USA, 2 in Spain, 2 in Mexico, 2 in Korea, 3 in Italy, 1 in France, 1 in Australia, 1 in |

| Study ID   | Review objective as stated by authors                                                                                                                                                       | Inclusion criteria as stated by authors                                                                                                                                                          | Search month (year) | Databases searched                                         | Outcomes reported                          | # included studies | # participants                                                 | Setting(s)   | Country(s)                                                  |
|------------|---------------------------------------------------------------------------------------------------------------------------------------------------------------------------------------------|--------------------------------------------------------------------------------------------------------------------------------------------------------------------------------------------------|---------------------|------------------------------------------------------------|--------------------------------------------|--------------------|----------------------------------------------------------------|--------------|-------------------------------------------------------------|
|            | mortality from COVID-19 using a large dataset from a number of studies.                                                                                                                     |                                                                                                                                                                                                  |                     |                                                            |                                            |                    |                                                                |              | Asia, 1 in Brazil, 1 in UK, 2 in Turkey and 2 mixed region. |
| Dhar 2021  | Not reported                                                                                                                                                                                | Not reported                                                                                                                                                                                     | NR                  | Not reported                                               | Severe disease                             | 12 studies         | 3127 patients                                                  | not reported | China, France, Italy and USA                                |
| Du 2020    | To systematically evaluate the prevalence of diabetes among COVID-19 patients in China and its impact on clinical outcomes, including ICU admission, progression to severe cases, or death. | The inclusion criteria for articles in the meta-analysis included: (1) Cross-sectional studies or cohort studies; and (2) Studies that reported the prevalence of diabetes in COVID-19 patients. | 3 (2020)            | PubMed, Web of Science, Embase                             | Prevalence, severity, ICU admission, death | 23                 | 49564 COVID-19 patients (1573 with and 47991 without diabetes) | Not reported | China                                                       |
| Du 2021    | to screen the risk factors for severe illness and death and provide help for early clinical treatment of the new coronavirus (COVID-19).                                                    | studies that explored the cause and risk factors for severe illness and death in COVID-19 patients.                                                                                              | 10 (2020)           | PubMed, Embase, and Web of Science                         | Severe diseases and mortality              | 17 studies         | not reported                                                   | not reported | 16 from China, 1 from Italy                                 |
| Emami 2020 | The current meta-analysis aimed to estimate the prevalence of underlying disorders in hospitalized COVID-19 patients.                                                                       | Any relevant articles that reported clinical characteristics and epidemiological information on infected patients were included in the analysis.                                                 | 2 (2020)            | PubMed, Scopus, Web of Science, Google scholar, and Embase | Prevalence                                 | 10                 | 3403                                                           | Hospital     | China                                                       |

| Study ID          | Review objective as stated by authors                                                                                                                                                                     | Inclusion criteria as stated by authors                                                                                                                                                                                                                                       | Search month (year) | Databases searched                                                                                                                                                                                | Outcomes reported                                               | # included studies                           | # part-icipants                           | Setting(s)      | Country(s)                                                      |
|-------------------|-----------------------------------------------------------------------------------------------------------------------------------------------------------------------------------------------------------|-------------------------------------------------------------------------------------------------------------------------------------------------------------------------------------------------------------------------------------------------------------------------------|---------------------|---------------------------------------------------------------------------------------------------------------------------------------------------------------------------------------------------|-----------------------------------------------------------------|----------------------------------------------|-------------------------------------------|-----------------|-----------------------------------------------------------------|
| Espinosa 2020     | The aim of this meta-analysis was to calculate the prevalence and geographical distribution of comorbidities in all patients admitted to intensive care units (ICUs), and the mortality rate of COVID-19. | This review considered studies that conducted epidemiological and clinical descriptions in patients and in fatal cases from different parts of the world, in order to determine the prevalence and geographic distribution of comorbidities in patients affected by COVID-19. | 5 (2020)            | Latin American and Caribbean Health Sciences Literature (LILACS), the bibliographic database of the US National of Medicine (Medline), the Elsevier database (EMBASE), Web of Science and SCOPUS. | ICU admission, mortality and prevalence                         | 42, 39 of which were analysed for prevalence | 89,238                                    | Not reported    | 2 Korea, 2 USA, 1 India, 1 Italy, 1 Singapore , the rest China  |
| Fadini 2020       | We show results of a meta-analysis of studies reporting the prevalence of diabetes among people infected with the SARS-CoV-2 and its impact on disease severity or progression.                           | Not reported                                                                                                                                                                                                                                                                  | 3 (2020)            | Not reported                                                                                                                                                                                      | Prevalence, severity (severe, progressed, ICU admission, death) | 12                                           | 2108                                      | Hospital (8/12) | China                                                           |
| Faghir-Gangi 2020 | The present study estimated the pooled prevalence of diabetes in patients with COVID-19.                                                                                                                  | All cross-sectional studies reporting prevalence of diabetes in patients with COVID-19 were eligible for the study. There was no limitation in the time and language of the published papers.                                                                                 | 4 (2020)            | Web of Science, Scopus and PubMed                                                                                                                                                                 | Prevalence                                                      | 20                                           | 5515 COVID-19 patients, 578 with diabetes | Not reported    | 12/20 from Wuhan, 6/20 rest of China, 2 elsewhere (France, USA) |
| Fang 2020         | A systematic review and meta-analysis were conducted,                                                                                                                                                     | Studies were eligible for inclusion in this meta-analysis if they met the following criteria: (data                                                                                                                                                                           | 4 (2020)            | PubMed, medRxiv and bioRxiv                                                                                                                                                                       | Severity of COVID-19<br>Death<br>ICU Admission<br>ARDS          | 69 in qualitative analysis<br>61 in          | Not stated                                | Hospital        | China (with 1 study in Singapore)                               |

| Study ID      | Review objective as stated by authors                                                                                                                                                                                     | Inclusion criteria as stated by authors                                                                                                                                                                                                                                                                                                                                                                                                                                                  | Search month (year) | Databases searched                         | Outcomes reported                        | # included studies    | # participants       | Setting(s)   | Country(s)                                                                                                                                                                                               |
|---------------|---------------------------------------------------------------------------------------------------------------------------------------------------------------------------------------------------------------------------|------------------------------------------------------------------------------------------------------------------------------------------------------------------------------------------------------------------------------------------------------------------------------------------------------------------------------------------------------------------------------------------------------------------------------------------------------------------------------------------|---------------------|--------------------------------------------|------------------------------------------|-----------------------|----------------------|--------------|----------------------------------------------------------------------------------------------------------------------------------------------------------------------------------------------------------|
|               | seeking to collect and comprehensively evaluate the associations of epidemiological, co-morbidity factors with the severity and prognosis of COVID-19                                                                     | published in a peer reviewed journal in English or Chinese); (2) the study is a case-control, cohort or cross-sectional design in human beings; (3) the studies provide sufficient information for epidemiological, comorbidity factors with severity or prognosis of COVID-19                                                                                                                                                                                                           |                     |                                            | Invasive Ventilation Disease Progression | quantitative analysis |                      |              |                                                                                                                                                                                                          |
| Fathi 2021    | to provide additional data regarding the clinical characteristics of the patients diagnosed with COVID-19, and in particular to analyze the factors associated with disease severity, lack of improvement, and mortality. | All studies evaluating the clinical risk factors, underlying diseases, and comorbidities of COVID-19 have been reviewed. For our final analysis, the studies selected should report data on the prevalence of each of the risk factors for the severity of COVID-19 and its comorbidities in patients with COVID-19 infection, including hypertension, chronic kidney disease, diabetes, cardiovascular and cerebrovascular diseases, and coronary heart disease. English language only. | 9 (2020)            | PubMed, Scopus, Web of Science, and Embase | Prevalence                               | 102 studies           | 121,437 participants | not reported | Most of the studies were conducted in China, while 11 were conducted in the United States, 6 in Italy, 4 in the UK, 2 in Korea, 1 in Spain, 1 in Belgium, 1 in Greece, 1 in Bolivia, and 1 in Singapore. |
| Figliozi 2020 | We reviewed available evidence and provided pooled estimates on predictors of                                                                                                                                             | We included published peer-reviewed, pre-proof articles and papers published ahead of print which reported Covid-19                                                                                                                                                                                                                                                                                                                                                                      | 4 (2020)            | PubMed/Medline and Scopus                  | Severity (composite), mortality          | 49                    | 20211                | Not reported | Multiple                                                                                                                                                                                                 |

| Study ID      | Review objective as stated by authors                                                                                                                                                                                                                               | Inclusion criteria as stated by authors                                                                                                                                                                                                                                                                                                | Search month (year) | Databases searched                                | Outcomes reported                                                       | # included studies                                                         | # part-icipants | Setting(s)   | Country(s)                                                    |
|---------------|---------------------------------------------------------------------------------------------------------------------------------------------------------------------------------------------------------------------------------------------------------------------|----------------------------------------------------------------------------------------------------------------------------------------------------------------------------------------------------------------------------------------------------------------------------------------------------------------------------------------|---------------------|---------------------------------------------------|-------------------------------------------------------------------------|----------------------------------------------------------------------------|-----------------|--------------|---------------------------------------------------------------|
|               | clinical outcomes in patients with COVID-19                                                                                                                                                                                                                         | cases along with pre infection comorbidities and demographical, laboratory, and clinical information.                                                                                                                                                                                                                                  |                     |                                                   |                                                                         |                                                                            |                 |              |                                                               |
| Flaherty 2020 | This narrative review article will focus on the issues facing adults with predisposing medical conditions, especially cardiorespiratory and metabolic, in an effort to provide greater clarity to the travelling public and guidance to their healthcare providers. | The final reference list was agreed by all authors on the basis of its relevance to the topics covered in this review, with the aim of exploring the clinical presentation and complications of COVID-19 in patients with co-morbid conditions.                                                                                        | 6 (2020)            | PubMed                                            | Severity, death, and by obesity and glycaemia                           | 130 relevant publications (looking at a number of different comorbidities) | Not reported    | Not reported | Not reported                                                  |
| Gaba 2022     | We carried out a meta-analytic synthesis to evaluate the association between diabetes mellitus and related clinical outcomes, co-morbidities, their risk factors and resource utilization in patients with COVID-19.                                                | (i) studied subjects were diabetic and non-diabetic exposed to COVID-19; (ii) outcome of interest reported comorbidities and clinical manifestations of COVID-19; and (iii) studies reporting observational study design (retrospective cohort, case-control, prospective cohort, and cross-sectional studies). English language only. | 1 (2021)            | MEDLINE or PubMed, Web of Science, Google Scholar | ICU and mechanical ventilation, mortality and subgroups for comorbidity | 14 studies                                                                 | 5697 patients   | not reported | 12 were conducted in China, one in the USA, and one in the UK |

| Study ID         | Review objective as stated by authors                                                                                                                                                                                       | Inclusion criteria as stated by authors                                                                                                                                                                                                                                                                                                                                                                                                                                                                                                                                                                                                                 | Search month (year) | Databases searched                                                              | Outcomes reported          | # included studies | # part-icipants        | Setting(s)   | Country(s)                                                                                       |
|------------------|-----------------------------------------------------------------------------------------------------------------------------------------------------------------------------------------------------------------------------|---------------------------------------------------------------------------------------------------------------------------------------------------------------------------------------------------------------------------------------------------------------------------------------------------------------------------------------------------------------------------------------------------------------------------------------------------------------------------------------------------------------------------------------------------------------------------------------------------------------------------------------------------------|---------------------|---------------------------------------------------------------------------------|----------------------------|--------------------|------------------------|--------------|--------------------------------------------------------------------------------------------------|
| Gallo Marin 2020 | Not reported                                                                                                                                                                                                                | Not reported                                                                                                                                                                                                                                                                                                                                                                                                                                                                                                                                                                                                                                            | Not reported        | Not reported                                                                    | Not reported               | Not reported       | Not reported           | Not reported | Not reported                                                                                     |
| Ganesh 2022      | to perform a systematic review and meta-analysis to investigate whether the use of metformin in COVID-19 patients with new or pre-existing diabetes mellitus affects outcomes such as mortality and severity of the disease | Studies reporting data on metformin use in COVID-19 patients with DM.<br>i. The studies should be published in English language in all databases.<br>ii. All participants should be adult patients (>18 y) diagnosed with COVID-19 and diabetes mellitus.<br>iii. randomised controlled trials (RCTs) or observational studies that looked at patients taking metformin vs. patients not taking metformin which reported at least 1 outcome (mortality or composite endpoint) and an OR, risk ratio or hazards ratio in either adjusted and/or nonadjusted forms. iv. The studies should have at least 70 patients with COVID-19 and diabetes mellitus. | 4 (2021)            | PubMed, Scopus, Web of Science, EMBASE, Clinicaltrials.gov and Cochrane library | Mortality by metformin use | 32 studies         | 2,916,231 participants | not reported | 11 were from China; 6, USA; 6, UK; 4, South Korea; 2, France; 1, Spain; 1, Italy; and 1, Belgium |
| Giri 2021        | The aim of this analysis was to assess the prevalence of clinical features, comorbidities, complications and treatment options in the patients with COVID-19                                                                | All studies comparing clinical data of severe and non-severe patients of COVID-19 were included. The inclusion criteria were as follows: (a) study population: studies with patients diagnosed with COVID-19; (b) comparative studies:                                                                                                                                                                                                                                                                                                                                                                                                                  | 7 (2020)            | PubMed, Embase, Scopus and Web of Sciences                                      | prevalence, severity       | 12 studies         | 3046 participants      | Not reported | China                                                                                            |

| Study ID  | Review objective as stated by authors                                                                                                                                                                            | Inclusion criteria as stated by authors                                                                                                                                                                                                                                                    | Search month (year) | Databases searched                                 | Outcomes reported    | # included studies | # part-icipants     | Setting(s)   | Country(s)                                                                |
|-----------|------------------------------------------------------------------------------------------------------------------------------------------------------------------------------------------------------------------|--------------------------------------------------------------------------------------------------------------------------------------------------------------------------------------------------------------------------------------------------------------------------------------------|---------------------|----------------------------------------------------|----------------------|--------------------|---------------------|--------------|---------------------------------------------------------------------------|
|           | and compare incidence of these clinical data in severe and non-severe patients.                                                                                                                                  | studies that compare severe and non-severe cases of COVID-19; and(c) the studies reporting parameters of clinical features, comorbidities, complications and treatment. English language only and adult or mixed populations, paediatric only studies excluded.                            |                     |                                                    |                      |                    |                     |              |                                                                           |
| Giri 2021 | to compare the clinical characteristics, comorbidities, complications, and treatment modalities among severe and non-severe COVID-19 patients, in order to obtain clear picture of risk factors of severe cases. | (a) Studies with patients diagnosed with COVID-19, (b) Studies involving the severe cases or ICU cases and non-severe or non-ICU cases, (c) at least one outcomes reported among clinical features, comorbidities, complications, and treatment options in severe and non-severe patients. | 11 (2020)           | PubMed, Scopus, Embase, and Web of Sciences        | prevalence, severity | 41 studies         | 16,495 participants | Not reported | Most studies were from China (n = 26), followed by United States (n = 5), |
| Goel 2021 | In our review, clinical characteristics and laboratory parameters of COVID-19 patients were compiled systematically, with special reference to pregnant women in order to                                        | identified target population; included cases with diagnosed COVID-19; and provided detailed accounts of clinical features and related laboratory parameters.                                                                                                                               | 5 (2020)            | PubMed, Google Scholar, Embase, and Web of Science | prevalence           | 7 studies          | 3231 participants   | Not reported | China                                                                     |



| Study ID   | Review objective as stated by authors                                                                                                                                                                                                       | Inclusion criteria as stated by authors                                                                                                                                                                                                                           | Search month (year) | Databases searched                                                                                                                                                                              | Outcomes reported                                                           | # included studies | # participants                                   | Setting(s)   | Country(s)                                                                                             |
|------------|---------------------------------------------------------------------------------------------------------------------------------------------------------------------------------------------------------------------------------------------|-------------------------------------------------------------------------------------------------------------------------------------------------------------------------------------------------------------------------------------------------------------------|---------------------|-------------------------------------------------------------------------------------------------------------------------------------------------------------------------------------------------|-----------------------------------------------------------------------------|--------------------|--------------------------------------------------|--------------|--------------------------------------------------------------------------------------------------------|
|            | understand the disease course.                                                                                                                                                                                                              |                                                                                                                                                                                                                                                                   |                     |                                                                                                                                                                                                 |                                                                             |                    |                                                  |              |                                                                                                        |
| Gold 2020  | In this systematic review, we aimed to assess the epidemiological characteristics of comorbidities in patients infected with SARS-CoV-2. Furthermore, we aimed to evaluate comorbidities associated with severe COVID-19 disease/mortality. | (1) Studies with patients of all ages with confirmed severe acute respiratory syndrome coronavirus 2 (SARS-CoV-2) infection. (2) Prospective and retrospective case series, retrospective cohort studies, and epidemiological governmental situation reports.     | 4 (2020)            | PubMed and EmBase                                                                                                                                                                               | Prevalence, severity and mortality.                                         | 33                 | 29,096                                           | Not reported | China, 1<br>Europe, 1<br>Singapore, 3<br>USA, 2<br>Korea, 1<br>India, 1<br>Australia, 1<br>Netherlands |
| Guler 2020 | In this review, we have aimed to focus on the most common co-morbidities in patients with COVID-19 and their possible roles in disease progression                                                                                          | We included case reports, retrospective studies, systematic reviews, meta-analyses, clinical guidelines and recommendations                                                                                                                                       | 5 (2020)            | Pubmed and Google Scholar                                                                                                                                                                       | Labratory Measures<br>Prevalence<br>Case-fatality                           | Not stated         | Not stated                                       | Not stated   | Not stated                                                                                             |
| Guo 2020   | Diabetes mellitus has been reported to be one of the most prevalent comorbidity inpatients with Coronavirus Disease 2019 (COVID-19). We aimed to assess the association of                                                                  | All research articles in adult patients diagnosed with COVID-19; with direct or indirect information on the outcome of disease severity or mortality grouped by comorbid diabetes; conducted in Mainland China and published between January 01 and May 30, 2020. | 5 (2020)            | PubMed, Web of Knowledge, medRxiv, and bioRxiv for English-language literatures, the China National Knowledge infrastructure (CNKI) and the Wanfang database for Chinese-language publications. | Disease severity or death (8/9 studies report severity, 1/9 reports deaths) | 9                  | 8807 COVID patients, 1070 patients with diabetes | Not reported | China                                                                                                  |

| Study ID   | Review objective as stated by authors                                                                                                            | Inclusion criteria as stated by authors                                                                                                                                                                                                                                                                                                                                                                                                                                                                                            | Search month (year) | Databases searched                                                                                                                                                                                                                                                                                                                                                                  | Outcomes reported                                                  | # included studies | # participants      | Setting(s)                           | Country(s)                                   |
|------------|--------------------------------------------------------------------------------------------------------------------------------------------------|------------------------------------------------------------------------------------------------------------------------------------------------------------------------------------------------------------------------------------------------------------------------------------------------------------------------------------------------------------------------------------------------------------------------------------------------------------------------------------------------------------------------------------|---------------------|-------------------------------------------------------------------------------------------------------------------------------------------------------------------------------------------------------------------------------------------------------------------------------------------------------------------------------------------------------------------------------------|--------------------------------------------------------------------|--------------------|---------------------|--------------------------------------|----------------------------------------------|
|            | comorbid diabetes with COVID-19 severity or mortality in China.                                                                                  |                                                                                                                                                                                                                                                                                                                                                                                                                                                                                                                                    |                     |                                                                                                                                                                                                                                                                                                                                                                                     |                                                                    |                    |                     |                                      |                                              |
| Gupta 2021 | The present systematic review and meta-analysis aimed to determine the overall mortality and diabetes-associated mortality in COVID-19 patients. | We included case-control/cohort studies conducted on COVID-19 patients, as well as the studies representing the data of COVID-19 mortality and diabetes-associated mortality.                                                                                                                                                                                                                                                                                                                                                      | 12 (2020)           | Pubmed, Embase, MEDLINE, Web of Science, Google Scholar, and DOAJ databases.                                                                                                                                                                                                                                                                                                        | prevalence and mortality                                           | 35 studies         | 25,934 participants | Not reported                         | 23 studies from China, 12 from outside China |
| Han 2022   | This study was performed to clarify anti-inflammatory effects of anti-diabetic agents on COVID-19 in patients with diabetes.                     | a) Observational study including cohort and retrospective cohort study; b) Patients were older than 18 years of age and diagnosed with both diabetes and COVID-19; c) Home use or in-hospital use of specific anti-diabetic agents vs. drugs or therapy except specific anti-diabetic agents; d) Clinically validated definition of death, poor composite outcomes including intubation ventilation, Acute Respiratory Distress Syndrome (ARDS), Disseminated intravascular coagulation(DIC), intensive care unit (ICU) admission, | 4 (2021)            | China National Knowledge Infrastructure (CNKI), Wanfang Data Knowledge Service Platform, Chinese periodical service platform VIP Database, China Biology Medicine (CBM, Sinomed), MedRxiv, PubMed, ScienceDirect, Web of Science, Ovid Databases (LWW), Springer Link, Wiley Online Library, Oxford Academic, Nature Press Group, Cochrane Library, and BMJ Evidence-Based Medicine | Mortality and poor composite outcomes with metformin and DPP4i use | 31 studies         | 66914 patients      | Home and hospital use of medications | Europe, North America, Asia                  |

| Study ID            | Review objective as stated by authors                                                                                      | Inclusion criteria as stated by authors                                                                                                                                                                                                                                                                                                                                                                                        | Search month (year) | Databases searched             | Outcomes reported                                       | # included studies                                                                                                         | # participants               | Setting(s)                                                            | Country(s)        |
|---------------------|----------------------------------------------------------------------------------------------------------------------------|--------------------------------------------------------------------------------------------------------------------------------------------------------------------------------------------------------------------------------------------------------------------------------------------------------------------------------------------------------------------------------------------------------------------------------|---------------------|--------------------------------|---------------------------------------------------------|----------------------------------------------------------------------------------------------------------------------------|------------------------------|-----------------------------------------------------------------------|-------------------|
|                     |                                                                                                                            | disease progression, or other adverse outcomes.                                                                                                                                                                                                                                                                                                                                                                                |                     |                                |                                                         |                                                                                                                            |                              |                                                                       |                   |
| Hariyanto 2020      | This study aims to analyse the potential association between metformin use and the mortality rate from COVID-19 infection. | All articles identified that matched the search criteria were assessed, and those reporting the rate of metformin use in COVID-19 patients with a clinically validated definition of “mortality” were included in this meta-analysis.                                                                                                                                                                                          | 9 (2020)            | Google Scholar                 | Mortality by metformin                                  | 5                                                                                                                          | 6937                         | Not reported                                                          | USA and China     |
| Hariyanto 2021      | This study aims to analyze the potential association between DPP-4 inhibitor and the composite poor outcome of COVID-19.   | representation for clinical questions (P: patients with diabetes who have positive/confirmed cases of COVID-19; I: a group of patients with DPP-4 inhibitor as their medication; C: a group of patients without DPP-4 inhibitor usage; O: severe COVID-19 and mortality, type of study was a randomized control trial, cohort, clinical trial, case-cohort, and cross-over design, and if the full-text article was available. | 11 (2020)           | PubMed and Europe PMC database | Severity and mortality and DPP4i use                    | 10 studies                                                                                                                 | 7012 patients                | Not reported                                                          | Europe and E Asia |
| Hartmann-Boyce 2020 | To consider direct and indirect risks posed to PWD by COVID-19 and management considerations for PWD both with and without | Not reported                                                                                                                                                                                                                                                                                                                                                                                                                   | Not reported        | Not reported                   | Prevalence, disease severity, outcomes by blood glucose | Three SRs and 2 primary studies report on prevalence<br>Four SRs, 6 cohorts report on severity<br>5 primary studies report | Not reported for all studies | Not reported for all studies although majority from hospital settings | Multiple          |

| Study ID        | Review objective as stated by authors                                                                                                                    | Inclusion criteria as stated by authors                                                                                                                                                                                                                                                                                                                                                                                                                                                                                                                                                                                                            | Search month (year) | Databases searched                                                                | Outcomes reported | # included studies      | # part-icipants   | Setting(s)   | Country(s)          |
|-----------------|----------------------------------------------------------------------------------------------------------------------------------------------------------|----------------------------------------------------------------------------------------------------------------------------------------------------------------------------------------------------------------------------------------------------------------------------------------------------------------------------------------------------------------------------------------------------------------------------------------------------------------------------------------------------------------------------------------------------------------------------------------------------------------------------------------------------|---------------------|-----------------------------------------------------------------------------------|-------------------|-------------------------|-------------------|--------------|---------------------|
|                 | COVID-19 infection.                                                                                                                                      |                                                                                                                                                                                                                                                                                                                                                                                                                                                                                                                                                                                                                                                    |                     |                                                                                   |                   | on glucose and outcomes |                   |              |                     |
| Hoang 2021      | This study aimed to compare the contribution of comorbidities in the development of critical conditions in coronavirus disease 2019 (COVID-19) patients. | all published case series, retrospective or prospective observational studies, and clinical trials that compare the prevalence of comorbidities between critical and non-critical patients admitted owing to COVID-19. The pre-specified underlying diseases were chronic obstructive pulmonary disease (COPD), cardiovascular disease (CVD), cerebrovascular accident (CVA), hypertension, diabetes, chronic liver disease, chronic kidney disease, and malignancy. The pre-specified severity outcomes were severe infection, intensive care unit (ICU) admission, acute respiratory distress syndrome (ARDS), cardiac injury, and liver injury. | 4 (2020)            | PubMed, EMBASE, and the Cochrane Library                                          | Severity and ICU  | 18 studies              | 5179 patients     | Not reported | China               |
| Honardoost 2021 | This meta-analysis aimed to assess the association between all underlying comorbidities in COVID-19 infection severity.                                  | We included all relevant articles reporting clinical characteristics and epidemiological information on COVID-19 patients separately in a severe and non-severe group. The criteria for                                                                                                                                                                                                                                                                                                                                                                                                                                                            | NR                  | Not reported - can't find supplement with search strategy which may have details. | Severity          | 28 studies              | 6270 participants | Not reported | Majority from China |

| Study ID | Review objective as stated by authors                                                                                                                                                                                                                                                                | Inclusion criteria as stated by authors                                                                                                                                                                                                                                                                                  | Search month (year) | Databases searched                                        | Outcomes reported                                                                                                                                                                | # included studies                                    | # participants                                   | Setting(s)   | Country(s)          |
|----------|------------------------------------------------------------------------------------------------------------------------------------------------------------------------------------------------------------------------------------------------------------------------------------------------------|--------------------------------------------------------------------------------------------------------------------------------------------------------------------------------------------------------------------------------------------------------------------------------------------------------------------------|---------------------|-----------------------------------------------------------|----------------------------------------------------------------------------------------------------------------------------------------------------------------------------------|-------------------------------------------------------|--------------------------------------------------|--------------|---------------------|
|          |                                                                                                                                                                                                                                                                                                      | severe disease include ICU admission, acute respiratory distress syndrome, need for supplemental oxygen or O <sub>2</sub> saturation <93%, critically ill cases, and severe outcome                                                                                                                                      |                     |                                                           |                                                                                                                                                                                  |                                                       |                                                  |              |                     |
| Hu 2020  | To evaluate the risk factors of COVID-19. Aim was to "describe epidemiological, clinical characteristics, complications, and outcomes of patients confirmed to have 2019-nCoV infection, and to compare the severity between diabetes or hypertension and non-diabetes or non-hypertension patients" | Randomized controlled trial, clinical trials, and series cases; patients who were of either sex and had been diagnosed with COVID-19; all patients with laboratory-identified SARS-CoV-2 infection; clear description of the clinical characteristics such as comorbidities; clear description of the outcomes including | 3 (2020)            | Medline, Sino Med, EMBASE, and Cochrane Library databases | Most prevalent clinical symptoms. Prevalence of comorbidities<br>Risks of severity and mortality rates.<br>Percentage of severe cases in patients with diabetes and hypertension | 21 included in qualitative and quantitative synthesis | 47,344 patients (24,419 male and 22,925 females) | Not reported | Singapore and China |
| Hu 2021  | We aim to investigate the clinical characteristics and risk factors for the severe cases of coronavirus disease 2019 (COVID-19) in                                                                                                                                                                   | The studies on observation of clinical characteristics in severe and non-severe patients with COVID-19 were included.                                                                                                                                                                                                    | 7 (2020)            | PubMed, EMBASE, Web of Science, and CNKI                  | Severity and ICU                                                                                                                                                                 | 30 studies                                            | 6685 patients                                    | Not reported | Not reported        |

| Study ID     | Review objective as stated by authors                                                                                                                                                                             | Inclusion criteria as stated by authors                                                                                                                                                                                       | Search month (year) | Databases searched            | Outcomes reported                                         | # included studies | # part-icipants                                           | Setting(s)   | Country(s)                                 |
|--------------|-------------------------------------------------------------------------------------------------------------------------------------------------------------------------------------------------------------------|-------------------------------------------------------------------------------------------------------------------------------------------------------------------------------------------------------------------------------|---------------------|-------------------------------|-----------------------------------------------------------|--------------------|-----------------------------------------------------------|--------------|--------------------------------------------|
|              | comparison with the non-severe patients.                                                                                                                                                                          |                                                                                                                                                                                                                               |                     |                               |                                                           |                    |                                                           |              |                                            |
| Huang 2020   | We conducted a systematic review and meta-analysis in order to investigate the association between DM and poor outcome in patients with COVID-19 pneumonia.                                                       | adult patients diagnosed with COVID-19 with information on DM and clinical grouping or outcome of the clinically validated definition of mortality, severe COVID-19, ARDS, ICU care, and disease progression.                 | 4 (2020)            | PubMed and EuropePMC, MEDLINE | Mortality, severe COVID, ICU care, composite poor outcome | 30                 | 6452                                                      | Not reported | Not reported                               |
| Hussain 2020 | We aimed to briefly review the general characteristics of the novel coronavirus (SARS-CoV-2) and provide a better understanding of the coronavirus disease (COVID-19) in people with diabetes, and its management | Not reported                                                                                                                                                                                                                  | 4 (2020)            | PubMed and Google Scholar     | Prevalence, severe COVID, mortality                       | Not reported       | Not reported                                              | Not reported | Not reported                               |
| Hussain 2020 | Evidence suggests diabetes to be a risk factor for the progression and poor prognosis of COVID-19. Therefore, we aimed to understand the                                                                          | We selected all those studies that reported the prevalence of diabetes and associated outcomes (mortality, ICU admission) in confirmed COVID-19 patients. We included only published peer-reviewed studies that had presented | 4 (2020)            | PubMed, MEDLINE               | Prevalence, ICU admission, mortality                      | 43                 | 23007 overall. Detail for each included study in Table 1. | Not reported | Detail for each included study in Table 1. |

| Study ID        | Review objective as stated by authors                                                                                                                                               | Inclusion criteria as stated by authors                                                                                                                                                                          | Search month (year) | Databases searched                                                                           | Outcomes reported                                                      | # included studies | # participants  | Setting(s)   | Country(s)                                                                                                             |
|-----------------|-------------------------------------------------------------------------------------------------------------------------------------------------------------------------------------|------------------------------------------------------------------------------------------------------------------------------------------------------------------------------------------------------------------|---------------------|----------------------------------------------------------------------------------------------|------------------------------------------------------------------------|--------------------|-----------------|--------------|------------------------------------------------------------------------------------------------------------------------|
|                 | pooled prevalence of diabetes in patients infected with COVID-19. We also aimed to compute the risk of mortality and ICU admissions in COVID-19 patients with and without diabetes. | their findings on at least ten confirmed COVID-19 patients.                                                                                                                                                      |                     |                                                                                              |                                                                        |                    |                 |              |                                                                                                                        |
| Izcovich 2020   | The objective of our systematic review is to identify prognostic factors that may be used in decision-making related to the care of patients infected with COVID-19                 | We included studies that assessed patients with confirmed or suspected SARS-CoV-2 infectious disease and examined one or more prognostic factors for mortality or disease severity.                              | 4 (2020)            | n PubMed/MEDLINE, the Cochrane Central Register of Controlled Trials (CENTRAL) and Embase.   | Diabetes Mortality in COVID and prevalence of diabetes in severe COVID | 207                | 75607           | Not reported | 12 different countries (China, USA, Canada, Spain, France, Turkey, Korea, Japan, Italy, Germany, India and Singapore). |
| Javanmardi 2020 | The aim of current study is evaluating the prevalence of underlying disease in died people with COVID-19.                                                                           | Included criteria were defined as follow: any articles about death related to COVID-19, studies which reported underlying diseases in died patients.                                                             | 6 (2020)            | International database including PubMed, Scopus, Web of Science, Cochrane and google scholar | Severity of disease and high mortality rate                            | 32                 | 2431            | Not reported | Majority in China                                                                                                      |
| Jindal 2022     | This study aimed to estimate the prevalence of co morbidities among COVID 19 patients in the Indian population and their association with mortality.                                | Studies conducted in India in English language published online that reported detailed epidemiological characteristics, prevalence of co-morbidities and in-hospital mortality were included. Also, studies that | 5 (2021)            | PubMed, Google Scholar, and World Health Organization website                                | prevalence and mortality                                               | 34 studies         | 23,034 patients | Not reported | India                                                                                                                  |

| Study ID      | Review objective as stated by authors                                                                                                                                                     | Inclusion criteria as stated by authors                                                                                                                                                                                                                                                                                                                                                                                     | Search month (year) | Databases searched                                   | Outcomes reported         | # included studies | # participants     | Setting(s)   | Country(s)                                                                                                                 |
|---------------|-------------------------------------------------------------------------------------------------------------------------------------------------------------------------------------------|-----------------------------------------------------------------------------------------------------------------------------------------------------------------------------------------------------------------------------------------------------------------------------------------------------------------------------------------------------------------------------------------------------------------------------|---------------------|------------------------------------------------------|---------------------------|--------------------|--------------------|--------------|----------------------------------------------------------------------------------------------------------------------------|
|               |                                                                                                                                                                                           | reported the prevalence of co-morbidities without mortality were included only for the meta-analysis of prevalence.                                                                                                                                                                                                                                                                                                         |                     |                                                      |                           |                    |                    |              |                                                                                                                            |
| Kaminska 2021 | This systematic review and meta-analysis aim to summarize and synthesize the evidence published about the impact of diabetes mellitus on in-hospital mortality in patients with COVID-19. | The prespecified criteria for studies included in the meta-analysis were original papers of RCTs or cohort studies with minimum 10 patients in each group of (P) participants, adult patients with diabetes mellitus; (E) COVID-19 disease; (C) patients without diabetes mellitus; (O) outcomes, detailed information for survival, complications and length of hospital stay                                              | 12 (2020)           | MEDLINE, EMBASE, Web of Science, Scopus, Cochrane    | severe disease, mortality | 19 studies         | 10,801 patients    | Hospital     | 10 studies were performed in China, two in USA, two in France, two in Korea, one in each of the UK, Qatar and South Korea. |
| Kan 2021      | To assess various antidiabetic agents' association with mortality in patients with T2D who have COVID-19                                                                                  | Inclusion criteria were as follows: study type, published studies regarding associations between antidiabetic agents and patients with T2DM who had COVID-19; exposure intervention, patients with T2DM who had COVID-19 received antidiabetic agents (e.g., metformin, sulfonylurea, glucagon-like peptide 1 [GLP-1] receptor agonists, dipeptidyl peptidase 4 [DPP-4] inhibitors, sodium-glucose cotransporter 2 [SGLT2]) | 2 (2021)            | PubMed, Web of Science, Embase, and Cochrane Library | Mortality by subgroup     | 18 studies         | 17338 participants | Not reported | 7 from China, 2 from USA, 1 from S Korea, 2 from UK, 3 from Italy, 3 from France                                           |



| Study ID     | Review objective as stated by authors                                                                                                                                                                                         | Inclusion criteria as stated by authors                                                                                                                                                                                                                                                                                                                               | Search month (year) | Databases searched                           | Outcomes reported                                                                                                                                                                                                      | # included studies | # participants     | Setting(s)   | Country(s)                                                                                                                    |
|--------------|-------------------------------------------------------------------------------------------------------------------------------------------------------------------------------------------------------------------------------|-----------------------------------------------------------------------------------------------------------------------------------------------------------------------------------------------------------------------------------------------------------------------------------------------------------------------------------------------------------------------|---------------------|----------------------------------------------|------------------------------------------------------------------------------------------------------------------------------------------------------------------------------------------------------------------------|--------------------|--------------------|--------------|-------------------------------------------------------------------------------------------------------------------------------|
|              |                                                                                                                                                                                                                               | inhibitors, a-glucosidase inhibitors, and/or insulin); and outcome indicator, quantitative assessment of associations between antidiabetic agent use and patient mortality, including odds ratios (ORs) and 95% confidence intervals (CIs).                                                                                                                           |                     |                                              |                                                                                                                                                                                                                        |                    |                    |              |                                                                                                                               |
| Kandil 2021  | We, therefore, combined the results of the published studies via a meta-analysis to precisely detect the excess risk of COVID-19 mortality attributed to diabetes.                                                            | The study was considered eligible if 1) it was published in English, 2) the exposure was COVID-19 patients with diabetes in comparison with COVID-19 patients without diabetes, 3) the outcome was COVID-19 mortality, and 4) the number of COVID-19 patients with diabetes is 50 or more.                                                                            | 5 (2020)            | MEDLINE (PubMed), Web of Science, and Scopus | mortality                                                                                                                                                                                                              | 15 studies         | 75,200             | Not reported | 10 studies were from China, 3 from USA and 1 each from Iran and Mexico                                                        |
| Kubjane 2020 | The primary objective is to assess the association between diabetes and severe COVID-19 clinical course in patients hospitalized due to COVID-19. The secondary objective is to assess the prevalence of diabetes in patients | Observational cohort and case-control studies that compare exposure with outcomes between different groups. The study population included children, adolescents, and adults who were hospitalized due to suspected, probable, or confirmed COVID-19. To be eligible for inclusion, studies must have compared outcomes in a group of exposed individuals (people with | 5 (2020)            | Medline and Embase                           | Severe disease (composite measure of any of the following - mortality, ICU admission, requirement for IMV, or clinically diagnosed with refractory, progressive, severe or critical disease according to WHO criteria) | 45 studies         | 22091 participants | Hospital     | The majority of the studies were set in China (n = 40), with the remainder in Korea (n = 1), USA (n = 2), and France (n = 2). |

| Study ID   | Review objective as stated by authors                                                                                                                                                                                                                                                                                   | Inclusion criteria as stated by authors                                                                                                                                                                                               | Search month (year) | Databases searched                 | Outcomes reported | # included studies | # participants      | Setting(s)   | Country(s)         |
|------------|-------------------------------------------------------------------------------------------------------------------------------------------------------------------------------------------------------------------------------------------------------------------------------------------------------------------------|---------------------------------------------------------------------------------------------------------------------------------------------------------------------------------------------------------------------------------------|---------------------|------------------------------------|-------------------|--------------------|---------------------|--------------|--------------------|
|            | hospitalized due to COVID-19. The exploratory objective is to report putative prognostic factors as identified in studies with hospitalized patients living with diabetes who developed severe COVID-19 clinical course.                                                                                                | diabetes) with a group of unexposed individuals (people without diabetes). Only peer-reviewed, published studies were included. Non-English language studies were excluded.                                                           |                     |                                    |                   |                    |                     |              |                    |
| Kumar 2021 | We aimed to pool and analyse two or more co-morbid factors, such as smoking, diabetes, hypertension and cardiovascular disease. In addition, an appraisal of their cumulative risk associated with clinical outcomes in terms of severity, morbidity and mortality of hospitalized COVID-19 patients has been reviewed. | All case studies of COVID-19, all confirmed positive cases with laboratory-identified SARS-CoV-2 infection by real-time reverse-transcriptase polymerase chain reaction (RT-PCR), demographic data, clinical symptoms and treatments. | 6 (2020)            | PubMed, Scopus, and Google Scholar | severity          | 19 studies         | 12,037 participants | Not reported | China, USA, Europe |
| Kaur 2020  | The primary aim of this study was                                                                                                                                                                                                                                                                                       | Peer-reviewed published articles that reported cases                                                                                                                                                                                  | 4 (2020)            | PubMed                             | Prevalence        | 50                 | 6635                | Not reported | Multiple           |

| Study ID     | Review objective as stated by authors                                                                                                                                     | Inclusion criteria as stated by authors                                                                                                                                                                                                                                                                                                                                                          | Search month (year) | Databases searched                                                    | Outcomes reported        | # included studies | # part-icipants | Setting(s)   | Country(s)        |
|--------------|---------------------------------------------------------------------------------------------------------------------------------------------------------------------------|--------------------------------------------------------------------------------------------------------------------------------------------------------------------------------------------------------------------------------------------------------------------------------------------------------------------------------------------------------------------------------------------------|---------------------|-----------------------------------------------------------------------|--------------------------|--------------------|-----------------|--------------|-------------------|
|              | to evaluate the epidemiological and clinical characteristics of COVID-19 patients while also highlighting the comorbidities and radiological findings.                    | with confirmed SARS-CoV-2 infection and have details on demographics, clinical symptoms, imaging features, and coexisting comorbidities. All studies that had information on above mentioned characteristics in COVID-19 patients were included                                                                                                                                                  |                     |                                                                       |                          |                    |                 |              |                   |
| Khan 2020    | This study aimed to assess the prevalence of pre-existing comorbidities among COVID-19 patients and their mortality risks with each category of pre-existing comorbidity. | (i) conducted for the hospitalized patients infected with COVID-19 with or without pre-existing comorbidities, (ii) presented survivor and non-survivor counts following COVID-19 among patients with or without pre-existing morbidity or presented hazard/risk/odds ratio of deaths or survival following COVID-19 with the types of morbidities, and (iii) published in the English language. | 5 (2020)            | Medline, Web of Science, Scopus, and CINAHL                           | Prevalence and mortality | 41                 | 27,670          | not reported | Majority in China |
| Khateri 2020 | The aim of this study was to determine the prevalence of underlying diseases and associated comorbidities in COVID-19 patients using a systematic                         | In this study, full-text articles published as original research in scientific journals were selected in the first step.                                                                                                                                                                                                                                                                         | 7 (2020)            | PubMed (including Medline), Web of Science, Scopus, CINAHL and Embase | Prevalence               | 12                 | 2393            | Not reported | China             |

| Study ID       | Review objective as stated by authors                                                                                                                                                                                                                                      | Inclusion criteria as stated by authors                                                                                                                                                                                                                                                                                                                                                                                                                                                                                                                                             | Search month (year) | Databases searched                      | Outcomes reported                     | # included studies | # part-icipants | Setting(s)                                 | Country(s)                                 |
|----------------|----------------------------------------------------------------------------------------------------------------------------------------------------------------------------------------------------------------------------------------------------------------------------|-------------------------------------------------------------------------------------------------------------------------------------------------------------------------------------------------------------------------------------------------------------------------------------------------------------------------------------------------------------------------------------------------------------------------------------------------------------------------------------------------------------------------------------------------------------------------------------|---------------------|-----------------------------------------|---------------------------------------|--------------------|-----------------|--------------------------------------------|--------------------------------------------|
|                | review and meta-analysis.                                                                                                                                                                                                                                                  |                                                                                                                                                                                                                                                                                                                                                                                                                                                                                                                                                                                     |                     |                                         |                                       |                    |                 |                                            |                                            |
| Kow 2020       | We performed a meta-analysis of the current studies to explore whether the use of metformin was associated with decreased mortality in COVID-19 patients.                                                                                                                  | Cohort or case-control design, included patients with confirmed COVID-19, and with data available to compare the risk of mortality among metformin users compared to non-metformin users in adjusted analyses.                                                                                                                                                                                                                                                                                                                                                                      | 8 (2020)            | PubMed, Scopus, Goggle Scholar, medRxiv | Mortality by metformin use            | 5                  | 8121            | States hospitalised for COVID-19           | 2 USA, 2 China, 1 France                   |
| Kumar 2020 (1) | This meta-analysis was conducted with the primary objective of exploring the relationship between underlying diabetes and severity and mortality of COVID-19 disease; and with the secondary objective of determining the prevalence of diabetes inpatients with COVID-19. | (1) The studies should be in English language in the PubMed database. (2) The study design should be case-control and should have categorized the patients into two or more groups depending on the severity, clinical course, or mortality of the patients with COVID-19 (i.e. composite endpoint). Studies without this categorization were not included. The study should have data of diabetes mellitus in each group. (3) The study should be observational (4) The study should have included at least 100 patients of COVID-19.(5) The participants should be adult patients | 4 (2020)            | PubMed only                             | Prevalence, severe disease, mortality | 33                 | 16003           | Reported for individual studies in table 1 | Reported for individual studies in table 1 |

| Study ID       | Review objective as stated by authors                                                                                                                                                                                                                    | Inclusion criteria as stated by authors                                                                                                                                                                                                                         | Search month (year) | Databases searched                                                                          | Outcomes reported                                                                                                       | # included studies | # participants                       | Setting(s)             | Country(s)                                                                                                                                   |
|----------------|----------------------------------------------------------------------------------------------------------------------------------------------------------------------------------------------------------------------------------------------------------|-----------------------------------------------------------------------------------------------------------------------------------------------------------------------------------------------------------------------------------------------------------------|---------------------|---------------------------------------------------------------------------------------------|-------------------------------------------------------------------------------------------------------------------------|--------------------|--------------------------------------|------------------------|----------------------------------------------------------------------------------------------------------------------------------------------|
| Kumar 2020 (2) | This systematic review and meta-analysis were conducted with following objectives: (1) to study the demographic, clinical and laboratory manifestations of COVID-19; and (2) to determine the factors associated with severe clinical course of COVID-19 | (1) The studies should be in English language; (2) The studies should be published in full (3) the study design should be retrospective or prospective observational or case control study (4) the participants should be adult patients with COVID-19 disease. | 3 (2020)            | PubMed                                                                                      | Association of co-morbidities with severe clinical course                                                               | 58                 | 6892                                 | Not reported           | China, Hong Kong, Singapore, South Korea, Australia and Europe - NB 97.5% of patients included were from mainland china                      |
| Lee 2020       | This meta-analysis aims to determine if hyperglycaemia may be associated with an increased severity of COVID-19.                                                                                                                                         | Original articles that examined the severity of COVID-19 in hyperglycaemic patients, determined by variables such as mortality and ICU admissions were included.                                                                                                | Not reported        | PubMed, Embase and China National Knowledge Infrastructure                                  | ICU admission and mortality by hyperglycaemia                                                                           | 8                  | 681 with diabetes and hyperglycaemia | Not reported           | Not reported                                                                                                                                 |
| Li 2020 (1)    | The aim of this systematic review and meta-analysis aims to elucidate regional variations in baseline clinical characteristics, presentation and factors associated with outcomes in COVID-19 patients including sub-group analysis by                   | Original research articles were included if they fulfilled the following criteria: (1) laboratory confirmed COVID-19 and (2) if the study provided information about clinical features and outcomes of COVID-19.                                                | 4 (2020)            | PubMed, Embase, Scopus, the Cochrane library, the Chinese Medical Journal, BioRxiv, MedRxiv | Association of co-morbidities with severe clinical course<br>Association of co-morbidities with mortality from COVID-19 | 212                | 281,461                              | Hospital/Tertiary Care | Mainland China 180, USA 8, South Korea 6, Singapore 3, Italy 3, Taiwan 3, UK 2, Hong Kong 2, Canada 1, Japan 1, Vietnam 1, and more than one |

| Study ID    | Review objective as stated by authors                                                                                                                                                                       | Inclusion criteria as stated by authors                                                                                                                                                                                                                                                                                                                                 | Search month (year) | Databases searched                                                    | Outcomes reported                                                                                                                  | # included studies                                           | # part-icipants | Setting(s)   | Country(s)       |
|-------------|-------------------------------------------------------------------------------------------------------------------------------------------------------------------------------------------------------------|-------------------------------------------------------------------------------------------------------------------------------------------------------------------------------------------------------------------------------------------------------------------------------------------------------------------------------------------------------------------------|---------------------|-----------------------------------------------------------------------|------------------------------------------------------------------------------------------------------------------------------------|--------------------------------------------------------------|-----------------|--------------|------------------|
|             | country/region and by disease severity                                                                                                                                                                      |                                                                                                                                                                                                                                                                                                                                                                         |                     |                                                                       |                                                                                                                                    |                                                              |                 |              | country/region 2 |
| Li 2020 (2) | The current study performed a systematic review and meta-analysis to comprehensively compare the burden and key clinical features of hospitalized patients between the 2009 influenza and COVID-19 pandemic | Studies were included if they met the following criteria: i) they contained clinical characteristics of SARS-CoV-2-confirmed patients and ii) they contained clinical characteristics of 2009 pandemic H1N1 influenza-confirmed patients                                                                                                                                | Not reported        | Medline, Embase, Web of Science, Cochrane CENTRAL, and Google scholar | Prevalence of diabetes as a co-morbidity in hospitalised COVID patients                                                            | 113 - others were regarding influenza as opposed to COVID-19 | 36,422          | Hospital     | Not stated       |
| Li 2020 (3) | The aim of this analysis is to determine the association of cardiovascular metabolic diseases with the development of COVID-19.                                                                             | (1) comparative studies: randomised controlled trials RCTs or non-RCTs published in English; (2) study population: more than ten participants (3) patients in the studies should be confirmed to have been infected by 2019 novel coronavirus; (4) parameters: the comorbidities of cardiovascular metabolic diseases and the outcome of cardiac injury should be given | 2 (2020)            | EMBASE and PubMed                                                     | Proportions of diabetics in COVID-19 patients as well as the incidence of diabetes in severe/ICU cases vs non-icu/non-severe cases | 6                                                            | 1527            | Not reported | China            |
| Li 2020 (4) | We aimed to investigate the relationship between clinical                                                                                                                                                   | (1) cohort studies or case-control studies reporting the clinical characteristics of patients with SARS-                                                                                                                                                                                                                                                                | 4 (2020)            | PubMed, Embase, and Cochrane Library                                  | Severity of COVID                                                                                                                  | 12                                                           | 2,445           | Not reported | China            |

| Study ID    | Review objective as stated by authors                                                                    | Inclusion criteria as stated by authors                                                                                                                                                                                                                                                                                                                                                                                                                                                                                                                                          | Search month (year) | Databases searched                                  | Outcomes reported | # included studies | # participants      | Setting(s)   | Country(s)   |
|-------------|----------------------------------------------------------------------------------------------------------|----------------------------------------------------------------------------------------------------------------------------------------------------------------------------------------------------------------------------------------------------------------------------------------------------------------------------------------------------------------------------------------------------------------------------------------------------------------------------------------------------------------------------------------------------------------------------------|---------------------|-----------------------------------------------------|-------------------|--------------------|---------------------|--------------|--------------|
|             | characteristics, outcomes and the severity of severe acute respiratory syndrome coronavirus 2 pneumonia. | CoV2infection; (2) one or more clinical features were analysed, including epidemiology, clinical symptoms, laboratory findings, comorbidities, treatment, complications, and outcomes; and (3) patients were grouped according to the severity of disease, for example, severe and non-severe groups or ICU and non-ICU groups.                                                                                                                                                                                                                                                  |                     |                                                     |                   |                    |                     |              |              |
| Li 2021 (1) | We aimed to systematically identify the possible risk factors responsible for severe cases.              | Inclusion criteria:(1) case-control studies or cohort studies; (2) articles reporting the clinical characteristics and the severity of disease in patients diagnosed with COVID-19; (3) articles reporting the severity of COVID-19 and details of related factors; (4) articles reporting the specific grading standards of the severity of COVID-19. The definition of severe disease was based on clinical symptoms, i.e., patients having severe dyspnea, extremely low oxygen saturation, respiratory distress or requiring mechanical ventilation, ICU admission or death. | 2 (2021)            | PubMed, Embase, Web of science and Cochrane Library | severe disease    | 41 studies         | 21,060 participants | Not reported | Not reported |

| Study ID    | Review objective as stated by authors                                                                                                      | Inclusion criteria as stated by authors                                                                                                                                                                                                                                                                                                                                                                                                                                                                                                                                                          | Search month (year) | Databases searched                                                           | Outcomes reported                      | # included studies   | # part-icipants   | Setting(s)   | Country(s)                              |
|-------------|--------------------------------------------------------------------------------------------------------------------------------------------|--------------------------------------------------------------------------------------------------------------------------------------------------------------------------------------------------------------------------------------------------------------------------------------------------------------------------------------------------------------------------------------------------------------------------------------------------------------------------------------------------------------------------------------------------------------------------------------------------|---------------------|------------------------------------------------------------------------------|----------------------------------------|----------------------|-------------------|--------------|-----------------------------------------|
| Li 2021 (2) | We aimed to critically appraise and synthesise published evidence on the risk factors for poor outcomes in hospitalised COVID-19 patients. | <ul style="list-style-type: none"> <li>• Reported data for hospitalised COVID-19 infected patients; AND</li> <li>• Reported data for demographic and/or clinical factors associated with the following poor outcome measures: mortality, ICU admission, and IMV; AND</li> <li>• Case identification was confirmed by: PCR, nucleic acid test, molecular testing, “laboratory diagnosed/confirmed”; AND</li> <li>• Reported adjusted OR/RR/HR, with age and sex being considered for adjustment as a minimum; AND</li> <li>• Used clearly defined demographic and/or clinical factors.</li> </ul> | 5 (2020)            | PubMed, medRxiv and the WHO COVID-19 literature database                     | ICU, mechanical ventilation, mortality | 40 studies           | Not reported      | Hospital     | 95% from China, Europe, USA             |
| Li 2021 (3) | This study aimed to assess the benefits and risks of metformin in COVID-19 patients.                                                       | Observational studies assessing the association between metformin use and the outcomes of COVID-19 patients were included. Studies were included if they: (1) were designed as cohort, cross-sectional, case-control studies; (2) compared the rates of death, risk of intubation, disease deterioration, hospitalization, acute                                                                                                                                                                                                                                                                 | 2 (2021)            | PubMed, Embase, Cochrane Library, and Chinese Biomedical Literature Database | mortality                              | 28 studies, 19 in MA | 2,910,462 overall | Not reported | 14 from Asia, 7 from USA, 7 from Europe |



| Study ID     | Review objective as stated by authors                                                                                                                                                                                                                                                                                                     | Inclusion criteria as stated by authors                                                                                                                                                                                                                                       | Search month (year) | Databases searched                                                                                                                                                                                                           | Outcomes reported                                                                                                                                                                                                   | # included studies | # participants     | Setting(s)   | Country(s)                                                                                     |
|--------------|-------------------------------------------------------------------------------------------------------------------------------------------------------------------------------------------------------------------------------------------------------------------------------------------------------------------------------------------|-------------------------------------------------------------------------------------------------------------------------------------------------------------------------------------------------------------------------------------------------------------------------------|---------------------|------------------------------------------------------------------------------------------------------------------------------------------------------------------------------------------------------------------------------|---------------------------------------------------------------------------------------------------------------------------------------------------------------------------------------------------------------------|--------------------|--------------------|--------------|------------------------------------------------------------------------------------------------|
|              |                                                                                                                                                                                                                                                                                                                                           | respiratory distress syndrome (ARDS), acidosis, and heart failure in COVID-19 patients with and without using metformin, and (3) reported the effect size including odds ratios (ORs), relative risks (RRs), or hazard ratios (HRs) and their 95% confidence intervals (CIs). |                     |                                                                                                                                                                                                                              |                                                                                                                                                                                                                     |                    |                    |              |                                                                                                |
| Liu 2020 (1) | This present study was aimed to provide a systematic evaluation and detailed estimate on the prevalence and effects of pre-existing chronic conditions in COVID-19 patients. This assessment may aid the public health sector while developing policies for surveillance, preparedness, and response to COVID-19 and its severe outcomes. | Articles describing the epidemiological, demographic, clinical features, outcomes and reporting the prevalence of chronic diseases in COVID-19 patient                                                                                                                        | 4 (2020)            | PubMed, Ovid MEDLINE, EMBASE, CDC, and NIH databases later an additional eight reports were identified from a search of the bibliographies of previously obtained articles and other sources such as Google, Google Scholar, | incidence of comorbid disease in patients with covid-19, association between pre-existing chronic diseases and clinical outcomes (disease severity, admittance to ICU and mortality rate) in patients with COVID-19 | 24                 | 10948              | Not reported | Among them, 20 studies were from China, 2 from United States, 1 from Italy, and 1 from France. |
| Liu 2020 (2) | The present study was undertaken to provide a systematic                                                                                                                                                                                                                                                                                  | Articles were eligible for inclusion if they met the following criteria: (1) those that were clinical studies or                                                                                                                                                              | 4 (2020)            | MEDLINE via PubMed, Embase, Web of Science, and the Cochrane Library                                                                                                                                                         | Prevalence                                                                                                                                                                                                          | 12 for COVID-19    | 51268 for COVID-19 | Not reported | Not reported                                                                                   |

| Study ID    | Review objective as stated by authors                                                                                                                                                                                                                                                                                                           | Inclusion criteria as stated by authors                                                                                                                                                                                                                                                                                    | Search month (year) | Databases searched                                                                          | Outcomes reported      | # included studies                                                                                                       | # part-icipants                                                                                  | Setting(s)   | Country(s)                                                             |
|-------------|-------------------------------------------------------------------------------------------------------------------------------------------------------------------------------------------------------------------------------------------------------------------------------------------------------------------------------------------------|----------------------------------------------------------------------------------------------------------------------------------------------------------------------------------------------------------------------------------------------------------------------------------------------------------------------------|---------------------|---------------------------------------------------------------------------------------------|------------------------|--------------------------------------------------------------------------------------------------------------------------|--------------------------------------------------------------------------------------------------|--------------|------------------------------------------------------------------------|
|             | evaluation and detailed estimate of the prevalence of cardiovascular comorbidities (hypertension, cardiac disease, and diabetes mellitus) in SARS, MERS and COVID-19 cases.                                                                                                                                                                     | consecutive cases about human; (2) required clinical data could be extracted from articles; and (3) at least 3 cases were reported in an article.                                                                                                                                                                          |                     |                                                                                             |                        |                                                                                                                          |                                                                                                  |              |                                                                        |
| Lu 2020     | Coronavirus Disease 2019 (COVID-19) is a pandemic. This systematic review compares mortality risk factors including clinical, demographic and laboratory features of COVID-19, Severe Acute Respiratory Syndrome (SARS) and Middle East Respiratory Syndrome (MERS). The aim is to provide new strategies for COVID-19 prevention and treatment | (I) Studies included patients infected by SARS-CoV-2, SARS-CoV, and MERS-CoV. (II) Patients in the studies had clinical outcomes including death. (III) Studies reported demographic characteristics, clinical manifestations, laboratory indicators and imaging. (IV) Articles were written in either Chinese or English. | 4 (2020)            | MEDLINE, EPISTEMONIKOS, COCHRANE, China National Knowledge Infrastructure and WANFANG STATA | mortality              | 28 studies (including SARS and MERS only and studies only looking at lab indicators)<br><br>5 studies regarding diabetes | 11818 COVID patients (looking at lab indicators as well, patients looking only at diabetes- 2307 | Not reported | Beijing, Guangdong, Shanxi, Hong Kong and Taiwan in China, and Toronto |
| Lukito 2020 | In light of paucity regarding high-                                                                                                                                                                                                                                                                                                             | primarily observational studies (cross-sectional,                                                                                                                                                                                                                                                                          | 9 (2020)            | Pubmed, EuropePMC, EBSCOhost, Proquest,                                                     | Mortality by metformin | 9                                                                                                                        | 10233                                                                                            | Hospital     | 3 from USA, 2 from UK, 2                                               |

| Study ID | Review objective as stated by authors                                                                                                                                                                                                                                                                                      | Inclusion criteria as stated by authors                                                                                                                                                                         | Search month (year) | Databases searched                                                  | Outcomes reported                             | # included studies | # participants | Setting(s) | Country(s)                                                            |
|----------|----------------------------------------------------------------------------------------------------------------------------------------------------------------------------------------------------------------------------------------------------------------------------------------------------------------------------|-----------------------------------------------------------------------------------------------------------------------------------------------------------------------------------------------------------------|---------------------|---------------------------------------------------------------------|-----------------------------------------------|--------------------|----------------|------------|-----------------------------------------------------------------------|
|          | quality data of metformin consumption and mortality in COVID-19 patients, we want to explore the state-of-the-art evidence regarding this critical topic through this systematic review and meta-analysis.                                                                                                                 | case-control, retrospective/prospective cohort studies) that reported the odds ratios (ORs) or hazard ratios (HRs) in adjusted and non-adjusted forms regarding patients who consume metformin vs who did not.  |                     | Cochrane library. preprint.org and Medrxiv                          |                                               |                    |                |            | from China, 1 from South Korea, 1 from France                         |
| Luo 2020 | In this study, we conducted a systematic review of available studies to assess the association between underlying comorbidities and acute cardiac injury and the severity or the prognosis in COVID-19 patients. The underlying comorbidities and cardiac injury may be associated with the prognosis in COVID-19 patients | Eligible studies should be written in English, and describe the relationship between age, gender, comorbidities and the prognosis of adult COVID-19 patients. The number of enrolled patients is more than ten. | 7 (2020)            | PubMed, EMBASE (by Ovidsp), Web of Science and The Cochrane Library | COVID-19 severity, survivors vs non survivors | 124                |                |            | Asia, the minority was from the USA, Italy, Spain and other countries |

| Study ID       | Review objective as stated by authors                                                                                                                                                                                                                                                                                                                                                                                     | Inclusion criteria as stated by authors                                                                                                                                                                                                                                                                                                               | Search month (year) | Databases searched                                                                                     | Outcomes reported                                      | # included studies                    | # part-icipants    | Setting(s)   | Country(s)                                                                                                                                                                                                                             |
|----------------|---------------------------------------------------------------------------------------------------------------------------------------------------------------------------------------------------------------------------------------------------------------------------------------------------------------------------------------------------------------------------------------------------------------------------|-------------------------------------------------------------------------------------------------------------------------------------------------------------------------------------------------------------------------------------------------------------------------------------------------------------------------------------------------------|---------------------|--------------------------------------------------------------------------------------------------------|--------------------------------------------------------|---------------------------------------|--------------------|--------------|----------------------------------------------------------------------------------------------------------------------------------------------------------------------------------------------------------------------------------------|
| Maddaloni 2021 | We conducted a systematic review and meta-analysis of studies reporting clinical outcomes of subjects hospitalized for Covid-19 with and without history of cardiovascular disease. We secondarily aimed to investigate whether cardiovascular disease further increases the risk of poor Covid-19 outcomes in the high-risk group of people with diabetes mellitus, which may be considered a cardiovascular equivalent. | Observational studies published in English language, reporting original clinical data about history of cardiovascular disease in Covid-19 inpatients aged > 18 years old with and without at least one outcome among death, mechanical ventilation, admission in an intensive care unit (ICU), or a composite outcome with at least one of the above. | 10 (2020)           | PubMed                                                                                                 | mortality (subgroup of patients with CVD and diabetes) | 33 studies (4 relevant to review Q)   | 52857 participants | Hospital     | China (n = 11, 33.3%), Italy (n = 6, 18.2%) and United States (n = 5, 15.2%). The remaining studies were from United Kingdom (n = 3), Korea (n = 2), Spain (n = 2), France (n = 1), Greece (n = 1), Poland (n = 1) and Brazil (n = 1). |
| Mahumud 2020   | The main purpose of this study was to examine the overall distribution of chronic comorbidities in coronavirus disease-19 (COVID-19)                                                                                                                                                                                                                                                                                      | Eligible studies were included if they 1) were original articles; 2) published between January 2020 and April 9th, 2020; focused on 3) epidemiological perspective, 4) reported clinical characteristics of the COVID-19 among                                                                                                                        | 4 (2020)            | PubMed, Scopus, EBSCOhost (CINAHL, Medline), Web of Science, and the first 20 pages of Google Scholar. | Mortality                                              | 23 studies (21 reporting on diabetes) | 202005             | Not reported | Not reported                                                                                                                                                                                                                           |

| Study ID       | Review objective as stated by authors                                                                                                                                                                                                                                                                                               | Inclusion criteria as stated by authors                                                                                                                                                                                                                                                                                                                                                                                                              | Search month (year) | Databases searched                | Outcomes reported                     | # included studies | # participants | Setting(s)   | Country(s)                                                                                                               |
|----------------|-------------------------------------------------------------------------------------------------------------------------------------------------------------------------------------------------------------------------------------------------------------------------------------------------------------------------------------|------------------------------------------------------------------------------------------------------------------------------------------------------------------------------------------------------------------------------------------------------------------------------------------------------------------------------------------------------------------------------------------------------------------------------------------------------|---------------------|-----------------------------------|---------------------------------------|--------------------|----------------|--------------|--------------------------------------------------------------------------------------------------------------------------|
|                | infected populations and the risk of the underlying burden of disease in terms of the case fatality ratio (CFR).                                                                                                                                                                                                                    | infected people, and 5) reported the prevalence of chronic comorbid conditions in infected patients.                                                                                                                                                                                                                                                                                                                                                 |                     |                                   |                                       |                    |                |              |                                                                                                                          |
| Mair 2020      | The objective of this meta-analysis was to look at the pooled prevalence of symptoms, laboratory tests, and imaging of all COVID-19 infected patients.                                                                                                                                                                              | Not reported                                                                                                                                                                                                                                                                                                                                                                                                                                         | 5 (2020)            | PubMed, EMBASE, and Ovid          | Pooled prevalence and hospitalisation | 67                 | 8302           | Not reported | Predominantly China, but also Europe, Singapore, Australia, India, Iran and Japan.                                       |
| Mantovani 2020 | We have carried out an updated and comprehensive systematic review and meta-analysis of observational studies that have estimated the global prevalence of pre-existing diabetes in patients admitted to hospital with laboratory-confirmed SARS-CoV-2 infection. We also examined whether there is an association between presence | (1) observational studies examining the clinical and biochemical characteristics of hospitalized patients with laboratory-confirmed COVID-19; and (2) all studies that reported data on presence of established diabetes among hospitalized patients with COVID-19. Study participants included in the meta-analysis were adult individuals (aged>18 years) of either sex without any restriction in terms of age, race, ethnicity or comorbidities. | 5 (2020)            | PubMed, Scopus and Web of Science | Prevalence, severity, mortality       | 83                 | 78874          | Hospital     | Multiple - sixty-two studies were conducted in Asian countries, mostly in China, and 21 studies were conducted in Europe |

| Study ID         | Review objective as stated by authors                                                                                                                                                                                                                        | Inclusion criteria as stated by authors                                                                                                                                                                                                                                                                                                                                                                                              | Search month (year) | Databases searched                                         | Outcomes reported       | # included studies | # participants       | Setting(s)               | Country(s)                                                                                                  |
|------------------|--------------------------------------------------------------------------------------------------------------------------------------------------------------------------------------------------------------------------------------------------------------|--------------------------------------------------------------------------------------------------------------------------------------------------------------------------------------------------------------------------------------------------------------------------------------------------------------------------------------------------------------------------------------------------------------------------------------|---------------------|------------------------------------------------------------|-------------------------|--------------------|----------------------|--------------------------|-------------------------------------------------------------------------------------------------------------|
|                  | of pre-existing diabetes and severity of COVID-19 illness or risk of in-hospital mortality amongst infected patients.                                                                                                                                        |                                                                                                                                                                                                                                                                                                                                                                                                                                      |                     |                                                            |                         |                    |                      |                          |                                                                                                             |
| Matsushita 2020  | To identify whether cardiovascular disease (CVD) and its traditional risk factors predict severe coronavirus disease 2019 (COVID-19)                                                                                                                         | Not reported                                                                                                                                                                                                                                                                                                                                                                                                                         | 4 (2020)            | PubMed and Embase                                          | Severe COVID            | 25                 | 76,638               | Not reported             | China (21/25)                                                                                               |
| Mattey-Mora 2022 | to determine the background characteristics and pre-existing comorbidities associated with hospitalisation for COVID-19 patients. This will help identify the most vulnerable populations for severe COVID-19 infections that would require hospitalisation. | Cross-sectional, cohort (retrospective/prospective), and case-series studies with laboratory-confirmed diagnoses for COVID-19 (according to World Health Organisation guidance), which examined patient demographic factors such as ethnicity/race, sex, smoking status, and pre-existing comorbidities including cardiovascular diseases, diabetes mellitus, hypertension, obesity, renal chronic disease, and respiratory diseases | 12 (2020)           | PubMed, Web of Science, and Cochrane Library               | risk of hospitalisation | 40 studies         | 1002006 participants | Hospital and outpatients | Majority in United States (27 studies), Mexico, United Kingdom, Spain (2 studies conducted in each country) |
| Mehraeen 2020    | The aim of this study was to systematically review the                                                                                                                                                                                                       | The English-written peer-reviewed original papers published from January 1,                                                                                                                                                                                                                                                                                                                                                          | 6 (2020)            | PubMed, Scopus, Embase, Google Scholar, and Web of Science | Mortality               | 114                | 310494               | Hospital                 | Not reported                                                                                                |

| Study ID   | Review objective as stated by authors                                                                                                                                                                     | Inclusion criteria as stated by authors                                                                                                                                                                                 | Search month (year) | Databases searched                                      | Outcomes reported                                                | # included studies | # participants    | Setting(s)   | Country(s)                                                                    |
|------------|-----------------------------------------------------------------------------------------------------------------------------------------------------------------------------------------------------------|-------------------------------------------------------------------------------------------------------------------------------------------------------------------------------------------------------------------------|---------------------|---------------------------------------------------------|------------------------------------------------------------------|--------------------|-------------------|--------------|-------------------------------------------------------------------------------|
|            | assessment of risk and model the predictors of mortality in COVID-19 patients.                                                                                                                            | 2020, to June 27, were included.                                                                                                                                                                                        |                     |                                                         |                                                                  |                    |                   |              |                                                                               |
| Meng 2020  | To conduct a meta-analysis to investigate the relationship between severe COVID-19 and underlying CHD, hypertension and diabetes                                                                          | Not reported                                                                                                                                                                                                            | 7 (2020)            | PubMed, Cochrane, Web of Science, WanFang Data and CNKI | the association between diabetes and severe COVID-19 (pooled OR) | 32                 | 8170              | Not reported | Majority Asia (China, South Korea), also US, Australia, Italy, France, Poland |
| Meng 2021  | To effectively predict the progression of COVID-19 via patients' clinical features at an early stage, the prevalence of these clinical factors and their relationships with severe illness were assessed. | Without limiting the language of the articles, including those describing the epidemiological and clinical characteristics of COVID-19 cases                                                                            | 4 (2020)            | PubMed, Embase, Web of Science, and Chinese databases   | prevalence and progression to severe disease                     | 24 studies         | 3547 participants | Not reported | China                                                                         |
| Mesas 2020 | Risk factors for in-hospital mortality in confirmed COVID-19 patients have been summarized in numerous meta-analyses, but it is still unclear                                                             | (i) participants—100 and more patients with confirmed COVID-19; (ii) design—observational studies (prospective or retrospective) with primary individual data for each mortality outcome group, i.e., non-survivors and | 7 (2020)            | e MEDLINE (via PubMed), Scopus and Web of Science       | mortality                                                        | 60                 | 51,225            | Not reported | Predominantly china                                                           |

| Study ID    | Review objective as stated by authors                                                                                                                                                                          | Inclusion criteria as stated by authors                                                                                                                                                                                                                                                              | Search month (year) | Databases searched                                                                                                              | Outcomes reported | # included studies      | # participants     | Setting(s)   | Country(s)                                                         |
|-------------|----------------------------------------------------------------------------------------------------------------------------------------------------------------------------------------------------------------|------------------------------------------------------------------------------------------------------------------------------------------------------------------------------------------------------------------------------------------------------------------------------------------------------|---------------------|---------------------------------------------------------------------------------------------------------------------------------|-------------------|-------------------------|--------------------|--------------|--------------------------------------------------------------------|
|             | whether they vary according to the age, sex and health conditions of the studied populations. This study explored these variables as potential mortality predictors.                                           | survivors; (iii) exposure variables (iv) outcome—all patients followed up to definitive hospital discharge or COVID-19 mortality.                                                                                                                                                                    |                     |                                                                                                                                 |                   |                         |                    |              |                                                                    |
| Miller 2020 | The purpose of this systematic review with meta-analysis was to determine the mortality rate of hospitalized patients with Covid-19 in China and to identify factors that may potentially influence this rate. | Observational studies that reported the mortality rate of hospitalized patients in China with a confirmed diagnosis of Covid-19.                                                                                                                                                                     | 3 (2020)            | Medline, Embase, and the Cochrane Central Register of Controlled Trials, the Directory of Open Access Journals, Google Scholar, | Mortality         | 16                      | 1832               | Hospital     | China                                                              |
| Minh 2021   | to systematically review the published literature on the Covid-19 to estimate the frequency of clinical symptoms by comparing different clinical presentations based on the severity and living                | all possible case reports, case series, and epidemiological observational studies containing any medical information or clinical investigation of confirmed SARS-CoV-2 cases, regardless of the country and time of examination. We also included non-English articles that were written in Chinese. | 3 (2020)            | PubMed, EMBASE, SCOPUS, Web of Science (WoS), Google Scholar, Cochrane Library and WHO Global Health Library (WHO GHL)          | mortality         | 171 studies (148 in MA) | 62909 participants | Not reported | Primarily China (n = 146), South Korea (n = 6), Singapore (n = 3). |



| Study ID       | Review objective as stated by authors                                                                                                                                                                                                                                                                                                                                                                     | Inclusion criteria as stated by authors                                                                                                                                                                                                                                                                                                                                                                                                                                                                                          | Search month (year) | Databases searched                                                                                                                                                                                                                                                                                                     | Outcomes reported        | # included studies | # part-icipants     | Setting(s)   | Country(s)                             |
|----------------|-----------------------------------------------------------------------------------------------------------------------------------------------------------------------------------------------------------------------------------------------------------------------------------------------------------------------------------------------------------------------------------------------------------|----------------------------------------------------------------------------------------------------------------------------------------------------------------------------------------------------------------------------------------------------------------------------------------------------------------------------------------------------------------------------------------------------------------------------------------------------------------------------------------------------------------------------------|---------------------|------------------------------------------------------------------------------------------------------------------------------------------------------------------------------------------------------------------------------------------------------------------------------------------------------------------------|--------------------------|--------------------|---------------------|--------------|----------------------------------------|
|                | status of the cases.                                                                                                                                                                                                                                                                                                                                                                                      |                                                                                                                                                                                                                                                                                                                                                                                                                                                                                                                                  |                     |                                                                                                                                                                                                                                                                                                                        |                          |                    |                     |              |                                        |
| Mirjalili 2021 | Currently, the number of patients with SARS-COV-2 infection has increased rapidly in Iran, but the risk and mortality of SARS-COV-2 infection in Iranian patients with diabetes mellitus (DM), chronic kidney disease (CKD), hypertension and cardiovascular diseases (CVDs) still not clear. The aim of this meta-analysis was to estimate the proportion and mortality of SARS-COV-2 in these patients. | (1) primary case series and case-control publications; (2) studies evaluated clinical characteristics and outcome of SARS-CoV-2 infection Iranian patients with diabetes mellitus, chronic kidney disease, hypertension and cardiovascular disease; (3) studies reported mortality of SARS-CoV-2 infection Iranian patients with diabetes mellitus, chronic kidney disease, hypertension and cardiovascular disease; and (4) sufficient data were presented to calculate the odds ratio (OR) with 95 % confidence interval (CI). | 1 (2021)            | PubMed/MEDLINE, Google Scholar, EMBASE, Cochrane Library database, SciELO, Springer Link, Chinese Biomedical Database (CBD), China National Knowledge Infrastructure (CNKI) platforms, VIP, Chinese literature (Wan Fang) and China Science and Technology Journal database and Egyptian Knowledge Bank (EKB) Journals | prevalence and mortality | 10 studies         | 11,755 participants | Not reported | Iran                                   |
| Mishra 2021    | We aim to assess the association of CVD with the severity and mortality of COVID-19.                                                                                                                                                                                                                                                                                                                      | The studies assessing comorbid CVD according to disease severity were included. We included observational studies that includes case-control, cross-sectional, and both retrospective and prospective cohort designs.                                                                                                                                                                                                                                                                                                            | 9 (2020)            | PubMed, Cochrane Library, Google Scholar                                                                                                                                                                                                                                                                               | severity and mortality   | 19 studies         | 6872 participants   | Not reported | 17 from China, 1 each from US and Iran |

| Study ID      | Review objective as stated by authors                                                                                                                                                                                                                                                                                                                      | Inclusion criteria as stated by authors                                                                                                                                                                                                                                                                                                                                      | Search month (year) | Databases searched                           | Outcomes reported | # included studies | # part-icipants | Setting(s)   | Country(s)                                                                                                                       |
|---------------|------------------------------------------------------------------------------------------------------------------------------------------------------------------------------------------------------------------------------------------------------------------------------------------------------------------------------------------------------------|------------------------------------------------------------------------------------------------------------------------------------------------------------------------------------------------------------------------------------------------------------------------------------------------------------------------------------------------------------------------------|---------------------|----------------------------------------------|-------------------|--------------------|-----------------|--------------|----------------------------------------------------------------------------------------------------------------------------------|
|               |                                                                                                                                                                                                                                                                                                                                                            | We also included case series with sample size $\geq 30$ patients as the disease we are trying to study is new.                                                                                                                                                                                                                                                               |                     |                                              |                   |                    |                 |              |                                                                                                                                  |
| Moula 2020    | The aim of this meta-analysis is to quantify the risk of mortality in coronavirus disease 2019 (COVID-19) patients. A meta-analysis was conducted analysing the impact of (1) sex, (2) age, (3) CVD with coronary artery disease (CAD), (4) CAD alone, (5) CVD without CAD, (6) hypertension, (7) cerebrovascular diseases, and (8) diabetes on mortality. | The articles were selected based on the following inclusion criteria: (1) human studies; (2) full articles about COVID-19 disease containing separate data for patients that survived and patients that did not; (3) analyses of fatality cases; (4) studies including at least 10 patients; (5) articles published from December 2019 and (6) articles in English language. | 5 (2020)            | Pubmed                                       | Mortality         | 26                 | 8497            | Not reported | Twenty papers from China, two papers from Italy, two papers from Korea, one from Iran and one from the United States of America. |
| Mudatsir 2020 | To identify the predictors associated with poor clinical outcomes in patients with COVID-19                                                                                                                                                                                                                                                                | Ssessed the clinical manifestations and laboratory findings of patients with mild to severe COVID-19; (2) provided adequate data for the calculation of OR and 95% CI.                                                                                                                                                                                                       | 4 (2020)            | PubMed, Embase, Cochrane, and Web of Science | COVID-19 severity | 19                 | 3578            | Hospital     | China                                                                                                                            |

| Study ID    | Review objective as stated by authors                                                                                                           | Inclusion criteria as stated by authors                                                                                                                                                                                                                                                                                                                                                                                                                              | Search month (year) | Databases searched                                                              | Outcomes reported                                                                                         | # included studies | # participants | Setting(s)           | Country(s)                       |
|-------------|-------------------------------------------------------------------------------------------------------------------------------------------------|----------------------------------------------------------------------------------------------------------------------------------------------------------------------------------------------------------------------------------------------------------------------------------------------------------------------------------------------------------------------------------------------------------------------------------------------------------------------|---------------------|---------------------------------------------------------------------------------|-----------------------------------------------------------------------------------------------------------|--------------------|----------------|----------------------|----------------------------------|
| Nandy 2020  | To evaluate the impact of various morbidities on serious events in COVID 19.                                                                    | We included only human studies and articles with clearly defined clinical outcome measures.                                                                                                                                                                                                                                                                                                                                                                          | 4 (2020)            | PubMed, Cochrane Central Register of Clinical Trials                            | Mortality, serious events and mortality                                                                   | 16                 | 3994           | Not reported         | China                            |
| Ng 2021     | To evaluate the correlation between comorbidities and their role in the exacerbation of disease in COVID-19 patients leading to fatal outcomes. | 1. Only studies reporting comorbidities and patient's outcome were included. 2. Only peer-reviewed journals were included.                                                                                                                                                                                                                                                                                                                                           | 09 (2020)           | MEDLINE, Scopus, Web of Science, and EMBASE                                     | Mortality                                                                                                 | 53                 | 375,859        | Not reported         | Across 14 countries              |
| Ng 2022     | Quantified the impact of DM, HTN, IHD and myocardial injury on six adverse COVID-19 outcomes in unvaccinated individuals                        | (i) patients $\geq 18$ years of age with suspected or confirmed SARS-CoV-2 infection (COVID-19); (ii) pre-existing CV risk factors, specifically HTN and DM, IHD, or evidence of myocardial injury (defined as serum troponin level above the 99th percentile upper reference limit); and (iii) COVID-19 related outcomes, in particular all-cause mortality, ARDS, IMV, admission to intensive care (ITUadm), AKI, and study-defined severe COVID-19 disease (SCoV) | 07 (2020)           | MEDLINE, CINAHL, Embase, EMCARE, British Nursing Index) and pre-print (medRxiv) | Mortality, ARDS, invasive mechanical ventilation (IMV), admission to ICU, AKI and severe COVID-19 disease | 110                | 49,017         | In- and out-patients | Reported based on comorbidities  |
| Nguyen 2022 | (1) summarized the effects of every single antidiabetic                                                                                         | RCTs, non-RCTs and observational studies, including prospective and retrospective cohort                                                                                                                                                                                                                                                                                                                                                                             | 11 (2021)           | PubMed/MEDLINE, EMBASE, Scopus, and Web of Science                              | Mortality                                                                                                 | 61                 | 3,061,584      | Not reported         | Reported for individual outcomes |

| Study ID     | Review objective as stated by authors                                                                                                                                                      | Inclusion criteria as stated by authors                                                                                                                                                                                                                                                                                        | Search month (year) | Databases searched                                                     | Outcomes reported                                                | # included studies | # participants | Setting(s)   | Country(s)                                                                       |
|--------------|--------------------------------------------------------------------------------------------------------------------------------------------------------------------------------------------|--------------------------------------------------------------------------------------------------------------------------------------------------------------------------------------------------------------------------------------------------------------------------------------------------------------------------------|---------------------|------------------------------------------------------------------------|------------------------------------------------------------------|--------------------|----------------|--------------|----------------------------------------------------------------------------------|
|              | medication on the mortality of patients with COVID-19 having diabetes and (2) evaluated the dose-responsiveness of the impacts of medications on mortality.                                | studies and case-control studies                                                                                                                                                                                                                                                                                               |                     |                                                                        |                                                                  |                    |                |              |                                                                                  |
| Noor 2020    | The main aim of this study was to find the prevalence of mortality among hospitalized COVID-19 infected patients and associated risk factors for death.                                    | We included the articles assessing the association between age, gender, comorbidities and mortality risk factors from COVID-19 infection as the major outcomes of interest. Articles that reported SARS-CoV-2 infected patients confirmed by real time reverse transcriptase polymerase chain reaction (RT-PCR) were included. | 8 (2020)            | PubMed, Science Direct and Google Scholar                              | Mortality                                                        | 58                 | 122,191        | Not reported | Majority: China 26, 8 in USA, 7 in Italy.                                        |
| Ogungbe 2021 | To quantify the association between biomarkers of myocardial injury (troponin), myocardial stretch (NT-proBNP, Gal-3), coagulation (D-Dimer), inflammation (CRP, IL-6) and severe COVID-19 | 1) study type: retrospective, prospective, observational, or case-control studies, reporting on cardiac biomarkers (specifically Troponin I or T, NT-proBNP, CRP, IL-6, and Gal-3); 2) population: adult patients diagnosed with COVID-19; 3) exposure/intervention: confirmed COVID 19 infection; 4) outcome                  | 01 (2021)           | MEDLINE (PubMed), Embase, CINAHL, Cochrane, Web of Science, and Scopus | Myocardial injury, severe or critical clinical status, and death | 62                 | 41,013         | Not reported | Most studies were conducted in China (50%), Italy (14%), the United States (12%) |

| Study ID | Review objective as stated by authors                                                                                                                                                                                                      | Inclusion criteria as stated by authors                                                                                                                                                                                                | Search month (year) | Databases searched                         | Outcomes reported | # included studies | # participants                                                                               | Setting(s) | Country(s)   |
|----------|--------------------------------------------------------------------------------------------------------------------------------------------------------------------------------------------------------------------------------------------|----------------------------------------------------------------------------------------------------------------------------------------------------------------------------------------------------------------------------------------|---------------------|--------------------------------------------|-------------------|--------------------|----------------------------------------------------------------------------------------------|------------|--------------|
|          | or death in hospitalized patients. We also calculated pooled proportions of underlying co-morbidities (hypertension, CAD, diabetes, COPD, and cancer)                                                                                      | indicators: myocardial injury, severe or critical clinical status, and death.                                                                                                                                                          |                     |                                            |                   |                    |                                                                                              |            |              |
| Pal 2020 | The aim of the study was to provide a comprehensive systematic literature review of DKA and combined DKA/HHS in patients with confirmed COVID-19 in order to analyse the demographic and biochemical parameters and the clinical outcomes. | To identify studies reporting COVID-19 patients with DKA and combined DKA/HHS - no further details.                                                                                                                                    | 8                   | PubMed, Scopus, Embase, and Google Scholar | Mortality         | 19                 | 110 patients<br>91 (83%) patients had DKA alone while 19 (17%) patients had combined DKA/HHS | Hospital   | Not reported |
| Pal 2021 | To provide a precise summary and collate the effect of DPP4i use (preadmission or in-hospital) on mortality in COVID-19 patients                                                                                                           | Observational studies including COVID-19 patients with diabetes mellitus, a proportion who must have been taking DPP4i before hospitalization. Studies reporting in-hospital DPP4i use in COVID-19 patients. Studies should report the | 01 (2021)           | PubMed and Google Scholar                  | Mortality         | 9                  | 7008                                                                                         | Hospital   | Not reported |

| Study ID          | Review objective as stated by authors                                                                                                                                                                          | Inclusion criteria as stated by authors                                                                                                                                                                                                                                                                                  | Search month (year) | Databases searched                           | Outcomes reported   | # included studies | # participants                             | Setting(s) | Country(s)                                                |
|-------------------|----------------------------------------------------------------------------------------------------------------------------------------------------------------------------------------------------------------|--------------------------------------------------------------------------------------------------------------------------------------------------------------------------------------------------------------------------------------------------------------------------------------------------------------------------|---------------------|----------------------------------------------|---------------------|--------------------|--------------------------------------------|------------|-----------------------------------------------------------|
|                   | with diabetes mellitus                                                                                                                                                                                         | data comparing the rate of occurrence of mortality among DPP4i users compared to DPP4i non-users. studies reporting the adjusted odds ratio (OR) of mortality in DPP4i users compared to DPP4i non-users                                                                                                                 |                     |                                              |                     |                    |                                            |            |                                                           |
| Palaiodimos 2020  | The aim of this study was to systematically review and conduct a meta-analysis of the available observational studies reporting the effect of diabetes on mortality among hospitalized patients with COVID-19. | The pre-specified inclusion criteria were as follows: (i) studies which included adult patients hospitalized for COVID-19 and (ii) studies that provided data on any kind of association between diabetes and mortality in the aforementioned population.                                                                | 5 (2020)            | Medline, Embase, Google Scholar, and medRxiv | mortality           | 14                 | 18506, 3713 diabetics, 14793 non-diabetics | Hospital   | Multiple - 5 USA, 2 UK, 1 Spain, 1 Italy, 2 Iran, 3 China |
| Papadopoulos 2021 | To identify all sources reporting mortality rate data regarding COVID-19-related acute metabolic emergencies and summarize their results.                                                                      | (1) refer to COVID-19 patients who had developed either DKA, or HHS, or combined DKA/HHS, or EDKA, (2) are case reports reporting data regarding both primary (survival/discharge vs. death) and secondary (type of metabolic emergency) outcome); (3) are either case report series or cross-sectional studies or meta- | 01 (2021)           | EMBASE and PubMed/Medline                    | Mortality, severity | 41                 | 71                                         | Hospital   | Reported in individual outcomes                           |

| Study ID     | Review objective as stated by authors                                                                                                                                                                                                                                                                     | Inclusion criteria as stated by authors                                                                                                                                                                                                                                                                                                                                                                           | Search month (year) | Databases searched                                                  | Outcomes reported                                                                                                                                                                                | # included studies | # part-icipants | Setting(s)   | Country(s)                              |
|--------------|-----------------------------------------------------------------------------------------------------------------------------------------------------------------------------------------------------------------------------------------------------------------------------------------------------------|-------------------------------------------------------------------------------------------------------------------------------------------------------------------------------------------------------------------------------------------------------------------------------------------------------------------------------------------------------------------------------------------------------------------|---------------------|---------------------------------------------------------------------|--------------------------------------------------------------------------------------------------------------------------------------------------------------------------------------------------|--------------------|-----------------|--------------|-----------------------------------------|
|              |                                                                                                                                                                                                                                                                                                           | analyses of case reports that report mortality rates or enough data to compute it as well as a relevant measure of statistical significance                                                                                                                                                                                                                                                                       |                     |                                                                     |                                                                                                                                                                                                  |                    |                 |              |                                         |
| Parohan 2020 | We aimed to systematically review the present evidence on the association between age, gender, hypertension, diabetes, chronic obstructive pulmonary disease (COPD), cardiovascular diseases (CVDs) and risk of death from COVID-19 infection, and to summarize the available findings in a meta-analysis | (1) all studies assessing the association between age, gender, comorbidities and mortality risk from COVID-19 infection as the major outcomes of interest; (2) observational studies with retrospective design; (3) those that reported hazard ratios (HRs), odds ratios (ORs) or relative risks (RRs) along with 95% confidence intervals (CIs) for the relationship between risk factors and COVID-19 mortality | 5 (2020)            | Web of Science, PubMed, Scopus, Cochrane Library and Google scholar | Associations between age, gender, comorbidities and risk of death from COVID-19                                                                                                                  | 14                 | 29,909          | Not reported | China (12 studies), Italy (1), Iran (1) |
| Parveen 2020 | The aim of the meta-analysis was to assess the association of diabetes and hypertension with severity of disease.                                                                                                                                                                                         | The studies describing the prevalence of diabetes and hypertension according to disease severity were included.                                                                                                                                                                                                                                                                                                   | 3 (2020)            | PubMed, Medline and Cochrane, Google Scholar                        | ICU care, severity (defined as having respiratory distress, RR>30 beats/minute in a resting state, a mean oxygen saturation of <93%, and an arterial blood oxygen partial pressure (PaO2)/oxygen | 7                  | 2018            | Not reported | Not reported                            |

| Study ID           | Review objective as stated by authors                                                                                                                               | Inclusion criteria as stated by authors                                                                                                                                       | Search month (year) | Databases searched                                           | Outcomes reported                                                                                                                                                                   | # included studies                 | # participants | Setting(s)            | Country(s)                                                                  |
|--------------------|---------------------------------------------------------------------------------------------------------------------------------------------------------------------|-------------------------------------------------------------------------------------------------------------------------------------------------------------------------------|---------------------|--------------------------------------------------------------|-------------------------------------------------------------------------------------------------------------------------------------------------------------------------------------|------------------------------------|----------------|-----------------------|-----------------------------------------------------------------------------|
|                    |                                                                                                                                                                     |                                                                                                                                                                               |                     |                                                              | concentration (FiO2)<300 mmHg), mortality                                                                                                                                           |                                    |                |                       |                                                                             |
| Patel 2020 (1)     | We aimed to evaluate epidemiological characteristics, needs of resources, outcomes, and global burden of the disease                                                | Original observational studies that described any details on epidemiological characteristics on patients with COVID-19                                                        | 3 (2020)            | PubMed                                                       | Prevalence of diabetes as a co-morbidity in COVID patients                                                                                                                          | 21                                 | 2747           | Not stated            | China, Singapore, Europe, Australia, USA                                    |
| Patel 2020 (2)     | The objective of this study was to evaluate the risk factors including comorbidities, and complications associated with the poor outcomes amongst COVID-19 patients | All studies describing epidemiology of COVID-19 were included.                                                                                                                | 5 (2020)            | PubMed, Web of Science, Scopus, and medRxiv                  | Risk factors associated with poor outcomes: Prevalence, coexisting comorbidities, complications. Meta-regression on invasive mechanical ventilation (IMV) utilisation and mortality | 29                                 | 12,258         | Hospitalized patients | China mostly, also includes Singapore, Europe (1 study), Australia, USA (5) |
| Patoulas 2021      | To update the previously published meta-analyses.                                                                                                                   | RCTs or observational studies enrolling adult patients with T2DM with prior use of DPP-4 inhibitors versus other antidiabetic drug classes, with confirmed COVID-19 infection | NR                  | PubMed and Cochrane Library                                  | Mortality                                                                                                                                                                           | 10                                 | 7133           | In- and out-patient   | Europe 7, Asia 3                                                            |
| Pinedo-Torres 2020 | We aimed to determine the pooled prevalence of DM and its associated unfavourable                                                                                   | The inclusion criteria were: (1) available data of more than 10 patients; (2) adult patients; (3) number of participants with confirmed diagnosis of                          | 4 (2020)            | Pubmed/Medline, Scopus, Web of Science, Cochrane, and Scielo | Prevalence, ICU admission, death                                                                                                                                                    | 15 studies reporting on SARS-Cov-2 | 3758           | Not reported          | 13/15 studies from China, 1 Italy, 1 Singapore                              |



| Study ID                | Review objective as stated by authors                                                                             | Inclusion criteria as stated by authors                                                                                                                                                                                                                                                                                              | Search month (year) | Databases searched                                      | Outcomes reported                    | # included studies | # part-icipants | Setting(s)   | Country(s)                     |
|-------------------------|-------------------------------------------------------------------------------------------------------------------|--------------------------------------------------------------------------------------------------------------------------------------------------------------------------------------------------------------------------------------------------------------------------------------------------------------------------------------|---------------------|---------------------------------------------------------|--------------------------------------|--------------------|-----------------|--------------|--------------------------------|
|                         | health outcomes in patients with acute respiratory syndromes for coronavirus disease according to virus type.     | DM type I or II; and (4) confirmed diagnosis of coronavirus infection.                                                                                                                                                                                                                                                               |                     |                                                         |                                      |                    |                 |              |                                |
| Pinto 2020              | We aimed to investigate the magnitude of this risk (of diabetes on disease severity) and its dependency on age.   | We performed a systematic search and meta-analysis for clinical reports of COVID-19 infection which included detailed descriptions of patients' clinical profile – specifically, reporting information about the presence of diabetes at admission.                                                                                  | Not reported        | Not reported                                            | Severity - ICU admission, O2 sat<90% | 7                  | 1592            | Hospital     | China                          |
| Plasencia-Urizarri 2020 | To evaluate the risk of severe clinical presentation of COVID-19 in patients with comorbidities.                  | Not reported                                                                                                                                                                                                                                                                                                                         | 3 (2020)            | PubMed, EBSCO, Clinicalkey, Scopus, Embase and HighWire | Severe vs Non-severe patients        | 13                 | 99817           | Not reported | Not reported                   |
| Poly 2021               | To investigate the association between metformin and the risk of mortality among diabetes patients with COVID-19. | Study were included if they: (a) were restricted to epidemiological studies and evaluated the risk of mortality among COVID-19 patients with or with metformin, (b) included at least 15 participants to calculate the effect size, (c) provided clear inclusion and exclusion criteria of COVID-19 patients and metformin exposure. | 06 (2021)           | PubMed, Scopus, Embase, and Web of Science              | Mortality, severity                  | 16                 | Not reported    | Not reported | Europe 5, Asia 5, N. America 6 |

| Study ID          | Review objective as stated by authors                                                                                                                                  | Inclusion criteria as stated by authors                                                                                                                                                                                                                                                                                               | Search month (year) | Databases searched                          | Outcomes reported   | # included studies | # part-icipants | Setting(s)   | Country(s)                       |
|-------------------|------------------------------------------------------------------------------------------------------------------------------------------------------------------------|---------------------------------------------------------------------------------------------------------------------------------------------------------------------------------------------------------------------------------------------------------------------------------------------------------------------------------------|---------------------|---------------------------------------------|---------------------|--------------------|-----------------|--------------|----------------------------------|
| Poly 2021b        | To investigate relevant epidemiological studies for evaluating the association between obesity and mortality of COVID-19 patients.                                     | Articles were included if they (a) were peer-reviewed, (b) were published in English, (c) were cohort or comparison design, (d) included patients with more than 20, (e) and reported effect size as odds ratio (OR), risk ratio (RR) or hazard ratio (HR).                                                                           | 08 (2020)           | Scopus, PubMed, EMBASE, and Web of Science. | Mortality           | 17                 | 543,399         | Not reported | Europe 4, N. America 11, Mixed 1 |
| Prattichizzo 2022 | To explore whether glycaemic control, as measured by HbA1c, is a relevant prognostic factor for acute COVID-19 mortality or worsening of symptoms in patients with DM. | (1) enrolling patients with any form of pre-existing DM and hospitalized for COVID-19 (laboratory confirmed or clinically assigned) and (2) reporting data regarding HbA1c values at hospital admission or before infection in relation to COVID-19 mortality or a composite outcome including mortality with any follow-up duration, | 12 (2020)           | PubMed, Embase and Scopus                   | Mortality, severity | 7                  | 4,985,063       | Not reported | Not reported                     |
| Puri 2022         | To compare comorbidities among severe and non-severe COVID-19 patients in Asian versus non-Asian populations.                                                          | (1) Study population: Studies with patients diagnosed with COVID-19; (2) Comparative studies: Studies that compared severe or ICU (elevated troponin T (TnT) level as the second choice if severe or ICU data were not given) and non-severe or non-ICU (normal TnT level as the second choice if non-severe or non-ICU data was not  | 03 (2021)           | PubMed, Embase, Scopus and Web of Science   | Severity            | 66                 | Not reported    | Not reported | Asia 39, non-Asian 27            |

| Study ID    | Review objective as stated by authors                                                                                                                    | Inclusion criteria as stated by authors                                                                                                                                                                                                                                          | Search month (year) | Databases searched                            | Outcomes reported                                                                                                   | # included studies | # part-icipants | Setting(s)   | Country(s)                                                     |
|-------------|----------------------------------------------------------------------------------------------------------------------------------------------------------|----------------------------------------------------------------------------------------------------------------------------------------------------------------------------------------------------------------------------------------------------------------------------------|---------------------|-----------------------------------------------|---------------------------------------------------------------------------------------------------------------------|--------------------|-----------------|--------------|----------------------------------------------------------------|
|             |                                                                                                                                                          | given) cases of COVID-19; and (3) The studies reporting parameters of comorbidities such as hypertension, diabetes, cardiovascular disease, cancer, chronic obstructive pulmonary disease and chronic kidney disease.                                                            |                     |                                               |                                                                                                                     |                    |                 |              |                                                                |
| Qui 2020    | The current meta-analysis aimed to find risk factors for the COVID-19-related death, helping to enhance the efficacy and reduce the mortality of COVID-1 | 1) The cases in each study were patient diagnosed with COVID-19; 2) Involving the death group or non-survivor group and the survivor group; 3) At least one outcome reported among demographical characteristics, comorbidities and clinical manifestations of COVID-19 deceased | 4 (2020)            | PubMed, Embase, medRxiv and Cochrane Library  | The pooled prevalence of diabetes in COVID-19 death patients                                                        | 15                 | 2401            | Not reported | China, Korea                                                   |
| Radwan 2020 | To determine the association between comorbidities and the severity of the disease among COVID-19 patients.                                              | The inclusion criteria comprised hospitalized patients diagnosed with COVID-19 according to WHO guidance                                                                                                                                                                         | Not reported        | Cochrane, Medline, Trip, and EMBASE databases | severity of COVID-19-related illness namely, intensive care unit (ICU) admission, mechanical ventilation and death. | 7                  | 1885            | Hospital     | China                                                          |
| Rahman 2021 | To estimate the prevalence of all reported symptoms and comorbidities, and then identified the risk factors associated with                              | Clinical investigations or consecutive cases; focused on infected patients; reported at least ten cases and considered all age-groups from any countries                                                                                                                         | 04 (2020)           | PubMed, SCOPUS, EMBASE, WHO, Semantic Scholar | Prevalence                                                                                                          | 29                 | 4884            | Not reported | 5 studies each conducted in USA, India, Spain, and South Korea |

| Study ID     | Review objective as stated by authors                                                                                         | Inclusion criteria as stated by authors                                                                                                                                                                                                                                                                                                                           | Search month (year) | Databases searched                                  | Outcomes reported          | # included studies | # part-icipants | Setting(s)   | Country(s)                                 |
|--------------|-------------------------------------------------------------------------------------------------------------------------------|-------------------------------------------------------------------------------------------------------------------------------------------------------------------------------------------------------------------------------------------------------------------------------------------------------------------------------------------------------------------|---------------------|-----------------------------------------------------|----------------------------|--------------------|-----------------|--------------|--------------------------------------------|
|              | age of COVID-19 infected patients                                                                                             |                                                                                                                                                                                                                                                                                                                                                                   |                     |                                                     |                            |                    |                 |              |                                            |
| Rahman 2021a | To identify some demographic and clinical characteristics which can be appraised as risk factors for the severity of COVID-19 | (a) bivariate data available for the severity (death/ICU (Intensive Care Unit)/severe state/others) of COVID-19 patients, (b) multiple factors available for the severity of the disease, (c) full-text access to the article, (d) information presented in English language, (e) peer-reviewed accepted/published articles                                       | 04 (2020)           | PubMed, Google Scholar, EMBASE and Cochrane Library | Severity                   | 10                 | 2272            | Hospitals    | China                                      |
| Rahmati 2022 | To summarize studies on the prevalence of childhood T1D during COVID-19                                                       | Studies that evaluated pediatrics' new-onset T1D during the COVID-19 pandemic in 2020 and during the same periods in 2019 which have reported at least one of the following outcomes: the number of children with new-onset T1D, the number of DKA among newly diagnosed children with T1D, and the number of severe DKA among newly diagnosed children with T1D. | 03 (2022)           | MEDLINE/PubMed, CINAHL, Scopus, and EMBASE          | Prevalence, severity (DKA) | 26                 | Not reported    | Not reported | Mixed: Europe, Asia, N. America, Australia |
| Rakhmat 2021 | To synthesize evidence on dipeptidyl peptidase-4 (DPP-4) inhibitor and mortality in COVID-19 patients                         | 1) observational studies or randomized controlled trials that reported COVID-19 patients, 2) reporting DPP-4 inhibitor use, 3) mortality, and 4) mortality                                                                                                                                                                                                        | 03 (2021)           | PubMed, Scopus, and Embase                          | Mortality                  | 9                  | 4,477           | Not reported | Not reported                               |

| Study ID         | Review objective as stated by authors                                                                                                                                                                                                                                                                                       | Inclusion criteria as stated by authors                                                                                                                                                                                                                             | Search month (year) | Databases searched                      | Outcomes reported     | # included studies | # participants | Setting(s)   | Country(s)              |
|------------------|-----------------------------------------------------------------------------------------------------------------------------------------------------------------------------------------------------------------------------------------------------------------------------------------------------------------------------|---------------------------------------------------------------------------------------------------------------------------------------------------------------------------------------------------------------------------------------------------------------------|---------------------|-----------------------------------------|-----------------------|--------------------|----------------|--------------|-------------------------|
|                  | and factors affecting it.                                                                                                                                                                                                                                                                                                   | based on DPP-4 inhibitor use.                                                                                                                                                                                                                                       |                     |                                         |                       |                    |                |              |                         |
| Rico-Martin 2021 | To investigate the relationship between metabolic syndrome (MetS) and its components with SARS and mortality in COVID-19 patients                                                                                                                                                                                           | Primary observational longitudinal studies that reported the association between MetS and its components with SARS and/or mortality in COVID-19 patients.                                                                                                           | 09 (2021)           | Web of Science (WOS), Scopus and PubMed | Mortality, severity   | 5                  | >2400          | Not reported | Europe 1, Asia 2, USA 2 |
| Rod 2020         | evaluating the risk factors for covid-19 disease severity with a two-fold purpose: (i) to provide healthcare and public health professionals with a reference list of the consistency of risk factors for covid-19 severity, and (ii) to inform researchers about the consistency of reporting in the available literature. | Do not list inclusion criteria. They state "Articles were selected for the review if they included a comparison between non-severe and CSF cases according to the categorization of severity in each article." CSF = composite outcome of disease severity-fatality | Not reported        | PubMed, Scopus and MedRxiv              | Not reported          | Not reported       | Not reported   | Not reported | Not reported            |
| Roncon 2020      | To assess the risk of ICU admission and mortality risk in diabetic COVID-19 patients.                                                                                                                                                                                                                                       | Not reported                                                                                                                                                                                                                                                        | 3 (2020)            | MEDLINE, Scopus and Web of Science.     | ICU admission, deaths | 8                  | 1382           | Not reported | Not reported            |

| Study ID   | Review objective as stated by authors                                                                                                                                                                 | Inclusion criteria as stated by authors                                                                                                                                                                                                                                                                                          | Search month (year) | Databases searched                                               | Outcomes reported                                                                                                                                                        | # included studies | # part-icipants | Setting(s)   | Country(s)                 |
|------------|-------------------------------------------------------------------------------------------------------------------------------------------------------------------------------------------------------|----------------------------------------------------------------------------------------------------------------------------------------------------------------------------------------------------------------------------------------------------------------------------------------------------------------------------------|---------------------|------------------------------------------------------------------|--------------------------------------------------------------------------------------------------------------------------------------------------------------------------|--------------------|-----------------|--------------|----------------------------|
| Sacks 2020 | (1) To characterise the outcomes of COVID-19 for people with diabetes and (2) add value to current recommendations for healthcare providers and people with diabetes to encourage optimal management. | Recommendations were summarised in addition to expert guidance based on the following topic areas: diabetes specific, general prevention and logistical considerations.                                                                                                                                                          | Not reported        | We undertook a search of PubMed, MEDLINE, EMBASE, Google Scholar | incidence of diabetes in covid; severity of infection in PWD; mortality in PWD; effect of diabetes control on covid-19 disease outcome; consequences of Covid-19 for PWD | Not reported       | Not reported    | Not reported | China, Australia           |
| Saha 2021  | To quantify the prevalence of mortality among (1) diabetic and (2) non-diabetic, and (3) the prevalence of DM, in hospitalized COVID-19 patients.                                                     | Observational, experimental, or case-series studies of hospitalized COVID-19 patients with confirmed disease regardless of age or gender.                                                                                                                                                                                        | 06 (2020)           | PubMed, Embase, and Scopus                                       | Prevalence, mortality                                                                                                                                                    | 22                 | 45,775          | Hospital     | Europe, Asia and USA       |
| Sahni 2021 | To highlight the impact of cardio-metabolic comorbidities on COVID-19 severity and mortality.                                                                                                         | (1) cohort studies, case-control studies and case series studies; (2) the study population included patients with laboratory confirmed SARS-CoV-2 infection; and (3) the primary outcome being reported as fatal or critical case (cases requiring ICU admission or developing ARDS or requiring invasive mechanical ventilatory | 10 (2020)           | Medline (PubMed) and EMBASE                                      | Mortality, severity                                                                                                                                                      | 33                 | 20,475          | Not reported | Europe, Asia (mostly), USA |

| Study ID         | Review objective as stated by authors                                                                                                                                                                    | Inclusion criteria as stated by authors                                                                                                                                                                                                      | Search month (year) | Databases searched                                                               | Outcomes reported                                                                                       | # included studies | # part-icipants | Setting(s)   | Country(s)                                                |
|------------------|----------------------------------------------------------------------------------------------------------------------------------------------------------------------------------------------------------|----------------------------------------------------------------------------------------------------------------------------------------------------------------------------------------------------------------------------------------------|---------------------|----------------------------------------------------------------------------------|---------------------------------------------------------------------------------------------------------|--------------------|-----------------|--------------|-----------------------------------------------------------|
|                  |                                                                                                                                                                                                          | support or cases labelled as “severe COVID” as per local or national classification criteria) versus non-critical case(s) amongst patients with or without various comorbidities.                                                            |                     |                                                                                  |                                                                                                         |                    |                 |              |                                                           |
| Sahu 2021        | To investigate the clinical characteristics that can predict COVID-19 disease severity                                                                                                                   | Studies that focused on individual symptoms and comorbidities of laboratory-confirmed COVID-19 patients and reported the data according to disease severity or ICU admission.                                                                | 05 (2020)           | PubMed, Embase, and Web of Science                                               | Severity                                                                                                | 22                 | 4380            | Not reported | Europe 3, Asia 16, USA 3                                  |
| Saleh 2021       | To investigate the association between diabetes, hypertension, BMI or smoking with the risk of death in patients with COVID-19 and to estimate the proportion of deaths attributable to these conditions | Observational studies (cohort studies and cross-sectional) that reported relative risk estimates (such as (HRs), RR or ORs) with the 95% CIs with or without adjustment for potential confounders                                            | 11 (2020)           | PubMed (MEDLINE), Cochrane library and Embase databases                          | Mortality                                                                                               | 86                 | 1 304 587       | Not reported | Europe 58, Asia 60, N. America 58, S. America 6, Africa 4 |
| Sales-Peres 2020 | This systematic review asked the following questions: (i) “Is obesity associated with higher levels of COVID-19 incidence, prevalence, and                                                               | Our eligibility criteria included case reports, case series, clinical trials, and randomized controlled trials published in English, Portuguese, and Spanish in peer-reviewed journals. The studies must that have addressed epidemiological | 5 (2020)            | MEDLINE, EMBASE, Web of Science, BVS/LILACS, SCI-ELO, SCOPUS, and Google Scholar | Severity - composite outcome (severe COVID infection, ICU admission, mechanical ventilation, mortality) | 9                  | 6577            | Not reported | 3 USA, 2 China, 2 France, 1 Spain, 1 Italy                |

| Study ID      | Review objective as stated by authors                                                                                                                                                                                                                                           | Inclusion criteria as stated by authors                                                                                                                                                                                                 | Search month (year) | Databases searched                                                                               | Outcomes reported                                                               | # included studies | # participants | Setting(s)   | Country(s)        |
|---------------|---------------------------------------------------------------------------------------------------------------------------------------------------------------------------------------------------------------------------------------------------------------------------------|-----------------------------------------------------------------------------------------------------------------------------------------------------------------------------------------------------------------------------------------|---------------------|--------------------------------------------------------------------------------------------------|---------------------------------------------------------------------------------|--------------------|----------------|--------------|-------------------|
|               | risk factors?"; and (ii) "Is obesity associated with higher levels of severe medical complications and does it lead to critical illness and ICU admission?".                                                                                                                    | and clinical features of COVID-19 and its association with obesity.                                                                                                                                                                     |                     |                                                                                                  |                                                                                 |                    |                |              |                   |
| Sanyaolu 2020 | To review these comorbidities, given that most patients with severe COVID-19 cases had comorbidity. Furthermore, we would like to examine specific comorbidities in relation to the COVID-19 disease progression and outcomes based on the literature report since the outbreak | An article was selected if it included keywords such as coronavirus, COVID-19, SARS-CoV-2, clinical features, comorbidity, diabetes, and hypertension. Articles were then reviewed and included based on the applicability to the topic | 4 (2020)            | PubMed, Google Scholar, EBSCOhost, Mendeley and Medline Plus                                     | Reporting from other meta-analysis: Prevalence of Diabetes in COVID-19 patients | Not reported       | Not reported   | Not reported | Not reported      |
| Sathish 2020  | We performed a systematic review and meta- analysis to examine the proportion of newly diagnosed diabetes in COVID-19 patients.                                                                                                                                                 | Observational studies providing data on the number or proportion of COVID-19 patients (laboratory-confirmed or clinically diagnosed) with newly diagnosed diabetes                                                                      | 7 (2020)            | PubMed, MEDLINE, Embase, and Scopus databases and preprint servers (medRxiv and Research Square) | Pooled proportion of covid-19 patients with newly diagnosed diabetes            | 8                  | 3711           | Hospital     | China, USA, Italy |
| Sathish 2021  | Is newly diagnosed diabetes as                                                                                                                                                                                                                                                  | Observational studies providing data on the                                                                                                                                                                                             | 11 (2020)           | PubMed, MEDLINE, Embase and Scopus databases and                                                 | Prevalence                                                                      | 6                  | 617            | Hospitals    | Largely China     |



| Study ID         | Review objective as stated by authors                                                                                                                    | Inclusion criteria as stated by authors                                                                                                                                                               | Search month (year) | Databases searched                                                                                      | Outcomes reported                                                                                                       | # included studies                   | # part-icipants | Setting(s)       | Country(s)                           |
|------------------|----------------------------------------------------------------------------------------------------------------------------------------------------------|-------------------------------------------------------------------------------------------------------------------------------------------------------------------------------------------------------|---------------------|---------------------------------------------------------------------------------------------------------|-------------------------------------------------------------------------------------------------------------------------|--------------------------------------|-----------------|------------------|--------------------------------------|
|                  | frequent as preexisting diabetes in COVID-19 patients?                                                                                                   | number or proportion of COVID-19 patients (laboratory confirmed or clinically diagnosed) with newly diagnosed diabetes                                                                                |                     | preprint servers (medRxiv and Research Square)                                                          |                                                                                                                         |                                      |                 |                  |                                      |
| Sayed 2020       | In this review, the possible polymorphisms involved in susceptibility or resistance towards viral entry along with rise of telemedicine are investigated | Not reported                                                                                                                                                                                          | 8 (2020)            | Pubmed, EMBASE                                                                                          | Mortality and morbidity among COVID-19 patients with existing diabetes; deaths in patient with T1D; t1D and deprivation | Not reported                         | Not reported    | Not reported     | China, Europe, USA, Israel, England, |
| Schlesinger 2021 | To identify high-risk phenotypes of diabetes associated with COVID-19 severity and death.                                                                | Studies of any design that reported risk estimates for associations between phenotypes and death and severity of COVID-19 in individuals with diabetes and WHO-defined confirmed SARS-CoV-2 infection | 10 (2020)           | PubMed, Web of Science (www.webofknowledge.com), Epistemonikos and the COVID-19 Research Database (WHO) | Severity of COVID-19                                                                                                    | 22                                   | 17,687          | Largely hospital | Europe 3, Asia 14, N. America 5      |
| Sepandi 2020     | We investigated the possible risk factors of death in patients with COVID-19, and determined the features that may predict mortality.                    | written in English and reporting factors associated with COVID-19 mortality                                                                                                                           | 3 (2020)            | Med-line/PubMed, Scopus, and Google scholar.                                                            | Mortality                                                                                                               | 13 studies (9 reporting on diabetes) | Not reported    | Not reported     | China                                |
| Shafiee 2022     | To compare T1D and T2D in terms of disease severity                                                                                                      | 1) confirmed COVID-19 patients; 2) patients diagnosed with T1D and T2D; 3) studies evaluating outcomes relevant to this                                                                               | 02 (2022)           | Pubmed/MEDLINE, Scopus, Web of Science, Cochrane library, and Clinicaltrials.gov                        | All cause mortality, hospitalization, and ICU admission rates                                                           | 11                                   | 7690415         | Not reported     | Europe 9, USA 2                      |

| Study ID      | Review objective as stated by authors                                                                                                                                                                     | Inclusion criteria as stated by authors                                                                                                                                                                                                                                                                      | Search month (year) | Databases searched                                                                    | Outcomes reported                                               | # included studies    | # part-icipants                      | Setting(s)   | Country(s)              |
|---------------|-----------------------------------------------------------------------------------------------------------------------------------------------------------------------------------------------------------|--------------------------------------------------------------------------------------------------------------------------------------------------------------------------------------------------------------------------------------------------------------------------------------------------------------|---------------------|---------------------------------------------------------------------------------------|-----------------------------------------------------------------|-----------------------|--------------------------------------|--------------|-------------------------|
|               |                                                                                                                                                                                                           | topic; and 4) studies reporting both T1D and T2D infected with SARS-CoV-2.                                                                                                                                                                                                                                   |                     |                                                                                       |                                                                 |                       |                                      |              |                         |
| Shang 2020    | In this study, we aimed to assess whether diabetes mellitus (DM) would increase the risk of severe infection and death inpatients with COVID-19.                                                          | Only those research articles that reported data of DM and at least one outcome of interest were included in this meta-analysis. The primary outcomes were the pooled severe infection and mortality risk in COVID-19 patients with DM.                                                                       | 7 (2020)            | PubMed, Web of Science, MedRxiv and COVID-19 academic research communication platform | Severity, mortality                                             | 76                    | 31067                                | Hospital     | Majority from China     |
| Shoar 2020    | to identify original cohorts comparing data between survivors and non-survivors from COVID-19.                                                                                                            | Original studies in adult patients with COVID-19 comparing the demographics, clinical characteristics, radiologic findings, or laboratory parameters between survivors and non-survivors were eligible for inclusion if available in English language full-text.                                             | Not reported        | PubMed                                                                                | survivor vs non-survivor                                        | 12                    | 3257                                 | Not reported | Wuhan, China            |
| Shrestha 2021 | To analyze the rate of new-onset diabetes in COVID-19 patients and compare their clinical outcomes with those of other COVID-19 patients who had normal or increased blood sugar levels or a pre-existing | (1) Study type(s): Observational studies with a comparison of outcomes among individuals with new onset diabetes, pre-existing diabetes, hyperglycemic and non-diabetics with COVID-19 were included in this review; (2) Study participant(s): Individuals of any age, gender, or nationality diagnosed with | 06 (2020)           | PubMed, PubMed Central, Scopus, Embase, and Google Scholar                            | Mortality, mechanical ventilation/intubation, and ICU admission | 10 (7 included in MA) | Only reported for individual studies | Not reported | Europe 2, Asia 6, USA 2 |

| Study ID       | Review objective as stated by authors                                                                                                                                                | Inclusion criteria as stated by authors                                                                                                                                                                                            | Search month (year) | Databases searched                                        | Outcomes reported                           | # included studies | # participants | Setting(s)                                                                                           | Country(s)                                                       |
|----------------|--------------------------------------------------------------------------------------------------------------------------------------------------------------------------------------|------------------------------------------------------------------------------------------------------------------------------------------------------------------------------------------------------------------------------------|---------------------|-----------------------------------------------------------|---------------------------------------------|--------------------|----------------|------------------------------------------------------------------------------------------------------|------------------------------------------------------------------|
|                | diagnosis of diabetes                                                                                                                                                                | COVID-19 and new-onset DM                                                                                                                                                                                                          |                     |                                                           |                                             |                    |                |                                                                                                      |                                                                  |
| Silverio 2021  | To investigate the burden of cardiovascular risk factors and the rate of fatal outcome in patients infected by SARS-CoV-2, and to explore their relationship during hospitalization. | Observational studies were included if they met the following pre-specified criteria: (I) inclusion of patients hospitalized for COVID-19; (II) data on in-hospital mortality; (III) data on baseline cardiovascular risk factors. | 04 (2020)           | MEDLINE, Cochrane, Web of Science, and SCOPUS             | Occurrence of death during hospitalization. | 45                 | 18,300         | Not reported                                                                                         | Not reported                                                     |
| Singh 2020 (1) | We aimed to evaluate the outcome in hypertensive patients with COVID-19 and its relation to the use of renin-angiotensin system blockers (RASB)                                      | We have retrieved all the available literature published in English language on COVID-19, that reported the outcomes in different co-morbidities                                                                                   | 3 (2020)            | PubMed                                                    | Prevalence of diabetes in COVID-19 patients | Not reported       | Not reported   | Not reported                                                                                         | Not reported                                                     |
| Singh 2020 (2) | This review aims to estimate the prevalence of both cardiometabolic and other co-morbidities in patients with COVID-19 infection, and to estimate the increased risk of severity and | We retrieved all studies conducted in patients with COVID-19 that explicitly reported the detailed epidemiological characteristics, prevalence of comorbidities, severity of the disease, and in-hospital death outcomes           | 4 (2020)            | Medline, Scopus and the World Health Organisation website | COVID-19 severity, In-hospital mortality    | 18                 | 14558          | 17 studies were based on in-patients, whilst one study used data from infectious diseases registries | 16 were based in China, 1 was from the USA, and 1 was from Italy |

| Study ID       | Review objective as stated by authors                                                                                                                                                                                       | Inclusion criteria as stated by authors                                                                                                                                                      | Search month (year) | Databases searched                                                                                                                            | Outcomes reported                                                                                                                        | # included studies | # participants | Setting(s)   | Country(s)                                       |
|----------------|-----------------------------------------------------------------------------------------------------------------------------------------------------------------------------------------------------------------------------|----------------------------------------------------------------------------------------------------------------------------------------------------------------------------------------------|---------------------|-----------------------------------------------------------------------------------------------------------------------------------------------|------------------------------------------------------------------------------------------------------------------------------------------|--------------------|----------------|--------------|--------------------------------------------------|
|                | mortality in people with co-morbidities.                                                                                                                                                                                    |                                                                                                                                                                                              |                     |                                                                                                                                               |                                                                                                                                          |                    |                |              |                                                  |
| Singh 2020 (3) | This review aims to collate currently available data about diabetes and COVID-19 infection. It specifically looks at the relation between diabetes and COVID-19 in terms of epidemiology, pathophysiology and therapeutics. | Not reported                                                                                                                                                                                 | 4 (2020)            | PubMed database and Google Scholar                                                                                                            | Association of diabetes in COVID-19 patients, morbidity and mortality                                                                    | Not reported       | Not reported   | Not reported | Not reported                                     |
| Singhal 2021   | To comprehensively describe the clinical presentation, co-morbidities, severity of disease and outcomes in older adults infected with COVID-19.                                                                             | Observational studies that included older patients ( $\geq$ 60 years) with confirmed COVID-19 infection and reported comorbidities, clinical characteristics, severity of illness or outcome | 05 (2020)           | PubMed and Scopus                                                                                                                             | Severity of illness defined as specified in included studies) and outcomes (death, discharge) in older patients with COVID-19 infection. | 46                 | 13624          | Not reported | Europe 5, Asia 30, USA 8, Mixed 2, Cruise ship 1 |
| Ssentongo 2020 | estimated the association of major pre-existing chronic conditions, including cardiovascular diseases,                                                                                                                      | 1. studies involving patients hospitalized for COVID-19, regardless of age. 2.Exposure: any of the 11 comorbidities 3.Comparison: Hospitalized patients with COVID-19 without the above      | 7 (2020)            | PubMed (MEDLINE), OVID (MEDLINE, HEALTHSTAR), SCOPUS, Joana Briggs International EBP, Cochrane Library databases, Google Scholar and Medrxiv. | Mortality                                                                                                                                | 25 studies         | 65484          | Hospital     | 21/25 from China                                 |

| Study ID         | Review objective as stated by authors                                                                                                                                                                                                   | Inclusion criteria as stated by authors                                                                                                                                                 | Search month (year) | Databases searched                             | Outcomes reported                                                                   | # included studies | # part-icipants | Setting(s)   | Country(s)              |
|------------------|-----------------------------------------------------------------------------------------------------------------------------------------------------------------------------------------------------------------------------------------|-----------------------------------------------------------------------------------------------------------------------------------------------------------------------------------------|---------------------|------------------------------------------------|-------------------------------------------------------------------------------------|--------------------|-----------------|--------------|-------------------------|
|                  | hypertension, diabetes, congestive heart failure, cerebrovascular disease, chronic kidney disease, chronic liver disease, cancer, chronic obstructive pulmonary disease, asthma, and HIV/AIDS, and the risk of mortality from COVID-19. | mentioned pre-existing comorbidities 4. The primary outcome was the mortality in hospitalized patients with COVID-19 5. randomized controlled trials, cohort, and case-control studies. |                     |                                                |                                                                                     |                    |                 |              |                         |
| Subramaniam 2021 | To investigate the incidence, characteristics and outcomes of patients who were readmitted to hospital emergency departments or required rehospitalisation following an index hospitalisation with a diagnosis of COVID-19              | Studies reporting on the incidence, characteristics and outcomes of consecutive patients with COVID-19 who represent or require hospital admission                                      | 12 (2020)           | PubMed, EMBASE, MedRxiv, and BioRxiv           | Readmission                                                                         | 6                  | 547             | Hospitals    | Europe 3, Asia 1, USA 2 |
| Tadic 2020       | The aim of this review article was to summarize the current knowledge about the                                                                                                                                                         | Not reported                                                                                                                                                                            | 4 (2020)            | PubMed, Scopus, Web of Science, Google Scholar | narrative report of prevalence and mortality of people with DM in covid19 patients, | Not reported       | Not reported    | Not reported | China                   |

| Study ID    | Review objective as stated by authors                                                                                                                                                                                         | Inclusion criteria as stated by authors                                                                                                                                                                                                                                                                                                                                                                                                              | Search month (year) | Databases searched                                                                                                        | Outcomes reported                                                                             | # included studies               | # participants | Setting(s)         | Country(s)                                                                                                                                      |
|-------------|-------------------------------------------------------------------------------------------------------------------------------------------------------------------------------------------------------------------------------|------------------------------------------------------------------------------------------------------------------------------------------------------------------------------------------------------------------------------------------------------------------------------------------------------------------------------------------------------------------------------------------------------------------------------------------------------|---------------------|---------------------------------------------------------------------------------------------------------------------------|-----------------------------------------------------------------------------------------------|----------------------------------|----------------|--------------------|-------------------------------------------------------------------------------------------------------------------------------------------------|
|             | relationship between diabetes and COVID-19 and its role in outcome in these patients.                                                                                                                                         |                                                                                                                                                                                                                                                                                                                                                                                                                                                      |                     |                                                                                                                           |                                                                                               |                                  |                |                    |                                                                                                                                                 |
| Tan 2020    | The objective of this systematic review and meta-analysis was to provide a contemporary and global assessment of the point estimate of death and risk factors for severe disease in patients admitted to an ICU with COVID-19 | (1) Design that included randomized controlled trials, non-randomized controlled trials(case control or controlled cohort), observational studies and case series, (2) Study population that included adult patients(18 years old) admitted to an ICU or high dependency unit, which included studies that compared ICU and non-ICU cohorts (3) Disease that confirmed COVID-19 or SARS-CoV-2 (4) Outcome that reported in-hospital mortality rates. | 8 (2020)            | Medline, Embase and Cochrane Library                                                                                      | Prevalence of diabetes in severe COVID-19 patients (i.e. those that were admitted to HDU/ICU) | 35 referenced diabetes mellitus) | 3345           | Hospital (ICU/HDU) | Kuwait, Israel, USA, Spain, Portugal, China, Italy, Greece, France, England, Oman, Netherlands, Switzerland, Canada, Denmark and United Kingdom |
| Taylor 2021 | To determine factors associated with mortality among adults with COVID-19 admitted to intensive care                                                                                                                          | Adult patients with COVID-19 admitted to ICU, reporting mortality or survival outcomes stratified by patient factors, risk scores and haematological results of interest                                                                                                                                                                                                                                                                             | 12 (2020)           | MEDLINE, Embase, the Cochrane Library, Africa-Wide Information via EBSCOhost and SciELO Citation Index via Web of Science | Mortality                                                                                     | 58                               | 44,305         | Hospital/ICU       | Reported in supplementary file - appendix s3                                                                                                    |
| Thakur 2021 | To determine the differences in the prevalence of major comorbidities associated with COVID-19 and the                                                                                                                        | (1) originally published in the English language; (2) included confirmed diagnosis of COVID-19 through laboratory examination; (3) conducted on human patients; (4)                                                                                                                                                                                                                                                                                  | 07 (2020)           | PubMed, Scopus, and EMBASE                                                                                                | Mortality, severity                                                                           | 120                              | 125,446        | Hospital           | Across 19 countries                                                                                                                             |

| Study ID                  | Review objective as stated by authors                                                                                                              | Inclusion criteria as stated by authors                                                                                                                                                                                                  | Search month (year) | Databases searched                                                                                                                                 | Outcomes reported                                                                                                                                                | # included studies | # participants                                                                       | Setting(s)                  | Country(s)   |
|---------------------------|----------------------------------------------------------------------------------------------------------------------------------------------------|------------------------------------------------------------------------------------------------------------------------------------------------------------------------------------------------------------------------------------------|---------------------|----------------------------------------------------------------------------------------------------------------------------------------------------|------------------------------------------------------------------------------------------------------------------------------------------------------------------|--------------------|--------------------------------------------------------------------------------------|-----------------------------|--------------|
|                           | severity and mortality of COVID-19 associated with each of the comorbidities according to the geographical regions.                                | provided information about comorbidities; (5) contained information on the disease outcomes: severity or mortality within comorbidity; and (6) published as an original investigation                                                    |                     |                                                                                                                                                    |                                                                                                                                                                  |                    |                                                                                      |                             |              |
| Tian 2020                 | To conduct a systematic meta-analysis of published articles to comprehensively elucidate predictors of mortality in hospitalized COVID-19 patients | NOT STATED EXPLICITLY ("eligibility criteria" mentioned but not detailed). Studies looking at clinical predictors of mortality in hospitalised COVID-19 patients, with death from COVID-19 as a clear outcome                            | 4 (2020)            | PubMed, Google scholar, Web of Science, and China National Knowledge Infrastructure (CNKI)                                                         | Prevalence of diabetes between mortality vs survival group, associations between mortality from COVID-19 and diabetes i.e. mortality in diabetes vs non-diabetes | 14, 12 used for DM | In total, 4659 patients. 4315 used for DM. 3212 survived of which 682(21.2%) had DM. | Hospitals                   | China        |
| Treskova-Schwarzbach 2021 | To summarise the global evidence on the risk of severe COVID-19 outcomes in patients with pre-existing health conditions                           | SR had to investigate the association between at least one pre-existing health condition, and at least one of the following severe health outcomes due to COVID-19: hospitalisation, admission to ICU, ventilation (intubation) or death | 12 (2020)           | PubMed and Embase (including Medline), supplemented by hand searches on ArRxiv, BioRxiv, ChemRxiv, MedRxiv, Preprints.org, ResearchSquare and SSRN | Hospitalisation, admission to ICU, ventilation (intubation) or death                                                                                             | 160                | Not reported                                                                         | Not reported                | Not reported |
| Vardavas 2022             | To investigate the role of underlying medical conditions as prognostic factors for adverse outcomes due to severe acute                            | Only cohort studies conducted in Europe, including EU/EEA countries provided 1) they evaluated patients with clinically diagnosed or laboratory-confirmed COVID-19 in one                                                                | 06 (2021)           | Medline (Ovid) and Embase (Ovid)                                                                                                                   | Mortality, severity, hospitalisations, ICU admission                                                                                                             | 88                 | 6 653 207                                                                            | Community, hospital and ICU | Europe       |

| Study ID        | Review objective as stated by authors                                                                                                                         | Inclusion criteria as stated by authors                                                                                                                                                    | Search month (year) | Databases searched                                                                 | Outcomes reported                                                                                                                                                                                                   | # included studies                                                        | # participants                                                                                               | Setting(s)   | Country(s)                               |
|-----------------|---------------------------------------------------------------------------------------------------------------------------------------------------------------|--------------------------------------------------------------------------------------------------------------------------------------------------------------------------------------------|---------------------|------------------------------------------------------------------------------------|---------------------------------------------------------------------------------------------------------------------------------------------------------------------------------------------------------------------|---------------------------------------------------------------------------|--------------------------------------------------------------------------------------------------------------|--------------|------------------------------------------|
|                 | respiratory syndrome coronavirus 2 (SARS-CoV-2)                                                                                                               | of three settings (community, hospital or ICU) and 2) they assessed the associations between underlying clinical conditions (as risk factors) and primary adverse outcomes of COVID-19     |                     |                                                                                    |                                                                                                                                                                                                                     |                                                                           |                                                                                                              |              |                                          |
| Varikasuvu 2020 | We aim to evaluate the risk of disease severity and mortality in association with diabetes in COVID-19 patients.                                              | Studies reporting diabetic proportions in sub- groups of COVID-19 patients (Severe vs. Non-severe & Mortal vs. Survival) were included.                                                    | 5                   | Pubmed, Cochrane, medRxiv, "other databases"                                       | Severity and mortality                                                                                                                                                                                              | 47                                                                        | PWD 1009/3773 and 1360/9495 in severe/mortal and non-severe/survival groups of COVID-19 cases, respectively. | Not reported | Majority China; also Italy, France, USA, |
| Venkata 2020    | Not reported                                                                                                                                                  | Not reported                                                                                                                                                                               | Not reported        | PubMed, Embase, and Google Scholar                                                 | Prevalence                                                                                                                                                                                                          | 22 studies                                                                | >11,000                                                                                                      | Hospital     | 8 countries                              |
| Wang 2020 (1)   | We performed a systematic review and meta-analysis in order to identify risk factors associated with the severity and mortality rate among COVID-19 patients. | (1) The study was a clinical observation in humans; (2) the study included COVID-19 patient information; and (3) the study included information regarding comorbidity and/or organ injury. | 4 (2020)            | PubMed, Embase, Web of Science, medRxiv, and bioRxiv                               | Clinical characteristics associated with increased disease severity and mortality among patients with COVID-19; the association between preexisting diabetes and COVID-19 severity i.e. diabetics vs non-diabetics. | 34, 31 used for DM (counted from figure 6)                                | A total of 6,263 COVID-19 cases                                                                              | Not reported | China                                    |
| Wang 2020 (2)   | We performed a meta-analysis of the available studies to explore relationship between                                                                         | (1) Types of Studies: published studies reported the relationship between comorbidity and patients with COVID-19; (2) Subjects: diagnosed                                                  | 3 (2020)            | PubMed (Medline), EMBASE, Springer, Web of Science, and Cochrane Library databases | Association between diabetes in COVID patients and severe disease (severity sub-grouped into ICU admission and clinical                                                                                             | 6, 6 used for DM. 2 studies used whether patients experienced ICU care to | For DM, 324 severe group cases and 1234 non-severe group cases (1558 in total)                               | Not reported | China                                    |



| Study ID       | Review objective as stated by authors                                                                             | Inclusion criteria as stated by authors                                                                                                                                                                                                                                                                                                                               | Search month (year) | Databases searched                                             | Outcomes reported                                                        | # included studies                                                                                                      | # part-icipants | Setting(s)   | Country(s)               |
|----------------|-------------------------------------------------------------------------------------------------------------------|-----------------------------------------------------------------------------------------------------------------------------------------------------------------------------------------------------------------------------------------------------------------------------------------------------------------------------------------------------------------------|---------------------|----------------------------------------------------------------|--------------------------------------------------------------------------|-------------------------------------------------------------------------------------------------------------------------|-----------------|--------------|--------------------------|
|                | comorbidity and patients with COVID-19.                                                                           | patients with COVID-19; (3) Exposure intervention: COVID-19 patients with comorbidity included: hypertension, diabetes, chronic obstructive pulmonary disease (COPD), liver disease, malignancy, renal disease, cardiovascular disease, cerebrovascular disease; (4) Outcome indicator: the odds ratios (OR) with 95% confidence intervals (CI) for each comorbidity. |                     |                                                                | symptoms). Diabetes vs non-diabetes.                                     | judge the severity of the disease, and the other 4 studies used clinical symptoms to judge the severity of the disease. |                 |              |                          |
| Wang 2020 (3)  | The aim of this research was to systematically assess the prevalence of diabetes mellitus among 2019-nCoV.        | The inclusion criteria were as follows: (1) the studies were published in English; (2) 2019-nCoV diagnosed depending on World Health Organization interim guidance; (3) those were clinical studies; (4) clinical information can be collected from the articles.                                                                                                     | 2 (2020)            | PubMed, Embase, Web of Science, and Medline                    | Prevalence of diabetes overall and in moderate and severe COVID patients | 9                                                                                                                       | 2007            | Not reported | China                    |
| Wang 2022      | To review observational studies on the effect of insulin use and mortality in patients with COVID-19 and diabetes | Patients confirmed to have or were clinically diagnosed with COVID-19 and diabetes, and data regarding the risk of death between insulin and noninsulin users were available                                                                                                                                                                                          | 12 (2020)           | PubMed, EMBASE, Medline, and Cochrane Library databases        | Mortality                                                                | 6                                                                                                                       | 1338            | Not reported | Europe 3, China 2, USA 1 |
| Wicaksana 2020 | This article aims to review the current evidence on diabetes                                                      | We conducted a scoping review in PubMed, Science Direct, DOAJ and Microsoft Academics databases from                                                                                                                                                                                                                                                                  | 4 (2020)            | PubMed, Science Direct, DOAJ and Microsoft Academics databases | ICU admission, mortality                                                 | 7                                                                                                                       | Not reported    | Not reported | Not reported             |

| Study ID   | Review objective as stated by authors                                                                                                                                                                                                                             | Inclusion criteria as stated by authors                                                                                                                                                                                                                                                                                                                                                         | Search month (year) | Databases searched                                                                                           | Outcomes reported | # included studies | # part-icipants | Setting(s)   | Country(s)                        |
|------------|-------------------------------------------------------------------------------------------------------------------------------------------------------------------------------------------------------------------------------------------------------------------|-------------------------------------------------------------------------------------------------------------------------------------------------------------------------------------------------------------------------------------------------------------------------------------------------------------------------------------------------------------------------------------------------|---------------------|--------------------------------------------------------------------------------------------------------------|-------------------|--------------------|-----------------|--------------|-----------------------------------|
|            | management and specific considerations during the COVID-19 pandemic for people living with diabetes.                                                                                                                                                              | January 1 to April 17, 2020. Searching terms included "COVID-19", "severe acute respiratory syndrome coronavirus 2", and "Diabetes Mellitus" were used. Only scientific articles discussing diabetes management and specific considerations were selected and extracted.                                                                                                                        |                     |                                                                                                              |                   |                    |                 |              |                                   |
| Wu 2020    | This meta-analysis first aims to explore the possible clinical mortality between diabetes and COVID-19, analyse if diabetes patients infected with SARS-CoV-2 are exposed to the worst clinical prognostic risk, and to evaluate the reliability of the evidence. | Primitive studies were carefully examined, and there were no nation restrictions in our study. The inclusion criteria were as follows: (1) all studies reporting data on COVID-19 non-survivors, survivors, and laboratory-confirmed COVID-19 patients; (2) studies limited to mankind, contained original data, published in English and appeared in the form of either abstract or full-text. | 4 (2020)            | Medline via PubMed, EMBASE, and Web of Science                                                               | Mortality         | 9 studies          | 1471            | Hospital     | China                             |
| Wu 2021    | To evaluate the in-hospital mortality and risk factors of death in COVID-19 patients                                                                                                                                                                              | All eligible studies should report the mortality and/or risk factors for death in COVID-19 patients                                                                                                                                                                                                                                                                                             | 05 (2020)           | PubMed, Embase, Cochrane Library, China National Knowledge Infrastructure (CNKI), VIP, and Wanfang databases | Mortality         | 80                 | Not reported    | Hospitals    | Europe 11, Asia 61, N. America 8  |
| Xiang 2021 | To summarize clinical, laboratory,                                                                                                                                                                                                                                | (I) hospitalized patients with confirmed COVID-19; (II) reported                                                                                                                                                                                                                                                                                                                                | 06 (2020)           | PubMed, EMBASE and Cochrane                                                                                  | Mortality         | 20                 | 15408           | Not reported | Europe 4, Asia 13, USA 1, mixed 1 |

| Study ID   | Review objective as stated by authors                                                                                                        | Inclusion criteria as stated by authors                                                                                                                                                                                                                        | Search month (year) | Databases searched                                                                                                                                                                                                                                                      | Outcomes reported                                                                                                                   | # included studies | # part-icipants   | Setting(s)   | Country(s)                 |
|------------|----------------------------------------------------------------------------------------------------------------------------------------------|----------------------------------------------------------------------------------------------------------------------------------------------------------------------------------------------------------------------------------------------------------------|---------------------|-------------------------------------------------------------------------------------------------------------------------------------------------------------------------------------------------------------------------------------------------------------------------|-------------------------------------------------------------------------------------------------------------------------------------|--------------------|-------------------|--------------|----------------------------|
|            | radiological features, and complications of non-survivors with confirmed COVID-19.                                                           | demographical, clinical feature, laboratory values, chest CT findings, treatment or outcomes of survivors and non-survivors respectively; (III) the risk factor of mortality; (IV) cross-sectional studies and (V) article language was English and/or Chinese |                     |                                                                                                                                                                                                                                                                         |                                                                                                                                     |                    |                   |              |                            |
| Xie 2021   | To summarize the characteristics of COVID-19 patients in the early stage of the pandemic and explore the risk factors of disease progression | Studies that reported more than 50 cases of SARS-CoV-2 infection confirmed by real-time reverse transcriptase-polymerase chain reaction (RT-PCR) with demographical, clinical, laboratory, and image characteristics                                           | 03 (2020)           | PubMed, Chinese medical journal network, and CNKI                                                                                                                                                                                                                       | Severity                                                                                                                            | 90                 | 16526             | Not reported | 88 (97.8%) were from China |
| Xu 2020    | To systematically review evidence for the risk factors of COVID-19 patients progressing to critical illness.                                 | (i) Prospective or retrospective original reports; (ii) All of the patients were diagnosed with COVID-19; (iii) Characteristics of severe and mild cases were documented; and (iv) Complete medical records were available for data extraction.                | 3 (2020)            | Chinese and English electronic bibliographic databases, including China National Knowledge Infrastructure (CNKI), Wanfang Database, Weipu Database, Chinese Biomedicine Literature Database (CBM-SinoMed), PubMed, Embase, Cochrane Central Register and Web of Science | Not explicit, but association between diabetes in COVID patients and diseases severity, grouped into severe and non-severe disease. | 20, 10 used for DM | 1083 for diabetes | Not reported | China                      |
| Yanai 2020 | I systematically reviewed a possible association of metabolic syndrome with the                                                              | Not reported                                                                                                                                                                                                                                                   | Not reported        | Not reported                                                                                                                                                                                                                                                            | Severity (undefined)                                                                                                                | 12 studies         | Not reported      | Not reported | Not reported               |

| Study ID      | Review objective as stated by authors                                                                                                                                                                                                 | Inclusion criteria as stated by authors                                                                                                                                                                                                                            | Search month (year) | Databases searched                                                          | Outcomes reported                                                                                                                | # included studies                                                   | # participants                                                                 | Setting(s)   | Country(s)              |
|---------------|---------------------------------------------------------------------------------------------------------------------------------------------------------------------------------------------------------------------------------------|--------------------------------------------------------------------------------------------------------------------------------------------------------------------------------------------------------------------------------------------------------------------|---------------------|-----------------------------------------------------------------------------|----------------------------------------------------------------------------------------------------------------------------------|----------------------------------------------------------------------|--------------------------------------------------------------------------------|--------------|-------------------------|
|               | susceptibility to severe acute respiratory syndrome coronavirus 2 (SARS-CoV-2) infection and severity of COVID-19 by literature search.                                                                                               |                                                                                                                                                                                                                                                                    |                     |                                                                             |                                                                                                                                  |                                                                      |                                                                                |              |                         |
| Yang 2020     | We will provide a systematic evaluation and detail, which will not only estimate the prevalence of comorbidities in all patients, but also assess the risk of underlying diseases in severe patients compared to non-severe patients. | Eligible were those that described the epidemiological, clinical features of COVID-19, and the prevalence of chronic diseases in infected patients".                                                                                                               | 2 (2020)            | PubMed, EMBASE, and Web of Science databases                                | The association between presence of diabetes and severe and non-severe diseaseAlso, prevalence of diabetes in COVID-19 patients. | 7 in total. Between severe group and non-severe group for DM used 4. | 1576 participants in total, of which 9.7% had diabetes in the pooled analysis. | Hospitals    | China                   |
| Yang 2021 (1) | To detect the overall effects of metformin on COVID-19 patients with diabetes                                                                                                                                                         | (1) evaluation on the effect of metformin on COVID-19 patients with diabetes; (2) inclusion of sufficient data or the data can be acquired from the manuscript or supplementary materials to calculate ORs and 95% CIs; and (3) the study was published in English | 06 (2021)           | PubMed, Embase and CNKI (China National Knowledge Infrastructure) databases | Mortality, severity                                                                                                              | 17                                                                   | 20719                                                                          | Not reported | Europe 4, Asia 9, USA 4 |
| Yang 2021 (2) | To determine the association between insulin                                                                                                                                                                                          | (1) population: the subjects were patients with both COVID-19 and diabetes; (2)                                                                                                                                                                                    | 02 (2021)           | PubMed, Cochrane Library, EMBASE and Web of Science                         | Mortality, Severe/Critical Complications                                                                                         | 18                                                                   | 12277                                                                          | Not reported | Europe 6, Asia 7, USA 5 |

| Study ID      | Review objective as stated by authors                                                                                                                                            | Inclusion criteria as stated by authors                                                                                                                                                                                                                                                                                                                                                      | Search month (year) | Databases searched                                                     | Outcomes reported                                                                                    | # included studies | # part-icipants                                         | Setting(s)   | Country(s) |
|---------------|----------------------------------------------------------------------------------------------------------------------------------------------------------------------------------|----------------------------------------------------------------------------------------------------------------------------------------------------------------------------------------------------------------------------------------------------------------------------------------------------------------------------------------------------------------------------------------------|---------------------|------------------------------------------------------------------------|------------------------------------------------------------------------------------------------------|--------------------|---------------------------------------------------------|--------------|------------|
|               | injection and the outcomes of COVID-19                                                                                                                                           | intervention: insulin treatment; (3) comparator/control: the control group involved non-insulin treatment; (4) outcomes refer to the mortality and other complications of COVID-19, and the form of the outcomes must be original data of COVID-19 deaths and complications or calculated adjusted/unadjusted odds ratios (ORs) or risk ratios (RRs); and (5) study design: clinical studies |                     |                                                                        |                                                                                                      |                    |                                                         |              |            |
| Yang 2021 (3) | To systematically describe the relationship between the use of DPP-4is and the mortality of COVID-19                                                                             | (1) they contained information on DPP-4is and the outcomes of COVID-19, including mortality and the development of severe COVID-19; and (2) the subjects were patients with both COVID-19 and T2DM                                                                                                                                                                                           | 10 (2020)           | PubMed, Cochrane Library, EMBASE and Web of Science                    | Mortality                                                                                            | 4                  | 1933                                                    | Not reported | Europe     |
| Yifan 2020    | We have systematically reviewed the single-centre or multicentre observational studies of older patients with COVID-19 and comprehensively dissected the true impact of age as a | Eligibility criteria are as follows: (a) research types: descriptive studies including case-control studies, retrospective cross-sectional studies, cohort studies, and case series; (b) research subjects: patients with laboratory-confirmed COVID-19; (c) studies comparing clinical characteristics, laboratory                                                                          | 8 (2020)            | PubMed, EMBASE, Cochrane Library, Scopus, and Web of Science databases | Association between diabetes in COVID patients and age (adult vs elderly). Diabetes vs non-diabetes. | 4                  | 2047 patients confirmed with COVID-19. 195 had diabetes | Not reported | China      |

| Study ID  | Review objective as stated by authors                                                                                                                                                        | Inclusion criteria as stated by authors                                                                                                                                                                                                                                                                                                                                                                                                                                                                    | Search month (year) | Databases searched                                               | Outcomes reported     | # included studies | # part-icipants | Setting(s)   | Country(s)          |
|-----------|----------------------------------------------------------------------------------------------------------------------------------------------------------------------------------------------|------------------------------------------------------------------------------------------------------------------------------------------------------------------------------------------------------------------------------------------------------------------------------------------------------------------------------------------------------------------------------------------------------------------------------------------------------------------------------------------------------------|---------------------|------------------------------------------------------------------|-----------------------|--------------------|-----------------|--------------|---------------------|
|           | complex variable on COVID-19 disease.                                                                                                                                                        | findings, and outcomes for the elderly and young.                                                                                                                                                                                                                                                                                                                                                                                                                                                          |                     |                                                                  |                       |                    |                 |              |                     |
| Yin 2021  | To assess the role of comorbidity in COVID-19 progression                                                                                                                                    | (1) Designed studies published online. (2) Studies contained well-recorded clinical characteristics and epidemiological information of patients diagnosed with COVID-19, including age, gender, symptoms, date of hospitalization, and comorbidities. (3) Participants in the study must be stratified into different groups according to severity or disease progression, in the form of either mild/ moderate/ severe/critical illness based on clinical symptoms or ICU/non-ICU based on admission care | 01 (2021)           | PubMed and Web of Science, and the Chinese database CNKI         | Prevalence            | 41                 | 12,526          | Not reported | China               |
| Zaki 2020 | To undertake a review and critical appraisal of published/preprint reports that offer methods of determining the effects of hypertension, diabetes, stroke, cancer, kidney issues, and high- | Not reported                                                                                                                                                                                                                                                                                                                                                                                                                                                                                               | Not reported        | COVID-19 Open Research Dataset (CORD-19), PubMed, Google Scholar | Prevalence, mortality | 11 on diabetes     | Not reported    | Hospital     | Majority from China |

| Study ID          | Review objective as stated by authors                                                                                                                                                                                              | Inclusion criteria as stated by authors                                                                                                                                                                                                                | Search month (year) | Databases searched                                                                               | Outcomes reported                                                                          | # included studies                        | # part-icipants                                      | Setting(s)           | Country(s)                     |
|-------------------|------------------------------------------------------------------------------------------------------------------------------------------------------------------------------------------------------------------------------------|--------------------------------------------------------------------------------------------------------------------------------------------------------------------------------------------------------------------------------------------------------|---------------------|--------------------------------------------------------------------------------------------------|--------------------------------------------------------------------------------------------|-------------------------------------------|------------------------------------------------------|----------------------|--------------------------------|
|                   | cholesterol on COVID-19 disease severity.                                                                                                                                                                                          |                                                                                                                                                                                                                                                        |                     |                                                                                                  |                                                                                            |                                           |                                                      |                      |                                |
| Zangiabadian 2021 | To summarize the available evidence on the potential mechanism of action and the efficacy of metformin in COVID-19 patients with DM                                                                                                | Not reported                                                                                                                                                                                                                                           | 07 (2020)           | PubMed/Medline, EMBASE, the Cochrane Controlled Register of Trials (CENTRAL), and Web of Science | duration of hospitalization, the effect on in-hospital death, and effect on poor prognosis | 14 - 3 on effect of metformin on outcomes | Not reported - 3 studies reported 6,659 participants | Not reported         | Not reported                   |
| Zein 2022         | To synthesize the latest evidence on the effect of dipeptidyl peptidase-4 (DPP-IV) inhibitor in patients with COVID-19                                                                                                             | prospective or retrospective observational studies or case series or randomized controlled trials (RCTs) reporting DPP-IV inhibitor use in patients with COVID-19 and mortality                                                                        | 07 (2021)           | PubMed, Scopus, Embase, and Clinicaltrials.gov                                                   | Mortality                                                                                  | 11                                        | 5950                                                 | Not reported         | Europe 7, Asia 3, N. America 1 |
| Zeng-HongWu 2021  | To explore the possible clinical mortality between diabetes and COVID-19, analyze if diabetes patients infected with SARS-CoV-2 are exposed to the worst clinical prognostic risk, and to evaluate the reliability of the evidence | (1) all studies reporting data on COVID-19 nonsurvivors, survivors, and laboratory-confirmed COVID-19 patients; (2) studies limited to mankind, contained original data, published in English and appeared in the form of either abstract or full-text | 04 (2020)           | Medline via PubMed, EMBASE, and Web of Science                                                   | Mortality                                                                                  | 9                                         | 926                                                  | ICU, isolation wards | China                          |
| Zhao 2020 (1)     | The aim of our study is to perform a                                                                                                                                                                                               | Inclusion criteria were as follows: (1) any study that gives information about the                                                                                                                                                                     | 2                   | PubMed, Embase, Cochrane, the Web of Science Core Collection (Clarivate                          | Severity, mortality                                                                        | 30 studies overall (10                    | 53,000 (2511 relevant for diabetes)                  | Not reported         | Majority from China            |

| Study ID      | Review objective as stated by authors                                                                                                                                                                                                                                                                                                 | Inclusion criteria as stated by authors                                                                                                                                                                                                                      | Search month (year) | Databases searched                | Outcomes reported                                                                           | # included studies     | # part-icipants | Setting(s)                                | Country(s)   |
|---------------|---------------------------------------------------------------------------------------------------------------------------------------------------------------------------------------------------------------------------------------------------------------------------------------------------------------------------------------|--------------------------------------------------------------------------------------------------------------------------------------------------------------------------------------------------------------------------------------------------------------|---------------------|-----------------------------------|---------------------------------------------------------------------------------------------|------------------------|-----------------|-------------------------------------------|--------------|
|               | systematic review and meta-analysis of clinical characteristics to explore the risk factors of COVID-19-associated severe illness and death, and first time to compare the differences of those predictors between COVID-19, SARS and MERS.                                                                                           | clinical characteristics or demographic or outcome of the infectious disease, (2) restriction language to English only, and (3) studies that allowed us to stratify the risk of severe or fatal COVID-19 by demographic or medical condition were preferred. |                     | Analytics), and MedRxiv databases |                                                                                             | relevant for diabetes) |                 |                                           |              |
| Zhao 2020 (2) | This study aimed to compare the epidemiological and clinical features between ICU patients and non-ICU patients in order to find the risk factors for exacerbation prediction of Novel Coronavirus Infected Pneumonia (NICP) patients, which was very valuable to identify the development, treatment and prognosis of NCIP patients. | (i) patients were diagnosed with NCIP; (ii) study design was the cohort study comparing ICU patients with non-ICU patients.                                                                                                                                  | 2                   | PubMed, Embase and Google scholar | Association between diabetes in COVID patients and ICU admission. Diabetes vs non-diabetes. | 2 studies              | 179             | 1 from a single centre, 1 from a hospital | Wuhan, China |



| Study ID      | Review objective as stated by authors                                                                                                                                                                                                                                                                                                                                                         | Inclusion criteria as stated by authors                                                                                                                                                                                                                                                                                                                                                                                                                                                                                   | Search month (year) | Databases searched                       | Outcomes reported                                                                       | # included studies                                                         | # part-icipants                                                                                  | Setting(s)   | Country(s)            |
|---------------|-----------------------------------------------------------------------------------------------------------------------------------------------------------------------------------------------------------------------------------------------------------------------------------------------------------------------------------------------------------------------------------------------|---------------------------------------------------------------------------------------------------------------------------------------------------------------------------------------------------------------------------------------------------------------------------------------------------------------------------------------------------------------------------------------------------------------------------------------------------------------------------------------------------------------------------|---------------------|------------------------------------------|-----------------------------------------------------------------------------------------|----------------------------------------------------------------------------|--------------------------------------------------------------------------------------------------|--------------|-----------------------|
| Zheng 2020    | analysed the clinical characteristics of COVID-19 patients with critical/mortal illness and non-critical illness in 13 literatures with 3027 patients, to identify the risk factors for COVID-19 patients to develop critical disease or death, in order to effectively predict the progression of the disease, make early treatment response and allocate medical resources in a better way. | (1) groups involving critical illness or death and non-critical illness; (2) patients should be confirmed to have been infected by 2019 novel coronavirus; (3) study designs included randomized controlled trials, nonrandomized controlled trials, case-control studies, cohort studies, cross-sectional studies, and also case reports; (4) at least one outcome reported among demographical characteristics, comorbidities, clinical manifestations or laboratory examinations; (5) study sample was larger than 20. | 3                   | Pubmed, Embase, Web of Science, and CNKI | Association between diabetes in COVID patients and critical/mortal patients             | 13 studies, 11 for DM                                                      | A total number of 3027 patients. Of those with diabetes - 460 critical/mortal, 2119 non-critical | Not reported | China                 |
| Zhou 2020 (1) | We conducted this meta-analysis to provide a comprehensive understanding of the characteristics of COVID-19-related deaths and compare them with those of survivors to enable better investigations of                                                                                                                                                                                        | (1) patients should be confirmed to have been infected with SARS-CoV-2; (2) each study should consist of a death group; (3) the full text of each article should be available; and (4) at least one outcome was reported among demographical characteristics, comorbidities, clinical characteristics, laboratory                                                                                                                                                                                                         | 8                   | PubMed, EMBASE, CNKI                     | Association between diabetes in COVID patients and mortality. Diabetes vs non-diabetes. | 19, of which 18 were included in the diabetes pooling - 6 China, 12 other. | Not reported                                                                                     | Not reported | Asia, Europe, America |

| Study ID      | Review objective as stated by authors                                                                                                                                                         | Inclusion criteria as stated by authors                                                                                                                                                                                                                                        | Search month (year) | Databases searched                                                                                                                                                                                    | Outcomes reported                                                                                      | # included studies                                                                                    | # part-icipants | Setting(s)   | Country(s)                                                                    |
|---------------|-----------------------------------------------------------------------------------------------------------------------------------------------------------------------------------------------|--------------------------------------------------------------------------------------------------------------------------------------------------------------------------------------------------------------------------------------------------------------------------------|---------------------|-------------------------------------------------------------------------------------------------------------------------------------------------------------------------------------------------------|--------------------------------------------------------------------------------------------------------|-------------------------------------------------------------------------------------------------------|-----------------|--------------|-------------------------------------------------------------------------------|
|               | the prognostic factors of COVID-19 in infected individuals.                                                                                                                                   | examinations, or image examinations                                                                                                                                                                                                                                            |                     |                                                                                                                                                                                                       |                                                                                                        |                                                                                                       |                 |              |                                                                               |
| Zhou 2020 (2) | The aim of this study was to integrate recent advances and present an updated meta-analysis of the relationships between comorbidities and severe or fatal outcomes associated with COVID-19. | (1) published studies reporting the relationship between comorbidities and patients with COVID-19 written in English; and (2) the inclusion of data on the prevalence of comorbidities in COVID-19 patients who had severe manifestations, or were admitted to an ICU, or died | 4                   | PubMed, Embase, and Cochrane Library databases                                                                                                                                                        | The primary outcome measure was overall prevalence of comorbidities in severe or fatal COVID-19 and to | 34. 25 used for diabetes, 17 with clinical symptoms as outcome, 4 with ICU admission and 4 with death | 16110           | Not reported | China, the USA, the UK, Italy, France, Spain, Australia, Singapore, and Korea |
| Zhu 2021      | To estimate if higher HbA1c levels are associated with adverse prognosis of COVID-19 patients                                                                                                 | (a) peer-reviewed prospective or retrospective original reports; (b) all patients were diagnosed as COVID-19; (c) outcome indicators were adverse prognosis (fatal and/or critical outcomes).                                                                                  | 11 (2020)           | Wanfang Database, China National Knowledge Infrastructure (CNKI), Chinese Biomedicine Literature Database (CBM-SinoMed), Weipu Database, Embase, Cochrane Central Register, PubMed and Web of Science | fatal and/or critical outcomes                                                                         | 9                                                                                                     | 2577            | Not reported | Europe 3, USA 2, Asia 4                                                       |

1 18 citations are not listed in the above table. This includes 16 reviews which were borderline for inclusion, as they did not contain any meta-analyses on the main outcomes for this review and did not have data on our subgroups of interest (Abdelhafiz 2021; Boden 2022; Huang 2021; Justino 2022; Khanal 2022; Leretter 2022; Mason 2021; Nassar 2021; Nikoloski 2021; Pandey 2022; Pellicori 2021; Peterfi 2022; Pizuorno 2021; Tisminesky 2022; Wingert 2021; Yin 2021). All relevant content in these reviews was consistent with findings from our other included reviews. A further two umbrella reviews are synthesised narratively in the text.

Table 3. Summary of AMSTAR-2 judgements by domain<sup>2</sup>

| Domain                                                                                        | No  | Partial yes | Yes |
|-----------------------------------------------------------------------------------------------|-----|-------------|-----|
| Protocol registered in advance (item 2)                                                       | 147 | 8           | 48  |
| Adequacy of search (item 4)                                                                   | 18  | 137         | 49  |
| Justification for excluding individual studies (item 7)                                       | 169 | 11          | 24  |
| Risk of bias from individual studies being included in the review (item 9)                    | 75  | 48          | 81  |
| Appropriateness of meta-analytical methods (item 11) (Note, 26 did not conduct meta-analysis) | 11  | 65          | 101 |
| Consideration of risk of bias when interpreting the results of the review (item 13)           | 119 | 42          | 43  |
| Assessment of presence and likely impact of publication bias (item 15)                        | 81  | 37          | 86  |

Table 4. AMSTAR-2 critical domain judgements for included reviews

|                       | Protocol registered before commencement of the review (item 2) | Adequacy of the literature search (item 4) | Justification for excluding individual studies (item 7) | Risk of bias from individual studies being included in the review (item 9) | Appropriateness of meta-analytical methods (item 11) | Consideration of risk of bias when interpreting the results of the review (item 13) | Assessment of presence and likely impact of publication bias (item 15) | Total yes/ partial yes |
|-----------------------|----------------------------------------------------------------|--------------------------------------------|---------------------------------------------------------|----------------------------------------------------------------------------|------------------------------------------------------|-------------------------------------------------------------------------------------|------------------------------------------------------------------------|------------------------|
| Abdi 2020             | Yes                                                            | Yes                                        | No                                                      | No                                                                         | Partial yes                                          | No                                                                                  | Yes                                                                    | 4                      |
| Aggarwal 2020         | No                                                             | Partial yes                                | No                                                      | No                                                                         | Partial yes                                          | No                                                                                  | No                                                                     | 2                      |
| Akbari 2022           | No                                                             | Partial yes                                | No                                                      | Partial yes                                                                | Partial yes                                          | Partial yes                                                                         | Partial yes                                                            | 5                      |
| Aktar 2021            | No                                                             | Partial yes                                | No                                                      | No                                                                         | Partial yes                                          | No                                                                                  | Partial yes                                                            | 3                      |
| Alhumaid 2021         | No                                                             | Partial yes                                | No                                                      | Partial yes                                                                | No                                                   | Partial yes                                                                         | No                                                                     | 3                      |
| AlirezaAbdi 2021      | Partial yes                                                    | Partial yes                                | No                                                      | Partial yes                                                                | Partial yes                                          | No                                                                                  | Partial yes                                                            | 5                      |
| Alves 2021            | Partial yes                                                    | Partial yes                                | No                                                      | No                                                                         | Partial yes                                          | No                                                                                  | No                                                                     | 3                      |
| Apicella 2020         | No                                                             | Yes                                        | No                                                      | No                                                                         | n/a                                                  | No                                                                                  | No                                                                     | 1                      |
| Ashktorab 2021        | No                                                             | Partial yes                                | No                                                      | No                                                                         | No                                                   | No                                                                                  | No                                                                     | 1                      |
| Awortwe 2020          | No                                                             | Partial yes                                | No                                                      | No                                                                         | Partial yes                                          | No                                                                                  | Yes                                                                    | 3                      |
| Badawi 2021           | No                                                             | No                                         | No                                                      | No                                                                         | Partial yes                                          | No                                                                                  | Partial yes                                                            | 2                      |
| Bae 2021              | Yes                                                            | Partial yes                                | No                                                      | Yes                                                                        | Partial yes                                          | No                                                                                  | No                                                                     | 4                      |
| Bajgain 2020          | No                                                             | Partial yes                                | No                                                      | Yes                                                                        | No                                                   | No                                                                                  | No                                                                     | 2                      |
| Baradaran 2020        | No                                                             | Partial yes                                | No                                                      | No                                                                         | Partial yes                                          | No                                                                                  | No                                                                     | 2                      |
| Barrera 2020          | Yes                                                            | Yes                                        | No                                                      | Yes                                                                        | Yes                                                  | Yes                                                                                 | No                                                                     | 5                      |
| Bennett 2020          | No                                                             | Partial yes                                | No                                                      | Yes                                                                        | No                                                   | No                                                                                  | No                                                                     | 2                      |
| Bepouka 2022          | No                                                             | Partial yes                                | No                                                      | Partial yes                                                                | Partial yes                                          | No                                                                                  | Partial yes                                                            | 4                      |
| Boddu 2020            | No                                                             | Partial yes                                | No                                                      | No                                                                         | n/a                                                  | No                                                                                  | No                                                                     | 1                      |
| Bonora 2021           | No                                                             | Partial yes                                | No                                                      | No                                                                         | Partial yes                                          | No                                                                                  | No                                                                     | 2                      |
| Bradley 2022          | No                                                             | Partial yes                                | No                                                      | No                                                                         | Partial yes                                          | No                                                                                  | No                                                                     | 2                      |
| Carrasco-Sanchez 2022 | No                                                             | No                                         | No                                                      | Partial yes                                                                | No MA                                                | Partial yes                                                                         | No                                                                     | 2                      |

<sup>2</sup> Assessed as per standard AMSTAR-2 guidance set out in Shea 2017. 18 citations are not listed in the above table. This includes 16 reviews which were borderline for inclusion, as they did not contain any meta-analyses on the main outcomes for this review and did not have data on our subgroups of interest (Abdelhafiz 2021; Boden 2022; Huang 2021; Justino 2022; Khanal 2022; Leretter 2022; Mason 2021; Nassar 2021; Nikoloski 2021; Pandey 2022; Pellicori 2021; Peterfi 2022; Pizuorno 2021; Tisminesky 2022; Wingert 2021; Yin 2021) and the two umbrella reviews.

| Total yes/ partial yes | Assessment of presence and likely impact of publication bias (item 15) | Consideration of risk of bias when interpreting the results of the review (item 13) | Appropriateness of meta-analytical methods (item 11) | Risk of bias from individual studies being included in the review (item 9) | Justification for excluding individual studies (item 7) | Adequacy of the literature search (item 4) | Protocol registered before commencement of the review (item 2) |                                 |
|------------------------|------------------------------------------------------------------------|-------------------------------------------------------------------------------------|------------------------------------------------------|----------------------------------------------------------------------------|---------------------------------------------------------|--------------------------------------------|----------------------------------------------------------------|---------------------------------|
| 3                      | Partial yes                                                            | No                                                                                  | Partial yes                                          | No                                                                         | No                                                      | Partial yes                                | No                                                             | Chamorro-Pareja 2020 (abstract) |
| 3                      | No                                                                     | No                                                                                  | Yes                                                  | Yes                                                                        | No                                                      | Yes                                        | No                                                             | Chen 2020                       |
| 4                      | No                                                                     | No                                                                                  | Partial yes                                          | Partial yes                                                                | No                                                      | Partial yes                                | Yes                                                            | Chen 2022                       |
| 6                      | Partial yes                                                            | Partial yes                                                                         | Partial yes                                          | Partial yes                                                                | No                                                      | Partial yes                                | Yes                                                            | Chen 2022                       |
| 5                      | Partial yes                                                            | Partial yes                                                                         | Partial yes                                          | Partial yes                                                                | No                                                      | Partial yes                                | No                                                             | Cheng 2021                      |
| 3                      | yes                                                                    | No                                                                                  | no                                                   | Yes                                                                        | No                                                      | Partial yes                                | no                                                             | Chidambaram 2020                |
| 3                      | No                                                                     | No                                                                                  | Partial yes                                          | Partial yes                                                                | No                                                      | Partial yes                                | No                                                             | Choi 2022                       |
| 0                      | No                                                                     | No                                                                                  | n/a                                                  | No                                                                         | No                                                      | No                                         | No                                                             | Chowdhury 2020                  |
| 4                      | Partial yes                                                            | No                                                                                  | Partial yes                                          | Partial yes                                                                | No                                                      | Partial yes                                | No                                                             | Chua 2021                       |
| 6                      | Partial yes                                                            | Partial yes                                                                         | Partial yes                                          | Partial yes                                                                | No                                                      | Partial yes                                | Yes                                                            | Corona 2021                     |
| 1                      | No                                                                     | No                                                                                  | n/a                                                  | No                                                                         | No                                                      | Partial yes                                | no                                                             | Costa 2020                      |
| 1                      | No                                                                     | No                                                                                  | n/a                                                  | No                                                                         | No                                                      | Partial yes                                | No                                                             | d'Annunzio 2020                 |
| 4                      | No                                                                     | No                                                                                  | Partial yes                                          | Partial yes                                                                | No                                                      | Partial yes                                | Yes                                                            | Damayanathi 2021                |
| 4                      | Yes                                                                    | No                                                                                  | Yes                                                  | No                                                                         | No                                                      | Yes                                        | Yes                                                            | de Almeida-Pititto 2020         |
| 2                      | No                                                                     | No                                                                                  | Yes                                                  | No                                                                         | No                                                      | Yes                                        | No                                                             | Del Sole 2020                   |
| 2                      | No                                                                     | No                                                                                  | n/a                                                  | No                                                                         | Partial yes                                             | Yes                                        | no                                                             | Deravi 2020                     |
| 2                      | No                                                                     | No                                                                                  | Partial yes                                          | No                                                                         | No                                                      | Partial yes                                | no                                                             | Desai 2020                      |
| 1                      | No                                                                     | No                                                                                  | n/a                                                  | No                                                                         | No                                                      | Partial yes                                | no                                                             | Deshmukh 2020                   |
| 5                      | Partial yes                                                            | Partial yes                                                                         | Partial yes                                          | Partial yes                                                                | No                                                      | Partial yes                                | No                                                             | Dessie 2021                     |
| 2                      | Partial yes                                                            | No                                                                                  | Partial yes                                          | No                                                                         | No                                                      | No                                         | No                                                             | Dhar 2021                       |
| 5                      | Yes                                                                    | Yes                                                                                 | Yes                                                  | Yes                                                                        | No                                                      | Yes                                        | No                                                             | Du 2020                         |
| 5                      | Partial yes                                                            | Partial yes                                                                         | Partial yes                                          | Partial yes                                                                | No                                                      | Partial yes                                | No                                                             | Du 2021                         |
| 4                      | Yes                                                                    | No                                                                                  | Yes                                                  | Yes                                                                        | No                                                      | Yes                                        | No                                                             | Emami 2020                      |
| 7                      | Yes                                                                    | Yes                                                                                 | Yes                                                  | Yes                                                                        | yes                                                     | Yes                                        | yes                                                            | Espinosa 2020                   |
| 1                      | No                                                                     | No                                                                                  | Yes                                                  | No                                                                         | No                                                      | No                                         | No                                                             | Fadini 2020                     |
| 4                      | Yes                                                                    | No                                                                                  | Yes                                                  | Yes                                                                        | No                                                      | Partial yes                                | No                                                             | Faghir-Gangi 2020               |
| 6                      | Yes                                                                    | Yes                                                                                 | Partial yes                                          | No                                                                         | Yes                                                     | Partial yes                                | Yes                                                            | Fang 2020                       |
| 4                      | Partial yes                                                            | No                                                                                  | Partial yes                                          | Partial yes                                                                | No                                                      | Partial yes                                | No                                                             | Fathi 2021                      |
| 6                      | Yes                                                                    | Yes                                                                                 | Yes                                                  | Yes                                                                        | No                                                      | Partial yes                                | Yes                                                            | Figliozi 2020                   |
| 0                      | No                                                                     | No                                                                                  | n/a                                                  | No                                                                         | No                                                      | No                                         | No                                                             | Flaherty 2020                   |
| 6                      | Partial yes                                                            | Partial yes                                                                         | Partial yes                                          | Partial yes                                                                | No                                                      | Partial yes                                | Yes                                                            | Gaba 2022                       |
| 0                      | No                                                                     | No                                                                                  | n/a                                                  | No                                                                         | No                                                      | No                                         | No                                                             | Gallo Marin 2020                |
| 6                      | Partial yes                                                            | Partial yes                                                                         | Partial yes                                          | Partial yes                                                                | No                                                      | Partial yes                                | Yes                                                            | Ganesh 2022                     |
| 4                      | No                                                                     | Partial yes                                                                         | Partial yes                                          | Partial yes                                                                | No                                                      | Partial yes                                | No                                                             | Giri 2021                       |
| 4                      | No                                                                     | Partial yes                                                                         | Partial yes                                          | Partial yes                                                                | No                                                      | Partial yes                                | No                                                             | Giri 2021                       |
| 1                      | No                                                                     | No                                                                                  | No                                                   | No                                                                         | No                                                      | Partial yes                                | No                                                             | Goel 2021 (see comment)         |
| 2                      | No                                                                     | No                                                                                  | Partial yes                                          | No                                                                         | No                                                      | Partial yes                                | no                                                             | Gold 2020                       |
| 1                      | No                                                                     | No                                                                                  | n/a                                                  | No                                                                         | No                                                      | Partial yes                                | No                                                             | Guler 2020                      |

| Total yes/ partial yes | Assessment of presence and likely impact of publication bias (item 15) | Consideration of risk of bias when interpreting the results of the review (item 13) | Appropriateness of meta-analytical methods (item 11) | Risk of bias from individual studies being included in the review (item 9) | Justification for excluding individual studies (item 7) | Adequacy of the literature search (item 4) | Protocol registered before commencement of the review (item 2) |   |
|------------------------|------------------------------------------------------------------------|-------------------------------------------------------------------------------------|------------------------------------------------------|----------------------------------------------------------------------------|---------------------------------------------------------|--------------------------------------------|----------------------------------------------------------------|---|
| Guo 2020               | Yes                                                                    | No                                                                                  | Yes                                                  | No                                                                         | No                                                      | Yes                                        | No                                                             | 3 |
| Gupta 2021             | Partial yes                                                            | Partial yes                                                                         | Partial yes                                          | Partial yes                                                                | No                                                      | Partial yes                                | No                                                             | 5 |
| Han 2022               | Partial yes                                                            | Partial yes                                                                         | Partial yes                                          | Partial yes                                                                | No                                                      | Partial yes                                | Yes                                                            | 6 |
| Hariyanto 2020         | No                                                                     | No                                                                                  | Yes                                                  | No                                                                         | No                                                      | Partial yes                                | No                                                             | 2 |
| Hariyanto 2021         | Partial yes                                                            | Partial yes                                                                         | Partial yes                                          | Partial yes                                                                | No                                                      | Partial yes                                | No                                                             | 5 |
| Hartmann-Boyce 2020    | No                                                                     | Partial yes                                                                         | n/a                                                  | No                                                                         | No                                                      | No                                         | No                                                             | 1 |
| Hoang 2021             | Partial yes                                                            | No                                                                                  | Partial yes                                          | No                                                                         | No                                                      | Partial yes                                | No                                                             | 3 |
| Honardoost 2021        | Partial yes                                                            | No                                                                                  | Partial yes                                          | Partial yes                                                                | No                                                      | No                                         | No                                                             | 3 |
| Hu 2020                | Yes                                                                    | No                                                                                  | Yes                                                  | Yes                                                                        | No                                                      | Yes                                        | No                                                             | 4 |
| Hu 2021                | Partial yes                                                            | No                                                                                  | Partial yes                                          | No                                                                         | No                                                      | Partial yes                                | No                                                             | 3 |
| Huang 2020             | Yes                                                                    | No                                                                                  | Yes                                                  | No                                                                         | No                                                      | Partial yes                                | No                                                             | 3 |
| Hussain 2020           | No                                                                     | No                                                                                  | n/a                                                  | No                                                                         | No                                                      | Yes                                        | No                                                             | 1 |
| Hussain 2020           | No                                                                     | No                                                                                  | Yes                                                  | Yes                                                                        | No                                                      | Yes                                        | No                                                             | 3 |
| Izcovich 2020          | Yes                                                                    | Yes                                                                                 | Yes                                                  | Yes                                                                        | yes                                                     | Yes                                        | yes                                                            | 7 |
| Javanmardi 2020        | Yes                                                                    | No                                                                                  | Yes                                                  | Yes                                                                        | yes                                                     | Partial yes                                | no                                                             | 5 |
| Jindal 2022            | Partial yes                                                            | No                                                                                  | Partial yes                                          | Partial yes                                                                | No                                                      | Partial yes                                | No                                                             | 4 |
| Kaminska 2021          | No                                                                     | No                                                                                  | Partial yes                                          | Partial yes                                                                | No                                                      | Partial yes                                | No                                                             | 3 |
| Kan 2021               | Partial yes                                                            | Partial yes                                                                         | Partial yes                                          | Yes                                                                        | No                                                      | Partial yes                                | No                                                             | 5 |
| Kandil 2021            | Partial yes                                                            | No                                                                                  | Partial yes                                          | Partial yes                                                                | No                                                      | Partial yes                                | No                                                             | 4 |
| Kaur 2020              | No                                                                     | No                                                                                  | No                                                   | No                                                                         | No                                                      | No                                         | No                                                             | 0 |
| Khan 2020              | Yes                                                                    | No                                                                                  | Partial yes                                          | Yes                                                                        | yes                                                     | Yes                                        | no                                                             | 5 |
| Khateri 2020           | yes                                                                    | Yes                                                                                 | Yes                                                  | Yes                                                                        | Partial yes                                             | Yes                                        | no                                                             | 6 |
| Kow 2020               | No                                                                     | Partial yes                                                                         | Yes                                                  | No                                                                         | Yes                                                     | Partial yes                                | No                                                             | 4 |
| Kubjane 2020           | Partial yes                                                            | Partial yes                                                                         | Yes                                                  | Partial yes                                                                | Yes                                                     | Partial yes                                | Partial yes                                                    | 7 |
| Kumar 2020 (1)         | Yes                                                                    | Partial yes                                                                         | Yes                                                  | Yes                                                                        | No                                                      | Partial yes                                | Yes                                                            | 6 |
| Kumar 2020 (2)         | No                                                                     | No                                                                                  | Yes                                                  | No                                                                         | Yes                                                     | No                                         | Yes                                                            | 3 |
| Kumar 2021             | Partial yes                                                            | No                                                                                  | Partial yes                                          | No                                                                         | No                                                      | Partial yes                                | No                                                             | 3 |
| Lee 2020               | No                                                                     | No                                                                                  | Yes                                                  | No                                                                         | No                                                      | Partial yes                                | Yes                                                            | 3 |
| Li 2020 (1)            | Yes                                                                    | Yes                                                                                 | No                                                   | Yes                                                                        | No                                                      | Partial Yes                                | Partial Yes                                                    | 5 |
| Li 2020 (2)            | No                                                                     | Yes                                                                                 | Yes                                                  | Partial Yes                                                                | No                                                      | Partial yes                                | Partial Yes                                                    | 5 |
| Li 2020 (3)            | No                                                                     | No                                                                                  | Yes                                                  | Yes                                                                        | yes                                                     | Yes                                        | no                                                             | 4 |
| Li 2020 (4)            | No                                                                     | No                                                                                  | No                                                   | Yes                                                                        | yes                                                     | Partial yes                                | no                                                             | 3 |
| Li 2021                | Partial yes                                                            | Partial yes                                                                         | Partial yes                                          | Partial yes                                                                | No                                                      | Partial yes                                | No                                                             | 5 |
| Li 2021                | Partial yes                                                            | Partial yes                                                                         | Partial yes                                          | Partial yes                                                                | No                                                      | Partial yes                                | Yes                                                            | 6 |
| Li 2021                | Partial yes                                                            | Partial yes                                                                         | Partial yes                                          | Partial yes                                                                | No                                                      | Partial yes                                | Yes                                                            | 6 |
| Liu 2020 (1)           | Yes                                                                    | No                                                                                  | Yes                                                  | Yes                                                                        | yes                                                     | Yes                                        | no                                                             | 5 |
| Liu 2020 (2)           | Yes                                                                    | Yes                                                                                 | Yes                                                  | Yes                                                                        | No                                                      | Partial yes                                | No                                                             | 5 |
| Lu 2020                | Partial yes                                                            | No                                                                                  | n/a                                                  | Yes                                                                        | yes                                                     | Partial yes                                | Yes                                                            | 5 |
| Lukito 2020            | Yes                                                                    | Yes                                                                                 | Yes                                                  | Yes                                                                        | No                                                      | Yes                                        | No                                                             | 5 |
| Luo 2020               | Yes                                                                    | Yes                                                                                 | Yes                                                  | Yes                                                                        | yes                                                     | Partial yes                                | no                                                             | 6 |
| Maddaloni 2021         | Partial yes                                                            | No                                                                                  | Partial yes                                          | No                                                                         | No                                                      | No                                         | No                                                             | 2 |
| Mahumud 2020           | Yes                                                                    | No                                                                                  | Yes                                                  | Yes                                                                        | No                                                      | Yes                                        | No                                                             | 4 |
| Mair 2020              | No                                                                     | Yes                                                                                 | Yes                                                  | Yes                                                                        | No                                                      | Yes                                        | no                                                             | 4 |

| Total yes/ partial yes | Assessment of presence and likely impact of publication bias (item 15) | Consideration of risk of bias when interpreting the results of the review (item 13) | Appropriateness of meta-analytical methods (item 11) | Risk of bias from individual studies being included in the review (item 9) | Justification for excluding individual studies (item 7) | Adequacy of the literature search (item 4) | Protocol registered before commencement of the review (item 2) |                         |
|------------------------|------------------------------------------------------------------------|-------------------------------------------------------------------------------------|------------------------------------------------------|----------------------------------------------------------------------------|---------------------------------------------------------|--------------------------------------------|----------------------------------------------------------------|-------------------------|
| 5                      | Yes                                                                    | Partial yes                                                                         | Yes                                                  | Yes                                                                        | No                                                      | Yes                                        | No                                                             | Mantovani 2020          |
| 5                      | yes                                                                    | No                                                                                  | Yes                                                  | Yes                                                                        | No                                                      | Yes                                        | yes                                                            | Matsushita 2020         |
| 6                      | Partial yes                                                            | Partial yes                                                                         | Partial yes                                          | Partial yes                                                                | No                                                      | Partial yes                                | Yes                                                            | Mattey-Mora 2022        |
| 2                      | No                                                                     | No                                                                                  | n/a                                                  | Yes                                                                        | No                                                      | Partial yes                                | No                                                             | Mehraeen 2020           |
| 6                      | Yes                                                                    | Partial yes                                                                         | Yes                                                  | Yes                                                                        | Partial yes                                             | Yes                                        | no                                                             | Meng 2020               |
| 3                      | Partial yes                                                            | No                                                                                  | Partial yes                                          | No                                                                         | No                                                      | Partial yes                                | No                                                             | Meng 2021               |
| 7                      | yes                                                                    | Yes                                                                                 | Yes                                                  | Yes                                                                        | yes                                                     | Partial yes                                | yes                                                            | Mesas 2020              |
| 4                      | Yes                                                                    | No                                                                                  | Yes                                                  | No                                                                         | No                                                      | Yes                                        | Yes                                                            | Miller 2020             |
| 4                      | No                                                                     | No                                                                                  | Partial yes                                          | Partial yes                                                                | No                                                      | Partial yes                                | Yes                                                            | Minh 2021               |
| 5                      | Partial yes                                                            | Partial yes                                                                         | Partial yes                                          | Partial yes                                                                | No                                                      | Partial yes                                | No                                                             | Mirjalili 2021          |
| 3                      | No                                                                     | No                                                                                  | Partial yes                                          | Partial yes                                                                | No                                                      | Partial yes                                | No                                                             | Mishra 2021             |
| 5                      | yes                                                                    | Yes                                                                                 | Yes                                                  | Yes                                                                        | No                                                      | Partial yes                                | No                                                             | Moula 2020              |
| 6                      | Yes                                                                    | Yes                                                                                 | Yes                                                  | Yes                                                                        | yes                                                     | Partial yes                                | no                                                             | Mudatsir 2020           |
| 2                      | No                                                                     | No                                                                                  | No                                                   | Yes                                                                        | No                                                      | Partial yes                                | No                                                             | Nandy 2020              |
| 2                      | No                                                                     | No                                                                                  | Yes                                                  | No                                                                         | No                                                      | Partial yes                                | No                                                             | Ng 2021                 |
| 7                      | Yes                                                                    | Yes                                                                                 | Yes                                                  | Yes                                                                        | Yes                                                     | Partial yes                                | Yes                                                            | Ng 2022                 |
| 6                      | Yes                                                                    | Yes                                                                                 | Yes                                                  | Partial yes                                                                | No                                                      | Partial yes                                | Yes                                                            | Nguyen 2022             |
| 4                      | yes                                                                    | No                                                                                  | Yes                                                  | Yes                                                                        | No                                                      | Partial yes                                | no                                                             | Noor 2020               |
| 6                      | Yes                                                                    | Yes                                                                                 | Yes                                                  | Yes                                                                        | No                                                      | Partial yes                                | Yes                                                            | Ogungbe 2021            |
| 1                      | No                                                                     | No                                                                                  | n/a                                                  | No                                                                         | No                                                      | Partial yes                                | No                                                             | Pal 2020                |
| 4                      | No                                                                     | Partial yes                                                                         | Yes                                                  | Yes                                                                        | No                                                      | Partial yes                                | No                                                             | Pal 2021                |
| 4                      | Yes                                                                    | No                                                                                  | Yes                                                  | Yes                                                                        | No                                                      | Yes                                        | No                                                             | Palaodimos 2020         |
| 6                      | Yes                                                                    | Yes                                                                                 | Yes                                                  | Yes                                                                        | No                                                      | Yes                                        | Yes                                                            | Papadopoulos 2021       |
| 4                      | Yes                                                                    | No                                                                                  | Yes                                                  | Yes                                                                        | No                                                      | Yes                                        | No                                                             | Parohan 2020            |
| 3                      | No                                                                     | No                                                                                  | Yes                                                  | Yes                                                                        | No                                                      | Yes                                        | No                                                             | Parveen 2020            |
| 1                      | No                                                                     | No                                                                                  | n/a                                                  | No                                                                         | No                                                      | No                                         | Partial Yes                                                    | Patel 2020 (1)          |
| 4                      | No                                                                     | Yes                                                                                 | Yes                                                  | Yes                                                                        | No                                                      | Yes                                        | No                                                             | Patel 2020 (2)          |
| 2                      | No                                                                     | No                                                                                  | Yes                                                  | No                                                                         | No                                                      | Partial yes                                | No                                                             | Patoulas 2021           |
| 6                      | Yes                                                                    | Partial yes                                                                         | Yes                                                  | Yes                                                                        | No                                                      | Yes                                        | Yes                                                            | Pinedo-Torres 2020      |
| 1                      | No                                                                     | No                                                                                  | Yes                                                  | No                                                                         | No                                                      | No                                         | No                                                             | Pinto 2020              |
| 6                      | Yes                                                                    | Yes                                                                                 | Yes                                                  | Yes                                                                        | yes                                                     | Yes                                        | No                                                             | Plasencia-Urizarri 2020 |
| 3                      | Yes                                                                    | No                                                                                  | Yes                                                  | No                                                                         | No                                                      | Partial yes                                | No                                                             | Poly 2021               |
| 5                      | Yes                                                                    | Yes                                                                                 | Yes                                                  | Yes                                                                        | No                                                      | Partial yes                                | No                                                             | Poly 2021b              |
| 6                      | Yes                                                                    | Yes                                                                                 | Yes                                                  | Partial yes                                                                | Yes                                                     | Partial yes                                | No                                                             | Prattichizzo 2022       |
| 4                      | No                                                                     | Partial yes                                                                         | Yes                                                  | Partial yes                                                                | No                                                      | Partial yes                                | No                                                             | Puri 2022               |
| 5                      | Yes                                                                    | Yes                                                                                 | Yes                                                  | No                                                                         | No                                                      | Partial Yes                                | Partial Yes                                                    | Qui 2020                |
| 5                      | No                                                                     | Yes                                                                                 | Yes                                                  | Yes                                                                        | yes                                                     | Partial yes                                | no                                                             | Radwan 2020             |
| 5                      | Yes                                                                    | No                                                                                  | Yes                                                  | Partial yes                                                                | No                                                      | Partial yes                                | Yes                                                            | Rahman 2021             |
| 2                      | No                                                                     | No                                                                                  | Yes                                                  | No                                                                         | No                                                      | Partial yes                                | No                                                             | Rahman 2021a            |
| 5                      | Yes                                                                    | Yes                                                                                 | Yes                                                  | Yes                                                                        | No                                                      | Partial yes                                | No                                                             | Rahmati 2022            |

| Total yes/ partial yes | Assessment of presence and likely impact of publication bias (item 15) | Consideration of risk of bias when interpreting the results of the review (item 13) | Appropriateness of meta-analytical methods (item 11) | Risk of bias from individual studies being included in the review (item 9) | Justification for excluding individual studies (item 7) | Adequacy of the literature search (item 4) | Protocol registered before commencement of the review (item 2) |                           |
|------------------------|------------------------------------------------------------------------|-------------------------------------------------------------------------------------|------------------------------------------------------|----------------------------------------------------------------------------|---------------------------------------------------------|--------------------------------------------|----------------------------------------------------------------|---------------------------|
| 5                      | Yes                                                                    | No                                                                                  | Yes                                                  | Partial yes                                                                | No                                                      | Partial yes                                | Yes                                                            | Rakhmat 2021              |
| 5                      | Yes                                                                    | Yes                                                                                 | Yes                                                  | Partial yes                                                                | No                                                      | Partial yes                                | No                                                             | Rico-Martin 2021          |
| 1                      | No                                                                     | No                                                                                  | Partial yes                                          | No                                                                         | No                                                      | No                                         | No                                                             | Rod 2020                  |
| 5                      | Yes                                                                    | Partial yes                                                                         | Yes                                                  | Yes                                                                        | No                                                      | Yes                                        | No                                                             | Roncon 2020               |
| 2                      | No                                                                     | Partial yes                                                                         | n/a                                                  | No                                                                         | No                                                      | Yes                                        | no                                                             | Sacks 2020                |
| 6                      | Yes                                                                    | Yes                                                                                 | Yes                                                  | Partial yes                                                                | No                                                      | Partial yes                                | Yes                                                            | Saha 2021                 |
| 3                      | Yes                                                                    | No                                                                                  | Yes                                                  | No                                                                         | No                                                      | Partial yes                                | No                                                             | Sahni 2021                |
| 5                      | Yes                                                                    | Partial yes                                                                         | Yes                                                  | Partial yes                                                                | No                                                      | Partial yes                                | No                                                             | Sahu 2021                 |
| 6                      | Yes                                                                    | Partial yes                                                                         | Yes                                                  | Yes                                                                        | No                                                      | Partial yes                                | Yes                                                            | Saleh 2021                |
| 5                      | Yes                                                                    | No                                                                                  | Yes                                                  | Yes                                                                        | No                                                      | Yes                                        | Yes                                                            | Sales-Peres 2020          |
| 1                      | No                                                                     | No                                                                                  | n/a                                                  | No                                                                         | No                                                      | Partial yes                                | No                                                             | Sanyaolu 2020             |
| 7                      | Partial yes                                                            | Yes                                                                                 | Yes                                                  | Yes                                                                        | Partial yes                                             | Yes                                        | yes                                                            | Sathish 2020              |
| 4                      | No                                                                     | No                                                                                  | Yes                                                  | Partial yes                                                                | No                                                      | Partial yes                                | Yes                                                            | Sathish 2021              |
| 1                      | No                                                                     | No                                                                                  | n/a                                                  | No                                                                         | No                                                      | Partial yes                                | no                                                             | Sayed 2020                |
| 4                      | Yes                                                                    | No                                                                                  | Yes                                                  | Yes                                                                        | No                                                      | Partial yes                                | No                                                             | Schlesinger 2021          |
| 5                      | Yes                                                                    | Partial yes                                                                         | Yes                                                  | Yes                                                                        | No                                                      | Yes                                        | No                                                             | Sepandi 2020              |
| 6                      | Yes                                                                    | Yes                                                                                 | Yes                                                  | Yes                                                                        | No                                                      | Partial yes                                | Yes                                                            | Shafiee 2022              |
| 5                      | Yes                                                                    | Yes                                                                                 | Yes                                                  | Yes                                                                        | No                                                      | Yes                                        | No                                                             | Shang 2020                |
| 3                      | No                                                                     | No                                                                                  | Partial yes                                          | No                                                                         | yes                                                     | Partial yes                                | no                                                             | Shoar 2020                |
| 5                      | Yes                                                                    | No                                                                                  | Yes                                                  | Yes                                                                        | No                                                      | Partial yes                                | Yes                                                            | Shrestha 2021             |
| 4                      | Yes                                                                    | No                                                                                  | Yes                                                  | Yes                                                                        | No                                                      | Partial yes                                | No                                                             | Silverio 2021             |
| 0                      | No                                                                     | No                                                                                  | n/a                                                  | No                                                                         | No                                                      | No                                         | No                                                             | Singh 2020 (1)            |
| 6                      | Yes                                                                    | No                                                                                  | Yes                                                  | Yes                                                                        | yes                                                     | Partial yes                                | Yes                                                            | Singh 2020 (2)            |
| 1                      | No                                                                     | No                                                                                  | n/a                                                  | No                                                                         | No                                                      | Yes                                        | no                                                             | Singh 2020 (3)            |
| 5                      | Yes                                                                    | Yes                                                                                 | Yes                                                  | Partial yes                                                                | No                                                      | Partial yes                                | No                                                             | Singhal 2021              |
| 6                      | Yes                                                                    | Yes                                                                                 | Yes                                                  | Yes                                                                        | No                                                      | Yes                                        | Yes                                                            | Ssentongo 2020            |
| 3                      | No                                                                     | No                                                                                  | Yes                                                  | Yes                                                                        | No                                                      | Partial yes                                | No                                                             | Subramaniam 2021          |
| 1                      | No                                                                     | No                                                                                  | n/a                                                  | No                                                                         | No                                                      | Partial yes                                | no                                                             | Tadic 2020                |
| 7                      | Yes                                                                    | Yes                                                                                 | Yes                                                  | Yes                                                                        | Yes                                                     | Yes                                        | Yes                                                            | Tan 2020                  |
| 4                      | Yes                                                                    | No                                                                                  | Yes                                                  | Yes                                                                        | No                                                      | Partial yes                                | No                                                             | Taylor 2021               |
| 4                      | Yes                                                                    | No                                                                                  | Yes                                                  | Partial yes                                                                | No                                                      | Partial yes                                | No                                                             | Thakur 2021               |
| 3                      | No                                                                     | No                                                                                  | Partial yes                                          | Yes                                                                        | No                                                      | Partial yes                                | No                                                             | Tian 2020                 |
| 7                      | Yes                                                                    | Yes                                                                                 | Yes                                                  | Yes                                                                        | Yes                                                     | Yes                                        | Yes                                                            | Treskova-Schwarzbach 2021 |
| 5                      | Yes                                                                    | Yes                                                                                 | Yes                                                  | Yes                                                                        | No                                                      | Partial yes                                | No                                                             | Vardavas 2022             |
| 6                      | Yes                                                                    | Partial yes                                                                         | Partial yes                                          | Yes                                                                        | No                                                      | Yes                                        | Yes                                                            | Varikasuvu 2020           |
| 2                      | No                                                                     | No                                                                                  | Yes                                                  | No                                                                         | No                                                      | Partial yes                                | No                                                             | Venkata 2020              |
| 4                      | Yes                                                                    | No                                                                                  | Partial yes                                          | No                                                                         | Partial yes                                             | Yes                                        | No                                                             | Wang 2020 (1)             |
| 6                      | Yes                                                                    | Partial yes                                                                         | Partial yes                                          | Yes                                                                        | Partial yes                                             | Partial yes                                | No                                                             | Wang 2020 (2)             |
| 3                      | Yes                                                                    | No                                                                                  | Yes                                                  | No                                                                         | No                                                      | Yes                                        | No                                                             | Wang 2020 (3)             |
| 4                      | Yes                                                                    | Yes                                                                                 | Yes                                                  | No                                                                         | No                                                      | Partial yes                                | No                                                             | Wang 2022                 |
| 1                      | No                                                                     | No                                                                                  | n/a                                                  | No                                                                         | No                                                      | Partial yes                                | No                                                             | Wicaksana 2020            |

| Total yes/ partial yes | Assessment of presence and likely impact of publication bias (item 15) | Consideration of risk of bias when interpreting the results of the review (item 13) | Appropriateness of meta-analytical methods (item 11) | Risk of bias from individual studies being included in the review (item 9) | Justification for excluding individual studies (item 7) | Adequacy of the literature search (item 4) | Protocol registered before commencement of the review (item 2) |                   |
|------------------------|------------------------------------------------------------------------|-------------------------------------------------------------------------------------|------------------------------------------------------|----------------------------------------------------------------------------|---------------------------------------------------------|--------------------------------------------|----------------------------------------------------------------|-------------------|
| 2                      | No                                                                     | No                                                                                  | Partial yes                                          | No                                                                         | No                                                      | Yes                                        | No                                                             | Wu 2020           |
| 6                      | Yes                                                                    | Yes                                                                                 | Yes                                                  | Yes                                                                        | No                                                      | Partial yes                                | Yes                                                            | Wu 2021           |
| 5                      | Yes                                                                    | No                                                                                  | Yes                                                  | Yes                                                                        | No                                                      | Yes                                        | Yes                                                            | Xiang 2021        |
| 5                      | Yes                                                                    | Partial yes                                                                         | Yes                                                  | Partial yes                                                                | No                                                      | Partial yes                                | No                                                             | Xie 2021          |
| 5                      | Yes                                                                    | Yes                                                                                 | Partial yes                                          | Yes                                                                        | Partial yes                                             | No                                         | No                                                             | Xu 2020           |
| 0                      | No                                                                     | No                                                                                  | n/a                                                  | No                                                                         | No                                                      | No                                         | No                                                             | Yanai 2020        |
| 3                      | No                                                                     | No                                                                                  | Partial yes                                          | No                                                                         | Partial yes                                             | Partial yes                                | No                                                             | Yang 2020         |
| 5                      | Yes                                                                    | Partial yes                                                                         | Yes                                                  | Partial yes                                                                | No                                                      | Partial yes                                | No                                                             | Yang 2021         |
| 5                      | Yes                                                                    | Partial yes                                                                         | Yes                                                  | Yes                                                                        | No                                                      | Partial yes                                | No                                                             | Yang 2021         |
| 5                      | Yes                                                                    | Yes                                                                                 | Yes                                                  | Yes                                                                        | No                                                      | Partial yes                                | No                                                             | Yang 2021         |
| 5                      | Partial yes                                                            | No                                                                                  | Partial yes                                          | Yes                                                                        | Partial yes                                             | Yes                                        | No                                                             | Yifan 2020        |
| 4                      | Yes                                                                    | No                                                                                  | Yes                                                  | No                                                                         | No                                                      | Partial yes                                | Yes                                                            | Yin 2021          |
| 1                      | No                                                                     | No                                                                                  | n/a                                                  | No                                                                         | No                                                      | Partial yes                                | No                                                             | Zaki 2020         |
| 1                      | No                                                                     | No                                                                                  | No MA                                                | No                                                                         | No                                                      | Partial yes                                | No                                                             | Zangiabadian 2021 |
| 5                      | Yes                                                                    | Partial yes                                                                         | Yes                                                  | Yes                                                                        | No                                                      | Partial yes                                | No                                                             | Zein 2022         |
| 4                      | Yes                                                                    | No                                                                                  | Yes                                                  | Yes                                                                        | No                                                      | Partial yes                                | No                                                             | Zeng-HongWu 2021  |
| 4                      | Yes                                                                    | No                                                                                  | Yes                                                  | Yes                                                                        | No                                                      | Partial yes                                | No                                                             | Zhao 2020 (1)     |
| 2                      | No                                                                     | Yes                                                                                 | No                                                   | No                                                                         | No                                                      | Partial yes                                | No                                                             | Zhao 2020 (2)     |
| 5                      | No                                                                     | Yes                                                                                 | Yes                                                  | Yes                                                                        | Partial yes                                             | Partial yes                                | No                                                             | Zheng 2020        |
| 4                      | Yes                                                                    | No                                                                                  | Partial yes                                          | No                                                                         | Yes                                                     | Partial yes                                | No                                                             | Zhou 2020 (1)     |
| 6                      | Yes                                                                    | Partial yes                                                                         | Partial yes                                          | No                                                                         | Partial yes                                             | Partial yes                                | Partial yes                                                    | Zhou 2020 (2)     |
| 4                      | Yes                                                                    | No                                                                                  | Yes                                                  | Yes                                                                        | No                                                      | Partial yes                                | No                                                             | Zhu 2021          |



Table 5. Prevalence of diabetes in people with COVID-19<sup>3</sup>

| First author/Year | Prevalence                                                                                                                                                                                                                                                                                                                                                                                                                         |
|-------------------|------------------------------------------------------------------------------------------------------------------------------------------------------------------------------------------------------------------------------------------------------------------------------------------------------------------------------------------------------------------------------------------------------------------------------------|
| Abdi 2020         | 14.5% (95% CI 10.4 to 19.9)                                                                                                                                                                                                                                                                                                                                                                                                        |
| Aktar 2021        | 11.8% (95% CI 8.3 to 19.1)                                                                                                                                                                                                                                                                                                                                                                                                         |
| AlirezaAbdi 2021  | 14.5% (95% CI 10.4 to 19.9)                                                                                                                                                                                                                                                                                                                                                                                                        |
| Ashktorab 2021    | 8.3% (Range 0.6 to 20.6%)                                                                                                                                                                                                                                                                                                                                                                                                          |
| Badawi 2021       | 11.8% (95% CI 10.9 to 12.6) (China only)                                                                                                                                                                                                                                                                                                                                                                                           |
| Bae 2021          | 15.16% (95% CI 12.9 to 17.8)                                                                                                                                                                                                                                                                                                                                                                                                       |
| Bajgain 2020      | 17.40%                                                                                                                                                                                                                                                                                                                                                                                                                             |
| Baradaran 2020    | 10%                                                                                                                                                                                                                                                                                                                                                                                                                                |
| Barrera 2020      | Across all studies: 12% (95% CI 10, 15), N=1414/12870, 31 studies<br>Severe COVID-19 only: 18% (95% CI 16 to 20, n = 1099)                                                                                                                                                                                                                                                                                                         |
| Bennett 2020      | 9.2% in hospitalised patients                                                                                                                                                                                                                                                                                                                                                                                                      |
| Bradley 2022      | 31% (95% CI 25 to 38)                                                                                                                                                                                                                                                                                                                                                                                                              |
| Chen 2022         | Overall 12.78% (95%CI 11.93, 13.63)<br>Prevalence in mild disease: 7.84% (5.78, 10.54)<br>Prevalence in moderate disease: 8.59% (7.25, 10.16)<br>Prevalence in severe disease: 17.99% (16.29, 19.84)<br>Prevalence in critical disease: 22.68% (19.93, 25.69)                                                                                                                                                                      |
| Chua 2021         | Overall prevalence 19.5% (95% CI 15.9, 23.4)<br>Prevalence in non-severe disease - 5.9% (2.58, 10.14)                                                                                                                                                                                                                                                                                                                              |
| Del Sole 2020     | 10.1%                                                                                                                                                                                                                                                                                                                                                                                                                              |
| Desai 2020        | Overall prevalence of diabetes in COVID-19 patients with a mean age>50 years was 13.2% [95% CI 9.7%-17.1%, I <sup>2</sup> =53%]; studies with relatively younger patients (mean age <50 years) had a pooled prevalence of 9.0% [95% CI 5.1%-13.5%, I <sup>2</sup> =63%]                                                                                                                                                            |
| Du 2020           | The pooled prevalence of diabetes was 10% [95% confidence interval (CI): 7%-15%] in COVID-19 patients. The prevalence of diabetes was higher in severe patients (17%; 95%CI: 14%-20%) than in non-severe patients (6%; 95%CI: 5%-8%), and in dead patients (30%; 95%CI: 13%-46%) than in survivors (8%; 95%CI: 2%-15%). Both funnel plot and Egger's test showed publication bias on the pooled prevalence of diabetes (P < 0.001) |
| Emami 2020        | Pooled prevalence for diabetes 7.87% (95% CI 6.57, 9.28)                                                                                                                                                                                                                                                                                                                                                                           |
| Espinosa 2020**   | 22% (95% CI: 21-23)                                                                                                                                                                                                                                                                                                                                                                                                                |
| Fadini 2020       | Pooled prevalence for diabetes 10.3% (For comparison, the nationwide prevalence of diabetes in China in 2013 was 10.9% overall and 12.3% among people aged 40–59)                                                                                                                                                                                                                                                                  |
| Faghir-Gangi 2020 | Pooled prevalence 14% (95% CI 11, 17), I <sup>2</sup> =93.4%, random effects model.                                                                                                                                                                                                                                                                                                                                                |
| Fathi 2021        | 14.29% (95% CI 11.88, 16.87), I <sup>2</sup> 99.1%                                                                                                                                                                                                                                                                                                                                                                                 |
| Giri 2021         | 11.5% (95%CI 9.0, 14.1), I <sup>2</sup> =66%                                                                                                                                                                                                                                                                                                                                                                                       |
| Giri 2021         | 17.1% (95%CI 14.0, 20.3)                                                                                                                                                                                                                                                                                                                                                                                                           |
| Goel 2021         | 9.96%                                                                                                                                                                                                                                                                                                                                                                                                                              |
| Gold 2020         | 9.65% (95%CI: 6.83%- 13.48%)                                                                                                                                                                                                                                                                                                                                                                                                       |
| Guler 2020        | 7.7%                                                                                                                                                                                                                                                                                                                                                                                                                               |
| Gupta 2021        | 16.8%                                                                                                                                                                                                                                                                                                                                                                                                                              |

<sup>3</sup> \*\* considered higher quality (judged as yes or partial yes for at least 6 of 7 critical AMSTAR-2 domains)

| First author/Year   | Prevalence                                                                                                                                                                                                                                                                                                                                                                                                                                                                                                                                                                                                                                                                                                                                                                                                                                                                                                                                       |
|---------------------|--------------------------------------------------------------------------------------------------------------------------------------------------------------------------------------------------------------------------------------------------------------------------------------------------------------------------------------------------------------------------------------------------------------------------------------------------------------------------------------------------------------------------------------------------------------------------------------------------------------------------------------------------------------------------------------------------------------------------------------------------------------------------------------------------------------------------------------------------------------------------------------------------------------------------------------------------|
| Hartmann-Boyce 2020 | Systematic reviews primarily consisting of data from China have estimated rates of 8% (95% CI 6–11%) (2), 7.87% (95% CI 6.57–9.28%) (3), and 9.7% (95% CI 6.9–12.5%) of diabetes in people hospitalized with COVID-19. The percentage hospitalization appears higher in the U.S., where from February 12 to 28 March 2020, PWD accounted for 10.9% of all COVID-19 patients (similar to the proportion of the U.S. population with diabetes), 24% of hospitalized cases (non-intensive care unit [ICU]), and 32% of ICU admissions. A recent (preprint) U.K. study found uncomplicated diabetes to be the second most common comorbidity (19%) in patients hospitalized with COVID-19; complicated diabetes is reported in a figure only, but prevalence looks to be approximately 6.5%                                                                                                                                                          |
| Honardoost 2021     | 9.96%                                                                                                                                                                                                                                                                                                                                                                                                                                                                                                                                                                                                                                                                                                                                                                                                                                                                                                                                            |
| Hu 2020             | 7.7 % (95% CI 6.1–9.3 %)                                                                                                                                                                                                                                                                                                                                                                                                                                                                                                                                                                                                                                                                                                                                                                                                                                                                                                                         |
| Hu 2021             | Severe disease prevalence of diabetes 15% (95%CI 12, 19), I <sup>2</sup> 52.2%<br>ICU prevalence of diabetes 31% (19, 43), I <sup>2</sup> 82.8%                                                                                                                                                                                                                                                                                                                                                                                                                                                                                                                                                                                                                                                                                                                                                                                                  |
| Hussain 2020        | Primary studies included in this meta-analysis reported diabetes prevalence in COVID-19 patients within the range of 2.66% to 40% with a pooled prevalence of 15% (95% CI: 12% to 18%), p<0.0001. Prevalence was computed using a random-effect model because of the presence of significant heterogeneity(I <sup>2</sup> =97.47%). When the prevalence was stratified based on the country, we found a prevalence of 21% (95% CI: 6% to 35%) in the U.S. and 14% (95% CI: 12% to 16%) in China. The single studies from Korea, Spain, and India reported a prevalence of 35%, 19%, and 14% respectively.                                                                                                                                                                                                                                                                                                                                        |
| Jindal 2022         | 17.7% (95% CI 12.2, 25.1), I <sup>2</sup> =99%                                                                                                                                                                                                                                                                                                                                                                                                                                                                                                                                                                                                                                                                                                                                                                                                                                                                                                   |
| Kaur 2020           | 12.80%                                                                                                                                                                                                                                                                                                                                                                                                                                                                                                                                                                                                                                                                                                                                                                                                                                                                                                                                           |
| Khan 2020           | 25.2%                                                                                                                                                                                                                                                                                                                                                                                                                                                                                                                                                                                                                                                                                                                                                                                                                                                                                                                                            |
| Khateri 2020 **     | 14% (pooled)                                                                                                                                                                                                                                                                                                                                                                                                                                                                                                                                                                                                                                                                                                                                                                                                                                                                                                                                     |
| Kumar 2020 (1) **   | The pooled prevalence of diabetes was calculated to be 11.2% (95% CI: 9.5%-13.0%). Heterogeneity was high at 92%. The results of meta-regression showed that proportion of diabetes in patients with COVID-19 was influenced by age (with studies with higher patient age having higher proportion of diabetes, p<0.001), type of composite endpoint (with studies reporting mortality endpoint having higher proportion of diabetes, p=0.004), and country of study (with studies outside of China having higher proportion of diabetes, p=0.006). There was no influence of number of patients in studies or quality score of studies.                                                                                                                                                                                                                                                                                                         |
| Liu 2020 (1)        | 10.0% (95% CI 8.0% to 12.0%)                                                                                                                                                                                                                                                                                                                                                                                                                                                                                                                                                                                                                                                                                                                                                                                                                                                                                                                     |
| Liu 2020 (2)        | 8.5% (95% CI 5.5, 11.4), I <sup>2</sup> 96.2                                                                                                                                                                                                                                                                                                                                                                                                                                                                                                                                                                                                                                                                                                                                                                                                                                                                                                     |
| Mair 2020           | 8% hospitalised; 4% non-hospitalised                                                                                                                                                                                                                                                                                                                                                                                                                                                                                                                                                                                                                                                                                                                                                                                                                                                                                                             |
| Mantovani 2020      | The pooled prevalence of established diabetes in the overall population of confirmed COVID-19 cases (n=83 studies included) was 14.34% (95% confidence intervals [CI] 12.62-16.06%). The high heterogeneity observed in the overall primary analysis of these studies (I <sup>2</sup> =97.8%) likely reflects differences in the characteristics of study populations (mostly age and country). Indeed, the pooled prevalence of pre-existing diabetes was remarkably greater amongst COVID-19 patients aged>60 years than amongst those aged<60 years (23.30% [95%CI19.65-26.94] vs. 8.79% [95%CI 7.56-10.02]; p<0.0001). Furthermore, the pooled prevalence of diabetes was also significantly greater in non-Asian countries than in Asian countries (23.34% [95%CI 16.40-30.28] vs. 11.06% [95%CI 9.73-12.39]; p=0.001), possibly reflecting the marked differences in median age values of the study populations between the two countries. |
| Matsushita 2020     | The prevalence of diabetes ranged from 5% to 58%                                                                                                                                                                                                                                                                                                                                                                                                                                                                                                                                                                                                                                                                                                                                                                                                                                                                                                 |

| First author/Year     | Prevalence                                                                                                                                                                                                                                                                                                                                                                                                                                                                                                                                                       |
|-----------------------|------------------------------------------------------------------------------------------------------------------------------------------------------------------------------------------------------------------------------------------------------------------------------------------------------------------------------------------------------------------------------------------------------------------------------------------------------------------------------------------------------------------------------------------------------------------|
| Meng 2020 **          | The incidences of diabetes in all the included patients were 12.55%. The incidences of diabetes in severe patients were 20.50%                                                                                                                                                                                                                                                                                                                                                                                                                                   |
| Meng 2021             | 9% (95% CI 15, 23), $I^2=56\%$                                                                                                                                                                                                                                                                                                                                                                                                                                                                                                                                   |
| Miller 2020           | 14.40%                                                                                                                                                                                                                                                                                                                                                                                                                                                                                                                                                           |
| Minh 2021             | Prevalence in severe to critical disease: 19% (95% CI 16, 22)<br>Prevalence in non-survivors: 23% (95% CI 16, 33)                                                                                                                                                                                                                                                                                                                                                                                                                                                |
| Mirjalili 2021        | 16.3% (95% CI 8.5, 29.1)                                                                                                                                                                                                                                                                                                                                                                                                                                                                                                                                         |
| Nandy 2020            | The pooled prevalence of Diabetes mellitus (DM) in COVID-19 infection from 8 studies with 1895 patients was 13% (95%CI, 10%–17%). We did a heterogeneity test between 13 studies with a result of $I^2 = 81\%$ , $p < 0.01$                                                                                                                                                                                                                                                                                                                                      |
| Ogungbe 2021          | 21% (95% CI 18%–23%), range 8% to 44%.                                                                                                                                                                                                                                                                                                                                                                                                                                                                                                                           |
| Patel 2020 (1)        | 10%                                                                                                                                                                                                                                                                                                                                                                                                                                                                                                                                                              |
| Patel 2020 (2)        | Diabetes 15.4% (95% CI: 12–19.4%; $p < 0.001$ ; 2897/11680)                                                                                                                                                                                                                                                                                                                                                                                                                                                                                                      |
| Pinedo-Torres 2020 ** | 10.8% (95% CI 5.9, 16.6)                                                                                                                                                                                                                                                                                                                                                                                                                                                                                                                                         |
| Sacks 2020            | The incidence of diabetes in COVID-19 cases in China has varied from 5% to 20% however large-scale data suggest incidence may be in the order of 5.3–7.4% (15–21). These discrepancies may be attributed to incomplete data due to lack of testing and comorbid analysis of cases of death. In comparison, diabetes was reported in approximately 10.9% of the Chinese population prior to COVID-19. Therefore, based on early prevalence studies in China, it appears that people with diabetes are not significantly more likely to be infected with COVID-19. |
| Sales-Peres 2020      | 30.3% in people who also had obesity                                                                                                                                                                                                                                                                                                                                                                                                                                                                                                                             |
| Sanyaolu 2020         | 9.4% to 23.8%                                                                                                                                                                                                                                                                                                                                                                                                                                                                                                                                                    |
| Sathish 2021          | Preexisting diabetes 14.8% (95% CI 8.1–23.0%); newly diagnosed diabetes 14.4%, (95% CI 5.9–25.8%)                                                                                                                                                                                                                                                                                                                                                                                                                                                                |
| Sayed 2020            | 1.7% to 39.7%                                                                                                                                                                                                                                                                                                                                                                                                                                                                                                                                                    |
| Shrestha 2021         | New-onset diabetes 19.70% (CI: 10.93-32.91, $I^2= 96.71\%$ )                                                                                                                                                                                                                                                                                                                                                                                                                                                                                                     |
| Tadic 2020            | 3% to 21%                                                                                                                                                                                                                                                                                                                                                                                                                                                                                                                                                        |
| Thakur 2021           | 18% (15-20%)                                                                                                                                                                                                                                                                                                                                                                                                                                                                                                                                                     |
| Tian 2020             | 23.80%                                                                                                                                                                                                                                                                                                                                                                                                                                                                                                                                                           |
| Venkata 2020          | 23%                                                                                                                                                                                                                                                                                                                                                                                                                                                                                                                                                              |
| Wang 2020 (3)         | Overall pooled prevalence 9% (95% CI 6, 12), $I^2 65\%$<br>Pooled prevalence in moderately severe COVID patients: 7% (4, 10), $I^2 58.7\%$<br>Pooled prevalence in severe COVID patients: 17% (13, 21), $O^2 0\%$                                                                                                                                                                                                                                                                                                                                                |
| Zaki 2020             | 12% to 22%                                                                                                                                                                                                                                                                                                                                                                                                                                                                                                                                                       |
| Zhou 2020 (2) **      | Meta-analysis of the proportions of comorbidities in severe or fatal COVID-19 cases showed diabetes had a prevalence of 17%, 95% CI 15–20%.                                                                                                                                                                                                                                                                                                                                                                                                                      |

Table 6. Association between diabetes and severe outcomes with COVID-19<sup>4</sup>

| First author/Year | ICU admission and direction of effect                                                                                       |   | Mortality and direction of effect                                                                                                                                                                                                            |    | Other measures of severity <sup>5</sup> and direction of effect                                                                                                                                                     |    |
|-------------------|-----------------------------------------------------------------------------------------------------------------------------|---|----------------------------------------------------------------------------------------------------------------------------------------------------------------------------------------------------------------------------------------------|----|---------------------------------------------------------------------------------------------------------------------------------------------------------------------------------------------------------------------|----|
| Abdi 2020         | NR                                                                                                                          |   | Death rate higher among patients with both diabetes and COVID-19. No pooled data.                                                                                                                                                            |    | Severe symptoms higher among patients with both diabetes and COVID-19. No pooled data.                                                                                                                              |    |
| Aggarwal 2020     | NR                                                                                                                          |   | Diabetes in people not surviving COVID-19 versus those surviving COVID-19: <b>OR: 2.03 [95%CI: 1.29-3.20]</b> 4 studies, 307/618 died of which 96 (15.5%) had DM. I <sup>2</sup> =0%                                                         | ↑↑ | Diabetes in COVID-19 patients with or without severe disease: OR: <b>2.60 [95% CI: 1.96 to 3.45]</b> . 12 studies. 754/2564 severe cases where 265 (10.3%) have DM. I <sup>2</sup> =56% and not explored/explained. | ↑↑ |
| Aktar 2021        | NR                                                                                                                          |   | NR                                                                                                                                                                                                                                           |    | Composite severe disease/ICU admission/death: <b>OR 2.08 (95% CI 1.39, 3.1)</b> I <sup>2</sup> 46%, p value on Effer test 0.95, 11 studies, 2693 patients                                                           | ↑↑ |
| Alves 2021        | NR                                                                                                                          |   | <b>RR 1.9 (95%CI 1.53, 2.37)</b> I <sup>2</sup> =62.7%                                                                                                                                                                                       | ↑↑ | NR                                                                                                                                                                                                                  |    |
| Apicella 2020     | Reports estimates from 3 other reviews, all of which are included here. No new data.                                        |   | Reports data from 2 other reviews, both of which are included here. No new data. Also reports data from large primary studies in type 1 and 2 diabetes (Barron et al): N=23804, 32% T2D, OR 2.03 (1.97, 2.09); 1.5% T1D, OR 3.5 (3.15, 3.89) |    | NR                                                                                                                                                                                                                  |    |
| Ashkortab 2021    | NR                                                                                                                          |   | "multiple regression analysis showed that diabetes was significantly associated with mortality (r=0.91, p=0.01)"                                                                                                                             | ↑↑ | NR                                                                                                                                                                                                                  |    |
| Awortwe 2020      | Risk difference for ICU vs non-ICU <b>0.01 (-.33;0.34)</b> , p value 0.98, I <sup>2</sup> =84.8 (n studies/participants NR) | ↑ | Risk difference for surviving COVID-19 vs. not surviving: <b>0.14 [0.08; 0.19]</b> , p value (<00000.1), I <sup>2</sup> =21%. (n studies/participants NR)                                                                                    | ↑↑ | Risk difference for severe v mild (not defined): <b>0.08 (0.02 to 0.14)</b> , p=0.002, I <sup>2</sup> =56. (n studies/participants NR)                                                                              | ↑↑ |

<sup>4</sup> NR not reported. \*\* higher quality (6 or 7 yes or partial yes on AMSTAR-2). Bold=pooled estimates. ↑ increased risk in PWD, not statistically significant; ↑↑ statistically significant increased risk in PWD; ↓ lower risk in PWD, not statistically significant

<sup>5</sup> Severity as per definitions of individual study authors unless otherwise specified

| First author/Year | ICU admission and direction of effect                                               |    | Mortality and direction of effect                                                                                                                                                                                                                        |    | Other measures of severity <sup>5</sup> and direction of effect                                                                                                                                                                                                                                |    |
|-------------------|-------------------------------------------------------------------------------------|----|----------------------------------------------------------------------------------------------------------------------------------------------------------------------------------------------------------------------------------------------------------|----|------------------------------------------------------------------------------------------------------------------------------------------------------------------------------------------------------------------------------------------------------------------------------------------------|----|
| Bae 2021          | NR                                                                                  |    | <b>OR 2.11</b> (95% CI 1.63, 2.73)                                                                                                                                                                                                                       | ↑↑ | “severe disease” <b>OR 2.47</b> (95% CI 1.86, 3.27)                                                                                                                                                                                                                                            | ↑↑ |
| Bajgain 2020      | NR                                                                                  |    | 66 fatal, 172 non-fatal with diabetes. In studies showing only fatal cases: 33.2% fatality for diabetes and Covid-19                                                                                                                                     |    | NR                                                                                                                                                                                                                                                                                             |    |
| Barrera 2020      | Unadjusted RR, 3 studies, N=8890, <b>RR 1.96 (1.19, 3.22)</b> , I <sup>2</sup> =80% | ↑↑ | Unadjusted RR, 4 studies, N=2058, <b>RR 2.78 (1.39, 5.58)</b> , I <sup>2</sup> =75%                                                                                                                                                                      | ↑↑ | Unadjusted RR for severe COVID-19 (not defined): <b>1.50, 95% CI 0.90 to 2.50</b> . I <sup>2</sup> =74%, 6 studies, n=1991                                                                                                                                                                     | ↑  |
| Bepouka 2022      | NR                                                                                  |    | <b>OR 1.39 (95% CI 1.02, 1.76)</b> , I <sup>2</sup> =0.3%                                                                                                                                                                                                | ↑↑ | NR                                                                                                                                                                                                                                                                                             |    |
| Bradley 2022      | NR                                                                                  |    | <b>OR 2.44 (95% CI 1.93, 3.09)</b> , I <sup>2</sup> =54.6%                                                                                                                                                                                               | ↑↑ | ‘Severity’ <b>OR 3.39 (95% CI 2.14, 5.37)</b> , I <sup>2</sup> =77.6%                                                                                                                                                                                                                          | ↑↑ |
| Chen 2022 (1)     | <b>OR 2.2</b> (95%CI 1.35, 3.59), I <sup>2</sup> =58.7%, 10 studies, 3003 patients  | ↑↑ | NR                                                                                                                                                                                                                                                       |    | NR                                                                                                                                                                                                                                                                                             |    |
| Cheng 2021        | NR                                                                                  |    | NR                                                                                                                                                                                                                                                       |    | Severity: <b>OR 1.64 (95% CI 1.3, 2.08)</b> , I <sup>2</sup> 60.4%                                                                                                                                                                                                                             | ↑↑ |
| Chidambaram 2020  | NR                                                                                  |    | PWD in those who died versus those who survived: <b>RR 1.59 [1.41–1.78]</b> . 27 studies, n=16263, I <sup>2</sup> =23                                                                                                                                    | ↑↑ | PWD in severe versus non severe cases: <b>OR 2.09, 95% CI 1.66 to 2.64</b> , I <sup>2</sup> =40%, 36 studies, n=7552                                                                                                                                                                           | ↑↑ |
| Choi 2022         | NR                                                                                  |    | NR                                                                                                                                                                                                                                                       |    | RR for severe disease (ICU/death) <b>2.26 (95%CI 1.95, 2.62)</b> , I <sup>2</sup> =0%, 4 studies, 5233 patients<br>Separate analysis in children with diabetes: children with diabetes had a higher risk of severe COVID-19 than those without diabetes ( <b>RR, 2.26; 95% CI, 1.95–2.62</b> ) | ↑↑ |
| Chowdhury 2020    | NR                                                                                  |    | Only reports data from Barron et al primary studies: 3.50 (3.15–3.89) odds of dying in hospital with COVID-19 in PWD compared with those without diabetes which was attenuated to 2.86 when also adjusted for previous hospital admissions with coronary |    | NR                                                                                                                                                                                                                                                                                             |    |

| First author/Year       | ICU admission and direction of effect | Mortality and direction of effect                                                                                                                                                                                                 | Other measures of severity <sup>5</sup> and direction of effect                                                                                                                                                                                                                                                                 |
|-------------------------|---------------------------------------|-----------------------------------------------------------------------------------------------------------------------------------------------------------------------------------------------------------------------------------|---------------------------------------------------------------------------------------------------------------------------------------------------------------------------------------------------------------------------------------------------------------------------------------------------------------------------------|
|                         |                                       | heart disease, cerebrovascular disease, or heart failure                                                                                                                                                                          |                                                                                                                                                                                                                                                                                                                                 |
| Corona 2021             | NR                                    | <b>OR 1.85 (95% CI 1.36, 2.51)</b><br>“For DM the adjusted relationship endpoint with mortality rate was $r=0.187$ , $p=0.001$ (adjusted by age, sex, associated morbidities)”                                                    | ↑↑ NR                                                                                                                                                                                                                                                                                                                           |
| Costa 2020              | NR                                    | Report results from 3 individual studies (no synthesis), all of which show greater risk in PWD. Cite Chinese CFR of 7.3% in PWD compared to 2.3% in total population.                                                             | NR                                                                                                                                                                                                                                                                                                                              |
| Damayanthi 2021         | NR                                    | <b>OR 1.31 (95% CI 0.22, 7.83)</b> , $I^2=96\%$ , 3 studies, 10059 older people with COVID-19                                                                                                                                     | ↑ NR                                                                                                                                                                                                                                                                                                                            |
| de Almeida-Pititto 2020 | NR                                    | 10 studies, 4247 patients, 532 PWD. Compared diabetes rate in people who died versus people who survived. <b>OR 2.50 (95% CI 1.74–3.59)</b> . Random effects model ( $I^2=50.72$ ; $p=0.032$ ). No publication bias was detected. | ↑↑ Severity (defined as ICU admission or need for mechanical ventilation or low O <sub>2</sub> saturation < 90%): 18 studies, 4305 patients, 564 PWD. Compared diabetes rate in severe v non-severe. <b>OR 2.35 (95% CI 1.80–3.06)</b> , Random effects model ( $I^2=34.78$ ; $p=0.073$ ), with no significant publication bias |
| Del Sole 2020           | NR                                    | NR                                                                                                                                                                                                                                | Severity (ARDS, ICU admission, death): <b>OR 2.78 (95% CI 2.09 to 7.72)</b> , 10 studies, $n=2794$ . $I^2$ NR                                                                                                                                                                                                                   |
| Deravi 2020             | NR                                    | NR                                                                                                                                                                                                                                | Individuals with diabetes mellitus and hypertension are reported to be at higher risks for the late viral clearance of the coronavirus, and the worsened prognosis in SARS, MERS and COVID-19 infections.                                                                                                                       |

| First author/Year | ICU admission and direction of effect                                                                                                                                                   |    | Mortality and direction of effect                                                                                                                                                                                                                                    |    | Other measures of severity <sup>5</sup> and direction of effect                                                                                                                                                                                                                                        |    |
|-------------------|-----------------------------------------------------------------------------------------------------------------------------------------------------------------------------------------|----|----------------------------------------------------------------------------------------------------------------------------------------------------------------------------------------------------------------------------------------------------------------------|----|--------------------------------------------------------------------------------------------------------------------------------------------------------------------------------------------------------------------------------------------------------------------------------------------------------|----|
| Deshmukh 2020     | NR                                                                                                                                                                                      |    | Narrative only. "These reports indicate that severe or critically ill COVID-19 patients with concurrent hypertension, diabetes and cardiovascular disease have a significantly higher risk of mortality and require special attention during their hospitalization." |    | NR                                                                                                                                                                                                                                                                                                     |    |
| Dessie 2021       | NR                                                                                                                                                                                      |    | <b>OR 1.52 (95%CI 1.36, 1.69)</b> , I <sup>2</sup> =78.9%, 13 studies                                                                                                                                                                                                | ↑↑ | NR                                                                                                                                                                                                                                                                                                     |    |
| Dhar 2021         | NR                                                                                                                                                                                      |    | NR                                                                                                                                                                                                                                                                   |    | 'Severe disease' <b>RR 1.52 (95% CI 1.25, 1.85)</b> , I <sup>2</sup> 86.6%, Egger test p=0.0017                                                                                                                                                                                                        | ↑↑ |
| Du 2020           | Diabetes was not found to be significantly associated with admission to ICU ( <b>RR = 1.16, 95%CI: 0.15-9.11</b> ). 2 studies, n=1631. I <sup>2</sup> =78%. Suspected publication bias. | ↑  | Compared with patients without diabetes, the risk of death ( <b>RR = 3.16, 95%CI: 2.64-3.78</b> , I <sup>2</sup> = 34%) was higher in COVID-19 patients with diabetes. No evidence of publication bias. 4 studies, n=46,654                                          | ↑↑ | Compared with patients without diabetes, the risks of severe cases [risk ratio (RR) = <b>2.13, 95%CI: 1.76-2.56</b> , I <sup>2</sup> = 49%] was higher in COVID-19 patients with diabetes. No evidence of publication bias. 7 studies, n=2662                                                          | ↑↑ |
| Du 2021           | NR                                                                                                                                                                                      |    | <b>OR 2.6 (95% CI 2.03, 3.34)</b> , I <sup>2</sup> =9%, 9 studies                                                                                                                                                                                                    | ↑↑ | "Severe disease" <b>OR 3.27 (95% CI 2.24, 4.79)</b> , I <sup>2</sup> =57%, 10 studies                                                                                                                                                                                                                  | ↑↑ |
| Espinosa 2020**   | NR                                                                                                                                                                                      |    | 19% prevalence of PWD within deaths with COVID-19, 95% CI (16-22), number of studies NS, no comparisons made                                                                                                                                                         |    | 17% prevalence of PWD within ICU admission with COVID-19, 95% CI (15-19), number of studies NS, no comparisons made                                                                                                                                                                                    |    |
| Fadini 2020       | NR                                                                                                                                                                                      |    | NR                                                                                                                                                                                                                                                                   |    | Based on these data, we conclude that diabetes may not increase the risk of SARS-CoV-2 infection but can worsen the outcome of this new coronavirus disease.                                                                                                                                           |    |
| Fang 2020**       | 5 studies, with 3747 total cases, <b>RR 1.88 (1.10-3.23)</b> , I <sup>2</sup> =51%. Calculated as rates of diabetes in people in ICU versus those not in ICU.                           | ↑↑ | Using 10 studies, with 4748 cases, the RR of death with COVID-19 and co-morbid diabetes is as follows: <b>RR 1.75 (1.27-2.41)</b> , I <sup>2</sup> =23%                                                                                                              | ↑↑ | Severity (American Thoracic Society guidelines for community-acquired pneumonia or the New Coronavirus Pneumonia Prevention and Control Guidelines of China): <b>RR 1.95 (1.60 to 2.36)</b> . Data from 23 studies, n=7739, I <sup>2</sup> =43%. Statistically and clinically significant increases in | ↑↑ |

| First author/Year | ICU admission and direction of effect                                    |    | Mortality and direction of effect                                                                                                     |    | Other measures of severity <sup>5</sup> and direction of effect                                                                                                                                                                                                                                            |    |
|-------------------|--------------------------------------------------------------------------|----|---------------------------------------------------------------------------------------------------------------------------------------|----|------------------------------------------------------------------------------------------------------------------------------------------------------------------------------------------------------------------------------------------------------------------------------------------------------------|----|
|                   |                                                                          |    |                                                                                                                                       |    | risk for ARDS and invasive ventilation also found in pooled data.                                                                                                                                                                                                                                          |    |
| Figliozi 2020**   | NR                                                                       |    | NR                                                                                                                                    |    | “Adverse prognosis” composite (death, severe COVID-19 infection, hospitalization in ICU and/or use of mechanical ventilation and progression of the disease): <b>OR 2.34, 95% CI 1.64 to 3.33</b> , I <sup>2</sup> =80%, n=15953, 34 studies.                                                              | ↑↑ |
| Flaherty 2020     | NR                                                                       |    | NR                                                                                                                                    |    | Narrative only. “Patients with diabetes have up to a 50% greater chance of a fatal outcome from COVID-19 than non-diabetic infected individuals”                                                                                                                                                           |    |
| Gaba 2022**       | <b>OR 2.79</b> (95% CI 1.79, 4.34), I <sup>2</sup> =0%, 5 studies, n=611 | ↑↑ | <b>OR 2.46 (95% CI 1.68, 3.58)</b> , I <sup>2</sup> =62%, 12 studies                                                                  | ↑↑ | NR                                                                                                                                                                                                                                                                                                         |    |
| Giri 2021         | NR                                                                       |    | NR                                                                                                                                    |    | ‘Severe disease’ <b>OR 3.15 (95% CI 2.39, 4.15)</b> , I <sup>2</sup> 49%, 10 studies                                                                                                                                                                                                                       | ↑↑ |
| Giri 2022         | NR                                                                       |    | NR                                                                                                                                    |    | ‘Severe disease’ <b>OR 2.04 (95% CI 1.67, 2.5)</b> , I <sup>2</sup> 55%, 37 studies                                                                                                                                                                                                                        | ↑↑ |
| Gold 2020         | NR                                                                       |    | Diabetes was more prevalent among fatal cases [24.89% (95%CI: 18.80%, 32.16%)] compared to total cases [9.65% (95%CI: 6.83%, 13.48%)] |    | NR                                                                                                                                                                                                                                                                                                         |    |
| Guler 2020        | NR                                                                       |    | Narrative only, discusses increased risk as per Costa 2020 (cite increased CFR in PWD)                                                |    | NR                                                                                                                                                                                                                                                                                                         |    |
| Gupta 2021        | NR                                                                       |    | <b>OR 1.83 (95% CI 1.61, 2.05)</b>                                                                                                    | ↑↑ | NR                                                                                                                                                                                                                                                                                                         |    |
| Guo 2020          | NR                                                                       |    | NR                                                                                                                                    |    | Severity (indication of respiratory rate >30 breaths/min, or SpO <sub>2</sub> <93% on room air, or PaO <sub>2</sub> /FiO <sub>2</sub> ≤300 mmHg, or critical complication (respiratory failure, septic shock, and or multiple organ dysfunction/failure) or death). Nine studies, 1070/8807 with diabetes, | ↑↑ |



| First author/Year   | ICU admission and direction of effect                                                                    |    | Mortality and direction of effect                                                                                                                                          |    | Other measures of severity <sup>5</sup> and direction of effect                                                                                                                                                                                                                                                                                                                                                                                                                                                                                                                                                                                                                                                                                                                        |    |
|---------------------|----------------------------------------------------------------------------------------------------------|----|----------------------------------------------------------------------------------------------------------------------------------------------------------------------------|----|----------------------------------------------------------------------------------------------------------------------------------------------------------------------------------------------------------------------------------------------------------------------------------------------------------------------------------------------------------------------------------------------------------------------------------------------------------------------------------------------------------------------------------------------------------------------------------------------------------------------------------------------------------------------------------------------------------------------------------------------------------------------------------------|----|
|                     |                                                                                                          |    |                                                                                                                                                                            |    | pooled <b>RR 2.96 (95% CI: 2.31–3.79)</b> ; $p < 0.001$ ), I <sup>2</sup> 23%. No evidence of publication bias                                                                                                                                                                                                                                                                                                                                                                                                                                                                                                                                                                                                                                                                         |    |
| Hartmann-Boyce 2020 |                                                                                                          |    | Narrative only, cite data showing higher risk of death across individual studies                                                                                           |    | "...current data suggest that COVID-19 is associated with worse outcomes in PWD."                                                                                                                                                                                                                                                                                                                                                                                                                                                                                                                                                                                                                                                                                                      |    |
| Hoang 2021          | <b>RR 2.44, 95% CI 1.66 to 3.6</b> , I <sup>2</sup> =45%, 4 studies                                      | ↑↑ | NR                                                                                                                                                                         |    | 'Severe infection': <b>RR 2.01 (1.7, 2.39)</b> , I <sup>2</sup> 51.1%, 13 studies                                                                                                                                                                                                                                                                                                                                                                                                                                                                                                                                                                                                                                                                                                      | ↑↑ |
| Honardoost 2021     | NR                                                                                                       |    | NR                                                                                                                                                                         |    | 'Severity': <b>OR 2.61 (95% CI 2.02, 3.3)</b> , I <sup>2</sup> 30.5%, 26 studies                                                                                                                                                                                                                                                                                                                                                                                                                                                                                                                                                                                                                                                                                                       | ↑↑ |
| Hu 2020             | NR                                                                                                       |    | No comparisons. Within PWD, the risks of severity and mortality rate ranged from 12.6 to 23.5% and from 2.0 to 4.4%, with pooled estimates at 18.0 and 3.2%, respectively. |    | No comparisons. The percentage of severe cases (not defined but includes ARDS and acute cardiac injury) in diabetes was 44.5% (95CI 27.0–61.9 %)                                                                                                                                                                                                                                                                                                                                                                                                                                                                                                                                                                                                                                       |    |
| Hu 2021             | <b>OR 1.61</b> (1.043, 1.043) <sup>6</sup> , I <sup>2</sup> 76.8% (number of studies and n not reported) | ↑↑ | NR                                                                                                                                                                         |    | NR                                                                                                                                                                                                                                                                                                                                                                                                                                                                                                                                                                                                                                                                                                                                                                                     |    |
| Huang 2020          | <b>RR 1.47 [0.38, 5.67]</b> , $p=0.57$ ; I <sup>2</sup> =63%. 10 studies, n=1985                         | ↑  | <b>RR 2.12 [1.44, 3.11]</b> , $p<0.001$ ; I <sup>2</sup> : 72%. 10 studies, n=1985                                                                                         | ↑↑ | <i>Severe COVID</i> ((1) respiratory distress (>30 breaths per min); (2) oxygen saturation at rest <93%; (3) ratio of partial pressure of arterial oxygen (PaO <sub>2</sub> ) to fractional concentration of oxygen inspired air (fiO <sub>2</sub> ) <300 mmHg; or (4) critical complication (respiratory failure, septic shock, and or multiple organ dysfunction/failure): <b>(RR 2.45 [1.79, 3.35])</b> , $p<0.001$ ; I <sup>2</sup> : 45%, 13 studies, n=3561)<br><i>Composite poor outcome</i> (including mortality, severe COVID-19, acute respiratory distress syndrome (ARDS), need for intensive care unit (ICU) care, and disease progression): <b>RR 2.38 [1.88, 3.03]</b> , $p<0.001$ ; I <sup>2</sup> : 62%, $p<0.001$ ). The funnel-plot analysis showed a qualitatively | ↑↑ |

<sup>6</sup> Note apparent error in CI reported in paper

| First author/Year | ICU admission and direction of effect                                                                                                                                                                                                       |    | Mortality and direction of effect                                                                                                                                                                                                               |    | Other measures of severity <sup>5</sup> and direction of effect                                                                                                                                                                                                                                                                                               |    |
|-------------------|---------------------------------------------------------------------------------------------------------------------------------------------------------------------------------------------------------------------------------------------|----|-------------------------------------------------------------------------------------------------------------------------------------------------------------------------------------------------------------------------------------------------|----|---------------------------------------------------------------------------------------------------------------------------------------------------------------------------------------------------------------------------------------------------------------------------------------------------------------------------------------------------------------|----|
|                   |                                                                                                                                                                                                                                             |    |                                                                                                                                                                                                                                                 |    | symmetrical inverted funnel-plot for the association between DM and composite poor outcome.                                                                                                                                                                                                                                                                   |    |
| Hussain 2020      | The risk of ICU admission rate was significantly higher in COVID-19 patients with diabetes as compared to COVID-19 patients without diabetes with a pooled risk ratio of <b>1.88 (1.20- 2.93)</b> . 5 studies, n=7484, I <sup>2</sup> =75%. | ↑↑ | Mortality risk was found to be significantly higher in COVID-19 patients with diabetes as compared to COVID-19 patients without diabetes with a pooled risk ratio of <b>1.61 (95% CI: 1.16-2.25)</b> . I <sup>2</sup> =93%. 11 studies, n=7093. | ↑↑ | NR                                                                                                                                                                                                                                                                                                                                                            |    |
| Izcovich 2020**   | NR                                                                                                                                                                                                                                          |    | 13.6% with diabetes, 7.9% without. OR <b>1.84 (1.61-2.1)</b> . n=30303, 52 studies, I <sup>2</sup> 33%. High certainty evidence according to GRADE. Estimated absolute risks: 5.6% increase in mortality. Between 4.3% more and 7% more.        | ↑↑ | “Severe COVID-19 disease” (severity as reported by primary study authors, or ICU requirement, invasive mechanical ventilation, or ARDs): <b>OR 2.51 (2.2-2.87)</b> . n=21381, 97 studies. I <sup>2</sup> = 32%. High certainty evidence according to GRADE. Estimated absolute risks: 13.2% increase severe COVID-19 disease. Between 11% more and 15.5% more | ↑↑ |
| Javanmardi 2020   | NR                                                                                                                                                                                                                                          |    | No comparison. 26% (21-31%) of diabetes in those dying with COVID-19.                                                                                                                                                                           |    | NR                                                                                                                                                                                                                                                                                                                                                            |    |
| Jindal 2022       | NR                                                                                                                                                                                                                                          |    | <b>OR 3.7 (95% CI 2.6, 5.28)</b> , I <sup>2</sup> =62.6%, 10 studies                                                                                                                                                                            | ↑↑ | NR                                                                                                                                                                                                                                                                                                                                                            |    |
| Kaminska 2021     | NR                                                                                                                                                                                                                                          |    | <b>OR 2.39 (95%CI 1.65, 3.64)</b> , I <sup>2</sup> =62%, 14 studies                                                                                                                                                                             | ↑↑ | Severe disease <b>OR 1.43 (95% CI 0.82, 2.5)</b> , I <sup>2</sup> =85%, 6 studies                                                                                                                                                                                                                                                                             | ↑  |
| Kandil 2021       | NR                                                                                                                                                                                                                                          |    | <b>OR 1.87 (95%CI 1.51, 2.31)</b> , I <sup>2</sup> =77.9%, 15 studies                                                                                                                                                                           | ↑↑ |                                                                                                                                                                                                                                                                                                                                                               |    |
| Khan 2020         | NR                                                                                                                                                                                                                                          |    | Not calculated for diabetes specifically. For all immune and metabolic disorders (OR = 2.46, 95% CI = 2.03-2.85)                                                                                                                                |    | NR                                                                                                                                                                                                                                                                                                                                                            |    |

| First author/Year | ICU admission and direction of effect                                              |  | Mortality and direction of effect                                                                                                                                                                                                                             |    | Other measures of severity <sup>5</sup> and direction of effect                                                                                                                                                                                                                                                                                                                                                                                                                                                                                                    |    |
|-------------------|------------------------------------------------------------------------------------|--|---------------------------------------------------------------------------------------------------------------------------------------------------------------------------------------------------------------------------------------------------------------|----|--------------------------------------------------------------------------------------------------------------------------------------------------------------------------------------------------------------------------------------------------------------------------------------------------------------------------------------------------------------------------------------------------------------------------------------------------------------------------------------------------------------------------------------------------------------------|----|
| Kumar 2020 (1)**  | NR                                                                                 |  | Presence of diabetes was found to be significantly associated with mortality due to COVID-19 (pooled odds ratio <b>1.90 [95% CI: 1.37-2.64; p&lt;0.01]</b> ). Heterogeneity among the studies was low (I <sup>2</sup> =32%). 9 studies, total n not reported. | ↑↑ | Severity of disease: 24 studies. Endpoints: Pre-defined criteria (16 studies); ICU requirement versus no requirement (2 studies); invasive ventilation requirement versus no requirement (2 studies); progressive disease versus stable disease (2 studies); refractory disease versus responsive disease (1 study); and ARDS versus no ARDS (1 study). Presence of diabetes was found to be significantly associated with severe COVID-19 (pooled odds ratio <b>2.75[95% CI: 2.09-3.62; p&lt;0.01]</b> ) Heterogeneity - I <sup>2</sup> 63%. Total n not provided | ↑↑ |
| Kumar 2020 (2)    | NR                                                                                 |  | NR                                                                                                                                                                                                                                                            |    | Composite: 'severe clinical course': (1. requiring ICU care; or 2. developing ARDS, shock, respiratory failure, or those requiring mechanical ventilation; 3. categorized as severe or critical groups according to the diagnostic and treatment guideline for SARS-CoV-2 issued by the National Health Commission of the People's Republic of China (version 3-5); or 4. not surviving.). <b>OR 3.11 (95% CI: 1.99-4.88)</b> . I <sup>2</sup> of 48%; 14 studies.                                                                                                 | ↑↑ |
| Kumar 2021        | NR                                                                                 |  | NR                                                                                                                                                                                                                                                            |    | "Severe/critical disease" <b>RR 2.06 (95% CI 1.52, 2.79)</b> , I <sup>2</sup> 76.9%, 19 studies                                                                                                                                                                                                                                                                                                                                                                                                                                                                    | ↑↑ |
| Li 2020 (1)       | NR                                                                                 |  | Non-survivors of COVID-19 were significantly more likely to have diabetes than survivors (24.8%, 95% CI 18.7-32.0 vs. 13.9%, 95 % CI 10.5-18.1, p=0.003)                                                                                                      |    | NR                                                                                                                                                                                                                                                                                                                                                                                                                                                                                                                                                                 |    |
| Li 2020 (3)       | Diabetes accounted for 11.7% of ICU/severe cases, but 4.0% of non-ICU/severe cases |  | NR                                                                                                                                                                                                                                                            |    | "The result indicated a higher proportion of diabetes in ICU/severe patients but without statistical significance <b>RR = 2.21, 95% CI (0.88, 5.57)</b> . I <sup>2</sup> =67%. 5 studies, n=1514                                                                                                                                                                                                                                                                                                                                                                   | ↑  |

| First author/Year | ICU admission and direction of effect                                                               |   | Mortality and direction of effect                                                                                                                                                                                                                  |    | Other measures of severity <sup>5</sup> and direction of effect                                                                                                                                                                                                                                              |    |
|-------------------|-----------------------------------------------------------------------------------------------------|---|----------------------------------------------------------------------------------------------------------------------------------------------------------------------------------------------------------------------------------------------------|----|--------------------------------------------------------------------------------------------------------------------------------------------------------------------------------------------------------------------------------------------------------------------------------------------------------------|----|
| Li 2021 (1)       | NR                                                                                                  |   | NR                                                                                                                                                                                                                                                 |    | 'Severe disease' <b>OR 2.4 (95% CI 1.98, 2.91)</b> , I2 55.6%, 39 studies. "No evidence of publication bias"                                                                                                                                                                                                 | ↑↑ |
| Li 2021 (2)**     | ICU admission diabetes versus non diabetes: OR 2.24 (0.84, 5.95), I2 91%, n not reported, 3 studies | ↑ | <b>OR 1.25 (95% CI 1.11, 1.4)</b> , I2=16.4%, 11 studies                                                                                                                                                                                           | ↑↑ | NR                                                                                                                                                                                                                                                                                                           |    |
| Liu 2020 (1)      | NR                                                                                                  |   | NR                                                                                                                                                                                                                                                 |    | "Increased risk of disease severity": <b>OR 2.61, 95% CI 1.93 to 3.52</b> , I2=26.7%; 10 studies, n not reported                                                                                                                                                                                             | ↑↑ |
| Lu 2020           | NR                                                                                                  |   | <b>OR 2.63, 95% CI 1.45, 4.76</b> . 5 studies, n=2307. I2 NR                                                                                                                                                                                       | ↑↑ | NR                                                                                                                                                                                                                                                                                                           |    |
| Luo 2020**        | NR                                                                                                  |   | In-hospital mortality <b>OR 2.09, 95% CI: 1.80-2.42</b> (do not report total n, studies, or I2 for this analysis as part of larger analysis (124 studies))                                                                                         | ↑↑ | <b>OR 2.54, 95% CI: 1.89-3.41</b> (do not report total n, studies, or I2 for this analysis as part of larger analysis (124 studies))                                                                                                                                                                         | ↑↑ |
| Mahumud 2020      | NR                                                                                                  |   | NR                                                                                                                                                                                                                                                 |    | Chronic comorbid conditions (e.g., hypertension, diabetes mellitus, cardiovascular disease, respiratory disease, and other chronic diseases) were identified as high risk factors.                                                                                                                           |    |
| Mantovani 2020    | NR                                                                                                  |   | Pre-existing diabetes was significantly associated with a ~three-fold greater risk of in-hospital mortality associated with COVID-19 (n=15 studies included random-effects <b>OR 2.68, 95% CI 2.09-3.44</b> ; I2=46.7%). Publication bias unlikely | ↑↑ | Severe disease: Patients with established diabetes had an approximate two-fold greater risk of severe/critical COVID-19 illness compared to their counterparts without diabetes (n=22 studies included; random-effects odds ratio <b>2.10, 95%CI 1.71-2.57</b> ; I2=41.5%). Publication bias judged unlikely | ↑↑ |
| Mehraeen 2020     | NR                                                                                                  |   | <b>OR 1.34; 95% CI: 1.10–1.64</b> (114 studies, 310,494 participants, I2 NR)                                                                                                                                                                       | ↑↑ | NR                                                                                                                                                                                                                                                                                                           |    |
| Meng 2021         | NR                                                                                                  |   | NR                                                                                                                                                                                                                                                 |    | "Patients with diabetes (pooled positive likelihood 2.82, 95% CI: 1.95, 4.1) exhibited increased probability of progressing to severe illness."                                                                                                                                                              | ↑↑ |

| First author/Year | ICU admission and direction of effect | Mortality and direction of effect                                                                                                                                                                                                                                                                                                                                                                                            | Other measures of severity <sup>5</sup> and direction of effect                             |
|-------------------|---------------------------------------|------------------------------------------------------------------------------------------------------------------------------------------------------------------------------------------------------------------------------------------------------------------------------------------------------------------------------------------------------------------------------------------------------------------------------|---------------------------------------------------------------------------------------------|
| Mesas 2020**      | NR                                    | <b>OR 2.12 (1.79, 2.52)</b> ), p value <0.001 and I2 77.9. 38 studies, n=25498                                                                                                                                                                                                                                                                                                                                               | ↑↑ NR                                                                                       |
| Miller 2020       | NR                                    | We subsequently undertook a meta-regression analysis to identify possible sources of study-to-study variability in this [mortality] rate. Among the demographics, risk factors, and symptoms, the only variable that statistically significantly influenced the mortality rate was the prevalence of DM, where each 1% increase in DM prevalence was associated with a 1.5% absolute increase in the mortality rate (P<.001) | NR                                                                                          |
| Mirjalli 2021     | NR                                    | <b>OR 5.49 (95%CI 4.48, 6.71)</b> , I2=0%, 8 studies                                                                                                                                                                                                                                                                                                                                                                         | ↑↑ NR                                                                                       |
| Mishra 2021       | NR                                    | <b>OR 1.9 (95%CI 1.5, 2.42)</b> , I2=0%, 13 studies, 4110 patients                                                                                                                                                                                                                                                                                                                                                           | ↑↑ 'Severe disease' <b>OR 2.07 (95%CI 1.44, 2.97)</b> , I2=39.5%, 13 studies, 2762 patients |
| Moula 2020        | NR                                    | Patients with diabetes had 1.59-fold higher chance of dying than patients without diabetes ( <b>RR: 1.59 [95% CI: 1.25, 2.02]</b> , p < 0.0001; 28 studies, total n not reported, I2 not reported)                                                                                                                                                                                                                           | ↑↑ NR                                                                                       |
| Mudatsir 2020**   | NR                                    | NR                                                                                                                                                                                                                                                                                                                                                                                                                           | <b>OR 2.10; 95% CI: 1.33, 3.34</b> (severity not defined). 17 studies, n=3120, I2=63%       |
| Nandy 2020        | NR                                    | Patients with diabetes mellitus had a higher risk of mortality than non-diabetic patients ( <b>OR 2.28 95 CI 1.40 to 5.55</b> ) (p = 0.004).                                                                                                                                                                                                                                                                                 | ↑↑ NR                                                                                       |
| Ng 2021           | NR                                    | <b>HR 1.94 (95% CI, 1.54 to 2.46)</b>                                                                                                                                                                                                                                                                                                                                                                                        | ↑↑ NR                                                                                       |
| Ng 2022**         | NR                                    | <b>OR 2.16 (95% CI 1.97–2.36)</b> , 40 studies, 18,979 patients, 3,791 with DM                                                                                                                                                                                                                                                                                                                                               | ↑↑ NR                                                                                       |

| First author/Year    | ICU admission and direction of effect                                                                                                               |   | Mortality and direction of effect                                                                                                                                                                                                                                                                   |    | Other measures of severity <sup>5</sup> and direction of effect                                                                                                                                                                                                                                                                                                                                                                                                                        |    |
|----------------------|-----------------------------------------------------------------------------------------------------------------------------------------------------|---|-----------------------------------------------------------------------------------------------------------------------------------------------------------------------------------------------------------------------------------------------------------------------------------------------------|----|----------------------------------------------------------------------------------------------------------------------------------------------------------------------------------------------------------------------------------------------------------------------------------------------------------------------------------------------------------------------------------------------------------------------------------------------------------------------------------------|----|
| Noor 2020            | NR                                                                                                                                                  |   | The prevalence of mortality among COVID-19 patients with diabetes was 49%. Pooled risk ratio <b>1.87 (1.23–2.84)</b> , test for overall affect 2.03, p value <0.001                                                                                                                                 | ↑↑ | NR                                                                                                                                                                                                                                                                                                                                                                                                                                                                                     |    |
| Pal 2020             | NR                                                                                                                                                  |   | The in-hospital mortality rate was 45% in PWD                                                                                                                                                                                                                                                       |    | NR                                                                                                                                                                                                                                                                                                                                                                                                                                                                                     |    |
| Palaiodimos 2020     | NR                                                                                                                                                  |   | In our meta-analysis of 14 studies, we found that patients with diabetes were associated with a higher risk of death compared with patients without diabetes, but with significant heterogeneity ( <b>OR 1.65; 95% CI 1.35–1.96</b> ; I <sup>2</sup> =77.4%). Possible presence of publication bias | ↑↑ | NR                                                                                                                                                                                                                                                                                                                                                                                                                                                                                     |    |
| Parohan 2020         | NR                                                                                                                                                  |   | OR <b>2.41, 95% CIs 1.05–5.51</b> , I <sup>2</sup> 93.6%,                                                                                                                                                                                                                                           | ↑↑ | NR                                                                                                                                                                                                                                                                                                                                                                                                                                                                                     |    |
| Parveen 2020         | 2 studies, 179 patients, 49 ICU admissions<br><b>OR: 0.78; 95% CI: 0.06–9.34; p = 0.842; I<sup>2</sup>: 75.9%</b><br>with substantial heterogeneity | ↓ | Odds of survival: 2 studies, 465 patients, 167 deaths. The pooled estimate ( <b>OR: 0.56; 95% CI: 0.35–0.90</b> ; p = 0.017; I <sup>2</sup> :0.0%) suggested that diabetes was significantly lower in the survivors                                                                                 | ↑↑ | 3 studies, 1374 patients, 271 severe (defined as having respiratory distress, RR>30 beats/minute in a resting state, a mean oxygen saturation of <93%, and an arterial blood oxygen partial pressure (PaO <sub>2</sub> )/oxygen concentration (FiO <sub>2</sub> ) <300 mmHg)<br>The pooled estimate of two cohort studies and one case-series suggested significant association between diabetes and severity ( <b>OR: 1.66; 95% CI: 1.20–2.30</b> ; p = 0.002; I <sup>2</sup> : 0.0%) | ↑↑ |
| Patel 2020 (2)       | NR                                                                                                                                                  |   | Meta-regression model: Mortality odds ratio <b>1.02 (0.94–1.11)</b> -age adjusted for diabetes                                                                                                                                                                                                      | ↑  | Diabetes was not found to be associated with need for invasive mechanical ventilation (IMV)                                                                                                                                                                                                                                                                                                                                                                                            |    |
| Pinedo-Torres 2020** | ICU admission, 1 study, N=138, prevalence 57.97% (95% CI 25.36 -111.03)                                                                             |   | Death, 2 studies, N=716, prevalence 96.33% (95% CI 61.36 -137.66), I <sup>2</sup> 0%                                                                                                                                                                                                                |    | NR                                                                                                                                                                                                                                                                                                                                                                                                                                                                                     |    |

| First author/Year         | ICU admission and direction of effect                                                                                                   |    | Mortality and direction of effect                                                                                                                                                    |    | Other measures of severity <sup>5</sup> and direction of effect                                                                                 |    |
|---------------------------|-----------------------------------------------------------------------------------------------------------------------------------------|----|--------------------------------------------------------------------------------------------------------------------------------------------------------------------------------------|----|-------------------------------------------------------------------------------------------------------------------------------------------------|----|
| Plasencia-Urizarri 2020** | NR                                                                                                                                      |    | NR                                                                                                                                                                                   |    | Severe clinical presentations: <b>OR: 3.53; 95 % CI: 2.79-4.47.</b> 13 studies, n not reported. I2=59%                                          | ↑↑ |
| Poly 2021 (2)             | NR                                                                                                                                      |    | <b>RR 1.19 (95% CI 1.07–1.32)</b>                                                                                                                                                    | ↑↑ | NR                                                                                                                                              |    |
| Qui 2020                  | NR                                                                                                                                      |    | The pooled prevalence of diabetes in COVID-19 death patients was estimated to be 22.2% (95% CI 19.30 ~ 25.10%). The heterogeneity of the study was low (I2 = 28.4%, P = 0.1519)      |    | NR                                                                                                                                              |    |
| Radwan 2020               | NR                                                                                                                                      |    | NR                                                                                                                                                                                   |    | “Severity” (intensive care unit (ICU) admission, mechanical ventilation and death): <b>OR=2.46, 95%CI=1.53-3.96</b> , 7 studies, n=1885, I2=31% | ↑↑ |
| Rahman 2021 (2)           | NR                                                                                                                                      |    | NR                                                                                                                                                                                   |    | “Diabetes is significantly associated with an increased severity of COVID-19 ( <b>RR = 1.57, 95% CI 1.25 to 1.98</b> ).”                        | ↑↑ |
| Rico-Martin 2021          | NR                                                                                                                                      |    | <b>OR 1.57 (95% CI 1.08-2.29)</b>                                                                                                                                                    | ↑↑ | NR                                                                                                                                              |    |
| Rod 2020                  | NR                                                                                                                                      |    | NR                                                                                                                                                                                   |    | No synthesis, but diabetes identified as one of main predictors of COVID-19 severity                                                            |    |
| Roncon 2020               | PWD had a significant increased risk of ICU admission ( <b>OR: 2.79, 95 % CI 1.85–4.22</b> , p < 0.0001, I2= 46 %), 4 studies, 240/1380 | ↑↑ | PWD had higher mortality risk ( <b>OR 3.21, 95 % CI 1.82–5.64</b> , p < 0.0001, I2= 16 %), 4 studies 214/354                                                                         | ↑↑ | NR                                                                                                                                              |    |
| Sacks 2020                | Narrative only, cites mixed evidence of increased risk                                                                                  |    | Narrative only, cites consistent evidence of increased risk                                                                                                                          |    | NR                                                                                                                                              |    |
| Saha 2021                 | NR                                                                                                                                      |    | “The weighted prevalence of mortality was 1.82-time higher in DM (20.0 %, 95 % CI: 15.0–26.0; I2, 96.8 %) than non-DM (11.0 %, 95 % CI: 6.0–16.0; I2, 99.32 %) hospitalized COVID-19 | ↑↑ | NR                                                                                                                                              |    |

| First author/Year | ICU admission and direction of effect |  | Mortality and direction of effect                                                                                                                                                                                                                                                              |    | Other measures of severity <sup>5</sup> and direction of effect                                                                                                    |    |
|-------------------|---------------------------------------|--|------------------------------------------------------------------------------------------------------------------------------------------------------------------------------------------------------------------------------------------------------------------------------------------------|----|--------------------------------------------------------------------------------------------------------------------------------------------------------------------|----|
|                   |                                       |  | patients: ES 0.20 (0.15, 0.26). An adjusted meta-regression model including sample size and COVID-19 severity as predictors depicted a 452% (p = 0.014) increased risk of mortality in DM patients with severe COVID-19 infection compared to the reference group"                             |    |                                                                                                                                                                    |    |
| Sahni 2021        | NR                                    |  | NR                                                                                                                                                                                                                                                                                             |    | The risk of critical or fatal COVID-19 infection was significantly increased with diabetes: <b>OR: 2.27, 95% CI: 1.87–2.74</b>                                     | ↑↑ |
| Sahu 2021         |                                       |  |                                                                                                                                                                                                                                                                                                |    | Diabetes was associated with significantly increased risk of severe disease ( <b>OR: 2.29, 95% CI: 1.56–3.39</b> )                                                 | ↑↑ |
| Saleh 2021        | NR                                    |  | "The SRR for death in patients with COVID-19 was <b>1.54 (95% CI 1.44 to 1.64, I2=92%, n=145, low certainty)</b> for diabetes compared with patients without"                                                                                                                                  | ↑↑ | NR                                                                                                                                                                 |    |
| Sayed 2020        | NR                                    |  | China observational report (1023 deaths/4462 confirmed cases) overall CFR 2.3%, CRF in people with diabetes 7.3%; USA 1122 patients in 88 hospitals, 38.5% had either DM or uncontrolled hyperglycaemia had "a more than 4 times higher mortality rate compared to no diabetes/hyperglycaemia" |    | NR                                                                                                                                                                 |    |
| Sepandi 2020      | NR                                    |  | Type 2 OR: <b>2.42(1.06-5.52)</b> , 9 studies, I2=90%. Number of participants NS.                                                                                                                                                                                                              | ↑↑ | NR                                                                                                                                                                 |    |
| Shang 2020        |                                       |  | 28 studies. COVID-19 patients with DM had higher mortality rate compared with those non-diabetic patients (28.5 vs. 13.3%, p<0.01).                                                                                                                                                            | ↑↑ | COVID-19 patients with DM had higher severe infection rate compared with those non-diabetic patients (21.4 vs.10.6%, p<0.01). DM was found to be associated with a | ↑↑ |



| First author/Year | ICU admission and direction of effect |  | Mortality and direction of effect                                                                                                                                                             |    | Other measures of severity <sup>5</sup> and direction of effect                                                                                                                                                                                                                   |    |
|-------------------|---------------------------------------|--|-----------------------------------------------------------------------------------------------------------------------------------------------------------------------------------------------|----|-----------------------------------------------------------------------------------------------------------------------------------------------------------------------------------------------------------------------------------------------------------------------------------|----|
|                   |                                       |  | COVID-19 patients with DM had a higher risk of death (pooled <b>OR 2.21, 95% CI: 1.83-2.66</b> , $p<0.001$ ; $I^2=50\%$ , $p<0.01$ ). No evidence of publication bias.                        |    | significantly greater risk of severe COVID-19 infection (pooled <b>OR 2.38, 95% CI: 2.05-2.78</b> , $p<0.001$ ; $I^2=39\%$ , $p<0.01$ ), 54 studies. No evidence of publication bias.                                                                                             |    |
| Shoar 2020        | NR                                    |  | (OR = <b>1.7, p = 0.03 95% CI 1.04, 2.78</b> ), $I^2=47\%$ . N studies/participants not reported for this analysis, 12 studies (n=3257) included overall                                      | ↑  | NR                                                                                                                                                                                                                                                                                |    |
| Shresthra 2021    | NR                                    |  | Mortality rate "16.03% among known DM patients (CI: 10.95-22.88, $I^2=54.35$ )"                                                                                                               |    | "The occurrence of adverse events among COVID-19 cases was 15.29% occurrence among non-diabetic patients (CI: 9.06-24.65, $I^2=84.47$ ); 20.69% among known DM patients (CI: 8.12-43.50, $I^2=90.14$ ), and 45.85% among those with new-onset DM (CI: 22.23-71.50, $I^2=94.21$ )" |    |
| Silviero 2021     | NR                                    |  | Diabetes associated with in hospital mortality; coefficient: <b>1.02; 95% CI 1.01–1.05</b> ; $p = 0.043$                                                                                      | ↑↑ | NR                                                                                                                                                                                                                                                                                |    |
| Singh 2020 (1)    | NR                                    |  | No new analyses; cites existing studies finding increased risk                                                                                                                                |    | NR                                                                                                                                                                                                                                                                                |    |
| Singh 2020 (2)**  | NR                                    |  | Estimated pooled RR of mortality from COVID-19 if you have a comorbidity compared to if you do not. <b>RR 1.83 95%CI 0.89,3.73</b> $p$ -value 0.100, 2 studies, total n not stated, $I^2=0\%$ | ↑  | <b>RR 2.11 [1.40, 3.19]</b> , 7 studies (total n not stated), $I^2=84.6\%$ , possible publication bias detected                                                                                                                                                                   | ↑↑ |
| Singh 2020 (3)    | NR                                    |  | Increased risk of mortality in patients with comorbidities however this is a literature review with no pooled effect data                                                                     |    | NR                                                                                                                                                                                                                                                                                |    |
| Ssentongo 2020**  | NR                                    |  | Risk of mortality in PWD compared to people without diabetes: <b>RR 1.48 [1.02 to 2.15]</b> , 16 studies, $I^2=84\%$ , n not reported                                                         | ↑↑ | NR                                                                                                                                                                                                                                                                                |    |

| First author/Year         | ICU admission and direction of effect                                                                 |   | Mortality and direction of effect                                                                                                                                                                                                                                                                                                           |    | Other measures of severity <sup>5</sup> and direction of effect                                                                                                                                           |    |
|---------------------------|-------------------------------------------------------------------------------------------------------|---|---------------------------------------------------------------------------------------------------------------------------------------------------------------------------------------------------------------------------------------------------------------------------------------------------------------------------------------------|----|-----------------------------------------------------------------------------------------------------------------------------------------------------------------------------------------------------------|----|
| Tadic 2020                | Narrative only, cites studies finding increased risk of admission to ICU                              |   | In most of the studies exists the trend toward higher prevalence of diabetes among non-survivors, but in majority of studies, it did not reach statistical significance due to the small sample size                                                                                                                                        |    | NR                                                                                                                                                                                                        |    |
| Tan 2020**                | Prevalence of Diabetes within COVID patients admitted to ICU/HDU: 26.6% (22.7-30.8), I2= 84, P < 0.01 |   | NR                                                                                                                                                                                                                                                                                                                                          |    | NR                                                                                                                                                                                                        |    |
| Taylor 2021               | NR                                                                                                    |   | Diabetes associated with significantly increased risk of ICU mortality: <b>OR 1.41 (95%CI 1.22–1.63)</b>                                                                                                                                                                                                                                    | ↑↑ | NR                                                                                                                                                                                                        |    |
| Tian 2020                 | NR                                                                                                    |   | Of 1103 that died from COVID-19, 31.2% had diabetes. Of 3212 that survived COVID-19, 21.2% had diabetes. OR (95% CI) = <b>1.97 (1.67-2.31)</b> , p<0.00001. 12 studies. I2 0%                                                                                                                                                               | ↑↑ | NR                                                                                                                                                                                                        |    |
| Tisminetsky 2022          | NR                                                                                                    |   | “Diabetes was associated with high case fatality rates”                                                                                                                                                                                                                                                                                     | ↑  | NR                                                                                                                                                                                                        |    |
| Treskova-Schwarzbach 2021 | NR                                                                                                    |   | Diabetes was associated with a statistically significant increased risk of death ( <b>HR 2.0 (95% CI 1.15–3.5)</b> )                                                                                                                                                                                                                        | ↑↑ | NR                                                                                                                                                                                                        |    |
| Vardavas 2022             | <b>OR 1.138 (0.816–1.585)</b> ; no further information provided                                       | ↑ | Diabetes was associated with significantly increased risk of mortality in the hospital setting: <b>OR 1.395 (95% CI 1.204–1.617)</b> ; high certainty evidence. There was no significant effect in ICU settings: <b>OR 0.989 (95% CI 0.704–1.39)</b> low certainty evidence; or in community settings: <b>OR 1.363 (95% CI 0.871–2.131)</b> | ↑↑ | (Composite outcome) “Diabetes was estimated to significantly increase the risk for ICU admission or death in the community setting ( <b>OR 1.374 (95%CI 1.235-1.528)</b> ); moderate certainty evidence.” | ↑↑ |

| First author/Year | ICU admission and direction of effect                                             |  | Mortality and direction of effect                                                                                                                                                                                                                        |    | Other measures of severity <sup>5</sup> and direction of effect                                                                                                                                                                                                                         |    |
|-------------------|-----------------------------------------------------------------------------------|--|----------------------------------------------------------------------------------------------------------------------------------------------------------------------------------------------------------------------------------------------------------|----|-----------------------------------------------------------------------------------------------------------------------------------------------------------------------------------------------------------------------------------------------------------------------------------------|----|
| Varikasuvu 2020** | NR                                                                                |  | Diabetic proportions were 259/879 and 429/3292 in mortal and survival groups of COVID-19...diabetes related significantly with COVID-19 disease mortality ( <b>OR = 2.52, 95% CI = 1.93–3.30</b> , Z = 6.79, p < 0.00001, I2 = 31%, p = 0.08) 22 studies | ↑↑ | The diabetic proportions were 750/2894 and 931/6203 in severe and non-severe groups of COVID-19 cases... diabetes related significantly with COVID-19 disease severity ( <b>OR=2.20, 95% CI=1.69–2.86</b> , Z = 5.82, p < 0.00001, I2 = 58%, p < 0.0001) Severe not defined. 35 studies | ↑↑ |
| Wang 2020 (2)**   | NR                                                                                |  | NR                                                                                                                                                                                                                                                       |    | 1558 patients with COVID-19 in 6 studies<br>Risk of exacerbation: <b>OR 2.47, 95% CI 1.67 to 3.66</b> , I2=39                                                                                                                                                                           | ↑↑ |
| Wingert 2021      | Reported only that it was 'uncertain' if diabetes increased risk of ICU admission |  | Reported "moderate association" between diabetes and COVID-19 mortality, with RR/OR ranging from 1.71 to 1.99                                                                                                                                            | ↑  | Assert "low certainty" of association between diabetes and "severe disease or mechanical ventilation"                                                                                                                                                                                   |    |
| Wu 2020           | NR                                                                                |  | <b>OR 1.75 (95% CI 1.31–2.36</b> ; P = 0.0002). 6 studies, n=1471, I2=5%                                                                                                                                                                                 | ↑↑ | NR                                                                                                                                                                                                                                                                                      |    |
| Wu 2021           | NR                                                                                |  | Diabetes was associated with significantly increased risk of mortality: <b>OR 2.14 (95% CI 1.76-2.60</b> , I2=37%, p<0.00001)                                                                                                                            | ↑↑ | NR                                                                                                                                                                                                                                                                                      |    |
| Xiang 2021        | NR                                                                                |  | Diabetes was associated with significantly increased risk of mortality: <b>OR 1.63 (95% CI 1.44-1.84</b> , I2=29.1%)                                                                                                                                     | ↑↑ | NR                                                                                                                                                                                                                                                                                      |    |
| Xie 2021          | NR                                                                                |  | NR                                                                                                                                                                                                                                                       |    | "Diabetes was significantly associated with increased severity of COVID-19 outcomes: <b>OR 2.46 [95% CI 1.77, 3.40]</b> <0.00001"                                                                                                                                                       | ↑↑ |
| Xu 2020           | NR                                                                                |  | NR                                                                                                                                                                                                                                                       |    | Narrative only, states PWD more likely to develop severe COVID-19                                                                                                                                                                                                                       |    |
| Yanai 2020        | NR                                                                                |  | NR                                                                                                                                                                                                                                                       |    | Metabolic syndrome and its components are significantly as-sociated with the susceptibility to SARS-CoV-2 infection and severity of COVID-19.                                                                                                                                           |    |

| First author/Year | ICU admission and direction of effect                                                  |    | Mortality and direction of effect                                                                                                            |    | Other measures of severity <sup>5</sup> and direction of effect                                                                                                         |    |
|-------------------|----------------------------------------------------------------------------------------|----|----------------------------------------------------------------------------------------------------------------------------------------------|----|-------------------------------------------------------------------------------------------------------------------------------------------------------------------------|----|
| Yang 2020         | NR                                                                                     |    | NR                                                                                                                                           |    | Diabetes in “severe” versus “non-severe” group: <b>OR 2.07, 95% CI 0.89 to 4.82</b> . 4 studies, total n not reported, I2 = 62%                                         | ↑  |
| Yin 2021 (1)      | NR                                                                                     |    | NR                                                                                                                                           |    | Note “the poor prognosis of COVID-19 in patients with diabetes is associated with severe illness, ICU treatment, death, and other adverse outcomes”                     |    |
| Yin 2021 (2)      | NR                                                                                     |    | NR                                                                                                                                           |    | Diabetes was found to significantly increase the ‘risk of disease exacerbation’: ( <b>OR = 2.49, 95% CI 2.10– 2.96</b> )                                                | ↑↑ |
| Zaki 2020         | NR                                                                                     |    | NR                                                                                                                                           |    | Diabetes, hypertension, and cholesterol levels possess an apparent relation to COVID-19 severity                                                                        |    |
| Zhao 2020 (1)     | NR                                                                                     |    | NR                                                                                                                                           |    | NR                                                                                                                                                                      |    |
| Zhao 2020 (2)     | ( <b>RR=1.26; 95% CI=0.11 to 14.42</b> ; P=0.85 I2=80%) 2 studies, n=179               | ↑  | NR                                                                                                                                           |    | NR                                                                                                                                                                      |    |
| Zheng 2020        | NR                                                                                     |    | NR                                                                                                                                           |    | Diabetes incidence significantly higher in “critical/mortal” patients compared to “non-critical” <b>OR 3.68, 95% CI 2.68 to 5.03</b> . 11 studies, I2=45%, total n 2579 | ↑↑ |
| Zheng-Hong 2021   | NR                                                                                     |    | Results showed a close relationship between diabetes and mortality of COVID-19, with a pooled <b>OR of 1.75 (95% CI 1.31–2.36; P=0.0002)</b> | ↑↑ | NR                                                                                                                                                                      |    |
| Zhou 2020 (1)     | NR                                                                                     |    | The death group had significantly higher proportions of patients with diabetes ( <b>OR=2.51, 95% CI: 1.86-3.35, P&lt;0.001 I2=87.32%</b> ).  | ↑↑ | NR                                                                                                                                                                      |    |
| Zhou 2020 (2)**   | 4 studies recorded ICU admission (a sample of 6652 patients, 1138 (17.1%) of whom were | ↑↑ | 5 studies compared the rates of comorbidities in survivors versus non-survivors, with a sample of 3436 patients, 1624 (47.3%) of whom died.  | ↑↑ | NR                                                                                                                                                                      |    |

| First author/Year | ICU admission and direction of effect                                                                                       |  | Mortality and direction of effect                                                                                                                                                                             |  | Other measures of severity <sup>5</sup> and direction of effect |  |
|-------------------|-----------------------------------------------------------------------------------------------------------------------------|--|---------------------------------------------------------------------------------------------------------------------------------------------------------------------------------------------------------------|--|-----------------------------------------------------------------|--|
|                   | classified as admitted to the ICU). Regarding diabetes, <b>OR (95% CI), 2.98 (1.49, 5.98)</b> , p=0.002 I <sup>2</sup> =48. |  | In subgroup analysis based on severe clinical outcomes associated with COVID-19, 4 studies used for diabetes (n not reported). <b>OR (95% CI), 2.08 (1.38, 3.15)</b> , P=0.001 I <sup>2</sup> =0.0%, Ph=0.728 |  |                                                                 |  |



## Figures

Figure 1. PRISMA diagram of study flow

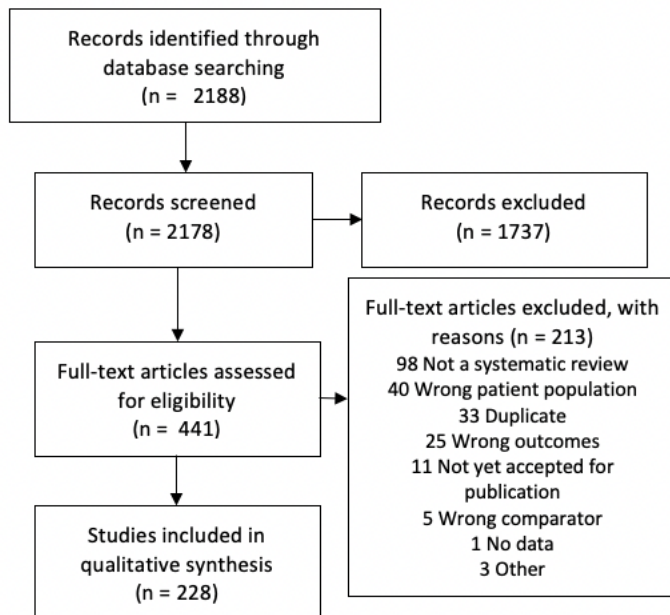

## Appendix 1. Search strategies

| MEDLINE |                                                                                                                                                                                                                                                                                                                                                                                                                                   |
|---------|-----------------------------------------------------------------------------------------------------------------------------------------------------------------------------------------------------------------------------------------------------------------------------------------------------------------------------------------------------------------------------------------------------------------------------------|
| 1       | exp Coronavirus/                                                                                                                                                                                                                                                                                                                                                                                                                  |
| 2       | exp Coronavirus Infections/                                                                                                                                                                                                                                                                                                                                                                                                       |
| 3       | (coronavirus* or corona virus* or OC43 or NL63 or 229E or HKU1 or HCoV* or ncov* or covid* or sars-cov* or sarscov* or Sars-coronavirus* or Severe Acute Respiratory Syndrome Coronavirus*).mp.                                                                                                                                                                                                                                   |
| 4       | ((pneumonia or covid* or coronavirus* or corona virus* or ncov* or 2019-ncov or sars*).mp. or exp pneumonia/) and Wuhan.mp.                                                                                                                                                                                                                                                                                                       |
| 5       | (2019-ncov or ncov19 or ncov-19 or 2019-novel CoV or sars-cov2 or sars-cov-2 or sarscov2 or sarscov-2 or Sars-coronavirus2 or Sars-coronavirus-2 or SARS-like coronavirus* or coronavirus-19 or covid19 or covid-19 or covid 2019 or ((novel or new or nouveau) adj2 (CoV on nCoV or covid or coronavirus* or corona virus or Pandemi*2)) or ((covid or covid19 or covid-19) and pandemic*2) or (coronavirus* and pneumonia)).mp. |
| 6       | COVID-19.rx,px,ox. or severe acute respiratory syndrome coronavirus 2.os.                                                                                                                                                                                                                                                                                                                                                         |
| 7       | 1 or 2 or 3 or 4 or 5 or 6                                                                                                                                                                                                                                                                                                                                                                                                        |
| 8       | exp Diabetes Mellitus/ or Metabolic Diseases/                                                                                                                                                                                                                                                                                                                                                                                     |
| 9       | (diabet* or t2d or t1d or niddm or iddm or metabolic disease).ti,ab,kw.                                                                                                                                                                                                                                                                                                                                                           |
| 10      | 8 or 9                                                                                                                                                                                                                                                                                                                                                                                                                            |
| 11      | 7 and 10                                                                                                                                                                                                                                                                                                                                                                                                                          |
| 12      | limit 11 to yr="2019 -Current"                                                                                                                                                                                                                                                                                                                                                                                                    |
| 13      | limit 11 to ("systematic review" or "reviews (maximizes specificity)")                                                                                                                                                                                                                                                                                                                                                            |
| 14      | ((systematic or evidence) adj3 review) or rapid review or overview).ti.                                                                                                                                                                                                                                                                                                                                                           |
| 15      | 12 and 14                                                                                                                                                                                                                                                                                                                                                                                                                         |
| 16      | 13 or 15                                                                                                                                                                                                                                                                                                                                                                                                                          |

| EMBASE |                                                                                                                                                                                                                                                                                                                                                                                                                                   |
|--------|-----------------------------------------------------------------------------------------------------------------------------------------------------------------------------------------------------------------------------------------------------------------------------------------------------------------------------------------------------------------------------------------------------------------------------------|
| 1      | exp Coronavirus/                                                                                                                                                                                                                                                                                                                                                                                                                  |
| 2      | exp Coronavirus Infections/                                                                                                                                                                                                                                                                                                                                                                                                       |
| 3      | (coronavirus* or corona virus* or OC43 or NL63 or 229E or HKU1 or HCoV* or ncov* or covid* or sars-cov* or sarscov* or Sars-coronavirus* or Severe Acute Respiratory Syndrome Coronavirus*).mp.                                                                                                                                                                                                                                   |
| 4      | ((pneumonia or covid* or coronavirus* or corona virus* or ncov* or 2019-ncov or sars*).mp. or exp pneumonia/) and Wuhan.mp.                                                                                                                                                                                                                                                                                                       |
| 5      | (2019-ncov or ncov19 or ncov-19 or 2019-novel CoV or sars-cov2 or sars-cov-2 or sarscov2 or sarscov-2 or Sars-coronavirus2 or Sars-coronavirus-2 or SARS-like coronavirus* or coronavirus-19 or covid19 or covid-19 or covid 2019 or ((novel or new or nouveau) adj2 (CoV on nCoV or covid or coronavirus* or corona virus or Pandemi*2)) or ((covid or covid19 or covid-19) and pandemic*2) or (coronavirus* and pneumonia)).mp. |
| 6      | 1 or 2 or 3 or 4 or 5                                                                                                                                                                                                                                                                                                                                                                                                             |
| 7      | exp *Diabetes Mellitus/ or Metabolic Disease/                                                                                                                                                                                                                                                                                                                                                                                     |
| 8      | (diabet* or t2d or t1d or niddm or iddm or metabolic disease*).ti,ab,kw.                                                                                                                                                                                                                                                                                                                                                          |
| 9      | 7 or 8                                                                                                                                                                                                                                                                                                                                                                                                                            |



|    |                                                                                         |
|----|-----------------------------------------------------------------------------------------|
| 10 | 6 and 9                                                                                 |
| 11 | limit 10 to yr="2019 -Current"                                                          |
| 12 | limit 11 to (meta analysis or "systematic review" or "reviews (maximizes specificity)") |

| <b>OTHER DATABASES</b>                                                                                                     |                |
|----------------------------------------------------------------------------------------------------------------------------|----------------|
| Terms                                                                                                                      | Database       |
| Diabetes AND "systematic Review"                                                                                           | LitCOVID       |
| diabetes AND "rapid review"                                                                                                | LitCOVID       |
| diabetes AND "literature review"                                                                                           | LitCOVID       |
| diabetes AND meta-analysis                                                                                                 | LitCOVID       |
| (coronavirus OR COVID-19) AND diabetes - limited to Systematic Reviews and Evidence-based Synopses                         | TRIP           |
| (covid-19 OR coronavirus) AND diabetes AND ("systematic review" OR "rapid review" OR "literature review" OR meta-analysis) | Google Scholar |
| 48 of 1st 100 results included                                                                                             |                |

## References

1. Barron E, Bakhai C, Kar P, Weaver A, Bradley D, Ismail H, et al. Associations of type 1 and type 2 diabetes with COVID-19-related mortality in England: a whole-population study. *Lancet Diabetes Endocrinol*. 2020;8(10):813-22.
2. Hartmann-Boyce J, Morris E, Goyder C, Kinton J, Perring J, Nunan D, et al. Diabetes and COVID-19: Risks, Management, and Learnings From Other National Disasters. *Diabetes Care*. 2020;43(8):1695-703.
3. PROTOCOL Rapid reviews of evidence for WHO scientific briefs on COVID-19 and selected Noncommunicable Diseases (NCDs) 2020 [Available from: <https://www.cebm.net/covid-19/protocol-rapid-reviews-of-evidence-for-who-scientific-briefs-on-covid-19-and-selected-noncommunicable-diseases-ncds/>].
4. J H-B. Rapid reviews relating to COVID-19 and diabetes; Diabetes update 6.10.22. Open Science Framework. 2022;DOI 10.17605/OSF.IO/HEVPJ.
5. Hartmann-Boyce J, Rees K, Perring JC, Kerneis SA, Morris EM, Goyder C, et al. Risks of and From SARS-CoV-2 Infection and COVID-19 in People With Diabetes: A Systematic Review of Reviews. *Diabetes Care*. 2021;44(12):2790-811.
6. Shea BJ, Reeves BC, Wells G, Thuku M, Hamel C, Moran J, et al. AMSTAR 2: a critical appraisal tool for systematic reviews that include randomised or non-randomised studies of healthcare interventions, or both. *BMJ*. 2017;358:j4008.
7. Harrison SL, Buckley BJR, Rivera-Caravaca JM, Zhang J, Lip GYH. Cardiovascular risk factors, cardiovascular disease, and COVID-19: an umbrella review of systematic reviews. *European Heart Journal Quality of Care & Clinical Outcomes*. 2021;7(4):330-9.
8. Kastora S, Patel M, Carter B, Delibegovic M, Myint PK. Impact of diabetes on COVID-19 mortality and hospital outcomes from a global perspective: An umbrella systematic review and meta-analysis. *Endocrinology, and Diabetes & Metabolism*. 2022;5(3):e00338.
9. Mair M, Singhavi H, Pai A, Singhavi J, Gandhi P, Conboy P, et al. A Meta-Analysis of 67 Studies with Presenting Symptoms and Laboratory Tests of COVID-19 Patients. *Laryngoscope*. 2020.
10. Sales-Peres SHC, de Azevedo-Silva LJ, Bonato RCS, Sales-Peres MC, Pinto A, Santiago Junior JF. Coronavirus (SARS-CoV-2) and the risk of obesity for critically illness and ICU admitted: Meta-analysis of the epidemiological evidence. *Obes Res Clin Pract*. 2020;14(5):389-97.
11. Espinosa OA, Zanetti ADS, Antunes EF, Longhi FG, Matos TA, Battaglini PF. Prevalence of comorbidities in patients and mortality cases affected by SARS-CoV2: a systematic review and meta-analysis. *Rev Inst Med Trop Sao Paulo*. 2020;62:e43.
12. Khateri S, Mohammadi H, Khateri R, Moradi Y. The Prevalence of Underlying Diseases and Comorbidities in COVID-19 Patients; an Updated Systematic Review and Meta-analysis. *Arch Acad Emerg Med*. 2020;8(1):e72.
13. Kumar A, Arora A, Sharma P, Anikhindi SA, Bansal N, Singla V, et al. Is diabetes mellitus associated with mortality and severity of COVID-19? A meta-analysis. *Diabetes Metab Syndr*. 2020;14(4):535-45.
14. Meng M, Zhao Q, Kumar R, Bai C, Deng Y, Wan B. Impact of cardiovascular and metabolic diseases on the severity of COVID-19: a systematic review and meta-analysis. *Aging (Albany NY)*. 2020;12(22):23409-21.
15. Pinedo-Torres I, Flores-Fernández M, Yovera-Aldana M, Gutierrez-Ortiz C, Zegarra-Lizana P, Intimayta-Escalante C, et al. Prevalence of Diabetes Mellitus and Its Associated Unfavorable Outcomes in Patients With Acute Respiratory Syndromes Due to Coronaviruses Infection: A Systematic Review and Meta-Analysis. *Clin Med Insights Endocrinol Diabetes*. 2020;13:1179551420962495.
16. Zhou Y, Yang Q, Chi J, Dong B, Lv W, Shen L, et al. Comorbidities and the risk of severe or fatal outcomes associated with coronavirus disease 2019: A systematic review and meta-analysis. *Int J Infect Dis*. 2020;99:47-56.

17. Desai R, Singh S, Parekh T, Sachdeva S, Sachdeva R, Kumar G. COVID-19 and diabetes mellitus: A need for prudence in elderly patients from a pooled analysis. *Diabetes Metab Syndr*. 2020;14(4):683-5.
18. Mantovani A, Byrne CD, Zheng MH, Targher G. Diabetes as a risk factor for greater COVID-19 severity and in-hospital death: A meta-analysis of observational studies. *Nutr Metab Cardiovasc Dis*. 2020;30(8):1236-48.
19. Hussain S, Baxi H, Chand Jamali M, Nisar N, Hussain MS. Burden of diabetes mellitus and its impact on COVID-19 patients: A meta-analysis of real-world evidence. *Diabetes Metab Syndr*. 2020;14(6):1595-602.
20. Barrera FJ, Shekhar S, Wurth R, Moreno-Pena PJ, Ponce OJ, Hajdenberg M, et al. Prevalence of Diabetes and Hypertension and Their Associated Risks for Poor Outcomes in Covid-19 Patients. *J Endocr Soc*. 2020;4(9):bvaa102.
21. Du M, Lin YX, Yan WX, Tao LY, Liu M, Liu J. Prevalence and impact of diabetes in patients with COVID-19 in China. *World J Diabetes*. 2020;11(10):468-80.
22. Wang X, Wang S, Sun L, Qin G. Prevalence of diabetes mellitus in 2019 novel coronavirus: A meta-analysis. *Diabetes Res Clin Pract*. 2020;164:108200.
23. Chen Z, Peng Y, Wu X, Pang B, Yang F, Zheng W, et al. Comorbidities and complications of COVID-19 associated with disease severity, progression, and mortality in China with centralized isolation and hospitalization: A systematic review and meta-analysis. *Frontiers in Public Health*. 2022;10:923485.
24. Chua PEY, Shah SU, Gui H, Koh J, Somani J, Pang J. Epidemiological and clinical characteristics of non-severe and severe pediatric and adult COVID-19 patients across different geographical regions in the early phase of pandemic: a systematic review and meta-analysis of observational studies. *Journal of Investigative Medicine*. 2021;69(7):1287-96.
25. Parveen R, Sehar N, Bajpai R, Agarwal NB. Association of diabetes and hypertension with disease severity in covid-19 patients: A systematic literature review and exploratory meta-analysis. *Diabetes Res Clin Pract*. 2020;166:108295.
26. Fang X, Li S, Yu H, Wang P, Zhang Y, Chen Z, et al. Epidemiological, comorbidity factors with severity and prognosis of COVID-19: a systematic review and meta-analysis. *Aging (Albany NY)*. 2020;12(13):12493-503.
27. Gaba U, Altamish M, Azharuddin M, Adil M, Ghosh P, Gyawali B, et al. Risk factors and outcomes associated with diabetes mellitus in COVID-19 patients: a meta-analytic synthesis of observational studies. *Journal of Diabetes & Metabolic Disorders*. 2022;1-11.
28. Li Y, Ashcroft T, Chung A, Dighero I, Dozier M, Horne M, et al. Risk factors for poor outcomes in hospitalised COVID-19 patients: A systematic review and meta-analysis. *Journal of Global Health*. 2021;11:10001.
29. Izcovich A, Ragusa MA, Tortosa F, Lavena Marzio MA, Agnoletti C, Bengolea A, et al. Prognostic factors for severity and mortality in patients infected with COVID-19: A systematic review. *PLoS One*. 2020;15(11):e0241955.
30. Luo L, Fu M, Li Y, Hu S, Luo J, Chen Z, et al. The potential association between common comorbidities and severity and mortality of coronavirus disease 2019: A pooled analysis. *Clin Cardiol*. 2020;43(12):1478-93.
31. Mesas AE, Caverro-Redondo I, Álvarez-Bueno C, Sarriá Cabrera MA, Maffei de Andrade S, Sequí-Dominguez I, et al. Predictors of in-hospital COVID-19 mortality: A comprehensive systematic review and meta-analysis exploring differences by age, sex and health conditions. *PLoS One*. 2020;15(11):e0241742.
32. Singh AK, Gillies CL, Singh R, Singh A, Chudasama Y, Coles B, et al. Prevalence of co-morbidities and their association with mortality in patients with COVID-19: A systematic review and meta-analysis. *Diabetes Obes Metab*. 2020;22(10):1915-24.

33. Ssentongo P, Ssentongo AE, Heilbrunn ES, Ba DM, Chinchilli VM. Association of cardiovascular disease and 10 other pre-existing comorbidities with COVID-19 mortality: A systematic review and meta-analysis. *PLoS One*. 2020;15(8):e0238215.
34. Varikasuvu SR, Dutt N, Thangappazham B, Varshney S. Diabetes and COVID-19: A pooled analysis related to disease severity and mortality. *Prim Care Diabetes*. 2021;15(1):24-7.
35. Yang J, Zheng Y, Gou X, Pu K, Chen Z, Guo Q, et al. Prevalence of comorbidities and its effects in patients infected with SARS-CoV-2: a systematic review and meta-analysis. *Int J Infect Dis*. 2020;94:91-5.
36. Figliozzi S, Masci PG, Ahmadi N, Tondi L, Koutli E, Aimo A, et al. Predictors of adverse prognosis in COVID-19: A systematic review and meta-analysis. *Eur J Clin Invest*. 2020;50(10):e13362.
37. Mudatsir M, Fajar JK, Wulandari L, Soegiarto G, Ilmawan M, Purnamasari Y, et al. Predictors of COVID-19 severity: a systematic review and meta-analysis. *F1000Res*. 2020;9:1107.
38. Plasencia-Urizarri TM, Aguilera-Rodríguez R, Almaguer-Mederos LE. Comorbidities and clinical severity of COVID-19: systematic review and meta-analysis. *Rev habanera cienc méd*. 2020:e3389-e.
39. Wang B, Li R, Lu Z, Huang Y. Does comorbidity increase the risk of patients with COVID-19: evidence from meta-analysis. *Aging (Albany NY)*. 2020;12(7):6049-57.
40. Boddu SK, Aurangabadkar G, Kuchay MS. New onset diabetes, type 1 diabetes and COVID-19. *Diabetes & Metabolic Syndrome: Clinical Research & Reviews*. 2020.
41. Shafiee A, Teymouri Athar MM, Nassar M, Seighali N, Aminzade D, Fattahi P, et al. Comparison of COVID-19 outcomes in patients with Type 1 and Type 2 diabetes: A systematic review and meta-analysis. *Diabetes & Metabolic Syndrome*. 2022;16(6):102512.
42. Alhumaid S, Al Mutair A, Al Alawi Z, Rabaan AA, Alomari MA, Al Salman SA, et al. Diabetic ketoacidosis in patients with SARS-CoV-2: a systematic review and meta-analysis. *Diabetology & metabolic syndrome*. 2021;13(1):120.
43. Schlesinger S, Neuenschwander M, Lang A, Pafili K, Kuss O, Herder C, et al. Risk phenotypes of diabetes and association with COVID-19 severity and death: a living systematic review and meta-analysis. *Diabetologia*. 2021;64(7):1480-91.
44. Apicella M, Campopiano MC, Mantuano M, Mazoni L, Coppelli A, Del Prato S. COVID-19 in people with diabetes: understanding the reasons for worse outcomes. *Lancet Diabetes Endocrinol*. 2020;8(9):782-92.
45. Holman N, Knighton P, Kar P, O'Keefe J, Curley M, Weaver A, et al. Risk factors for COVID-19-related mortality in people with type 1 and type 2 diabetes in England: a population-based cohort study. *Lancet Diabetes Endocrinol*. 2020;8(10):823-33.
46. Sathish T, Kapoor N, Cao Y, Tapp RJ, Zimmet P. Proportion of newly diagnosed diabetes in COVID-19 patients: A systematic review and meta-analysis. *Diabetes Obes Metab*. 2020.
47. Chen J, Wu C, Wang X, Yu J, Sun Z. The Impact of COVID-19 on Blood Glucose: A Systematic Review and Meta-Analysis. *Front Endocrinol (Lausanne)*. 2020;11:574541.
48. Chowdhury S, Goswami S. COVID-19 and type 1 diabetes: dealing with the difficult duo. *Int J Diabetes Dev Ctries*. 2020:1-6.
49. Lee MH, Wong C, Ng CH, Yuen DCW, Lim AYL, Khoo CM. Effects of hyperglycaemia on complications of COVID-19: A meta-analysis of observational studies. *Diabetes Obes Metab*. 2021;23(1):287-9.
50. Sacks LJ, Pham CT, Fleming N, Neoh SL, Ekinci EI. Considerations for people with diabetes during the Coronavirus Disease (COVID-19) pandemic. *Diabetes Res Clin Pract*. 2020;166:108296.
51. Yanai H. Metabolic Syndrome and COVID-19. *Cardiol Res*. 2020;11(6):360-5.
52. Zhu Z, Mao Y, Chen G. Predictive value of HbA1c for in-hospital adverse prognosis in COVID-19: A systematic review and meta-analysis. *Primary care diabetes*. 2021;15(6):910-7.

53. Prattichizzo F, de Candia P, Nicolucci A, Ceriello A. Elevated HbA1c levels in pre-Covid-19 infection increases the risk of mortality: A systematic review and meta-analysis. *Diabetes/Metabolism Research Reviews*. 2022;38(1):e3476.
54. Kan C, Zhang Y, Han F, Xu Q, Ye T, Hou N, et al. Mortality Risk of Antidiabetic Agents for Type 2 Diabetes With COVID-19: A Systematic Review and Meta-Analysis. *Frontiers in Endocrinology*. 2021;12:708494.
55. Nguyen NN, Ho DS, Nguyen HS, Ho DKN, Li HY, Lin CY, et al. Preadmission use of antidiabetic medications and mortality among patients with COVID-19 having type 2 diabetes: A meta-analysis. *Metabolism: Clinical & Experimental*. 2022;131:155196.
56. Chen Y, Lv X, Lin S, Arshad M, Dai M. The Association Between Antidiabetic Agents and Clinical Outcomes of COVID-19 Patients With Diabetes: A Bayesian Network Meta-Analysis. *Frontiers in Endocrinology*. 2022;13:895458.
57. Wang W, Sun Y, Wang S, Sun Y. The Relationship Between Insulin Use And Increased Mortality In Patients With COVID-19 And Diabetes: A Meta-Analysis. *Endocrine Research*. 2022;47(1):32-8.
58. Yang Y, Cai Z, Zhang J. Insulin Treatment May Increase Adverse Outcomes in Patients With COVID-19 and Diabetes: A Systematic Review and Meta-Analysis. *Frontiers in Endocrinology*. 2021;12:696087.
59. Han T, Ma S, Sun C, Zhang H, Qu G, Chen Y, et al. Association Between Anti-diabetic Agents and Clinical Outcomes of COVID-19 in Patients with Diabetes: A Systematic Review and Meta-Analysis. *Archives of Medical Research*. 2022;53(2):186-95.
60. Hariyanto TI, Kurniawan A. Dipeptidyl peptidase 4 (DPP4) inhibitor and outcome from coronavirus disease 2019 (COVID-19) in diabetic patients: a systematic review, meta-analysis, and meta-regression. *Journal of Diabetes & Metabolic Disorders*. 2021;20(1):543-50.
61. Patoulis D, Doumas M. Dipeptidyl Peptidase-4 Inhibitors and COVID-19-Related Deaths among Patients with Type 2 Diabetes Mellitus: A Meta-Analysis of Observational Studies. *Endocrinology and Metabolism*. 2021;36(4):904-8.
62. Bonora BM, Avogaro A, Fadini GP. Disentangling conflicting evidence on DPP-4 inhibitors and outcomes of COVID-19: narrative review and meta-analysis. *Journal of Endocrinological Investigation*. 2021;44(7):1379-86.
63. Pal R, Banerjee M, Mukherjee S, Bhogal RS, Kaur A, Bhadada SK. Dipeptidyl peptidase-4 inhibitor use and mortality in COVID-19 patients with diabetes mellitus: an updated systematic review and meta-analysis. *Therapeutic Advances in Endocrinology & Metabolism*. 2021;12:2042018821996482.
64. Rakhmat, II, Kusmala YY, Handayani DR, Juliastuti H, Nawangsih EN, Wibowo A, et al. Dipeptidyl peptidase-4 (DPP-4) inhibitor and mortality in coronavirus disease 2019 (COVID-19) - A systematic review, meta-analysis, and meta-regression. *Diabetes & Metabolic Syndrome*. 2021;15(3):777-82.
65. Zein A, Raffaello WM. Dipeptidyl peptidase-4 (DPP-IV) inhibitor was associated with mortality reduction in COVID-19 - A systematic review and meta-analysis. *Primary care diabetes*. 2022;16(1):162-7.
66. Yang Y, Cai Z, Zhang J. DPP-4 inhibitors may improve the mortality of coronavirus disease 2019: A meta-analysis. *PLoS ONE [Electronic Resource]*. 2021;16(5):e0251916.
67. Flaherty GT, Hession P, Liew CH, Lim BCW, Leong TK, Lim V, et al. COVID-19 in adult patients with pre-existing chronic cardiac, respiratory and metabolic disease: a critical literature review with clinical recommendations. *Trop Dis Travel Med Vaccines*. 2020;6:16.
68. Carrasco-Sanchez FJ, Carretero-Anibarro E, Gargallo MA, Gomez-Huelgas R, Merino-Torres JF, Orozco-Beltran D, et al. [Executive Summary from Expert consensus on effectiveness and safety of iDPP-4 in the treatment of patients with diabetes and COVID-19]. *Endocrinologia Diabetes y Nutricion*. 2022;69(3):209-18.

69. Li Y, Yang X, Yan P, Sun T, Zeng Z, Li S. Metformin in Patients With COVID-19: A Systematic Review and Meta-Analysis. *Frontiers in Medicine*. 2021;8:704666.
70. Ganesh A, Randall MD. Does metformin affect outcomes in COVID-19 patients with new or pre-existing diabetes mellitus? A systematic review and meta-analysis. *British Journal of Clinical Pharmacology*. 2022;88(6):2642-56.
71. Hariyanto TI, Kurniawan A. Metformin use is associated with reduced mortality rate from coronavirus disease 2019 (COVID-19) infection. *Obes Med*. 2020;19:100290.
72. Kow CS, Hasan SS. Mortality risk with preadmission metformin use in patients with COVID-19 and diabetes: A meta-analysis. *J Med Virol*. 2021;93(2):695-7.
73. Lukito AA, Pranata R, Henrina J, Lim MA, Lawrensia S, Suastika K. The Effect of Metformin Consumption on Mortality in Hospitalized COVID-19 patients: a systematic review and meta-analysis. *Diabetes Metab Syndr*. 2020;14(6):2177-83.
74. Poly TN, Islam MM, Li YJ, Lin MC, Hsu MH, Wang YC. Metformin Use Is Associated with Decreased Mortality in COVID-19 Patients with Diabetes: Evidence from Retrospective Studies and Biological Mechanism. *Journal of Clinical Medicine*. 2021;10(16):09.
75. Yang W, Sun X, Zhang J, Zhang K. The effect of metformin on mortality and severity in COVID-19 patients with diabetes mellitus. *Diabetes Research & Clinical Practice*. 2021;178:108977.
76. Lee KN, Torres MA, Troeschel AN, He J, Gogineni K, McCullough LE. Type 2 diabetes, breast cancer specific and overall mortality: Associations by metformin use and modification by race, body mass, and estrogen receptor status. *PLoS One*. 2020;15(5):e0232581.
77. Zangiabadian M, Nejadghaderi SA, Zahmatkesh MM, Hajikhani B, Mirsaeidi M, Nasiri MJ. The Efficacy and Potential Mechanisms of Metformin in the Treatment of COVID-19 in the Diabetics: A Systematic Review. *Frontiers in Endocrinology*. 2021;12:645194.
78. Corona G, Pizzocaro A, Vena W, Rastrelli G, Semeraro F, Isidori AM, et al. Diabetes is most important cause for mortality in COVID-19 hospitalized patients: Systematic review and meta-analysis. *Reviews in Endocrine & Metabolic Disorders*. 2021;22(2):275-96.
79. Maddaloni E, D'Onofrio L, Siena A, Luordi C, Mignogna C, Amendolara R, et al. Impact of cardiovascular disease on clinical outcomes in hospitalized patients with Covid-19: a systematic review and meta-analysis. *Internal & Emergency Medicine*. 2021;16(7):1975-85.
80. Huang I, Lim MA, Pranata R. Diabetes mellitus is associated with increased mortality and severity of disease in COVID-19 pneumonia - A systematic review, meta-analysis, and meta-regression. *Diabetes Metab Syndr*. 2020;14(4):395-403.
81. Choi JH, Choi SH, Yun KW. Risk Factors for Severe COVID-19 in Children: A Systematic Review and Meta-Analysis. *Journal of Korean Medical Science*. 2022;37(5):e35.
82. Kompaniyets L, Agathis NT, Nelson JM, Preston LE, Ko JY, Belay B, et al. Underlying Medical Conditions Associated With Severe COVID-19 Illness Among Children. *JAMA Netw Open*. 2021;4(6):e2111182.
